# Supplementary material for: Comparative Genomics of a Plant-Pathogenic Fungus,Pyrenophora tritici-repentis, Reveals Transduplication and the Impact of Repeat Elements on Pathogenicity and Population Divergence
Source: Oxford University Press journal article supplement (doi:10.1534/g3.112.004044), 2013-01-01
Supplement: 41_004044si.pdf [file 41_004044si.pdf]

A

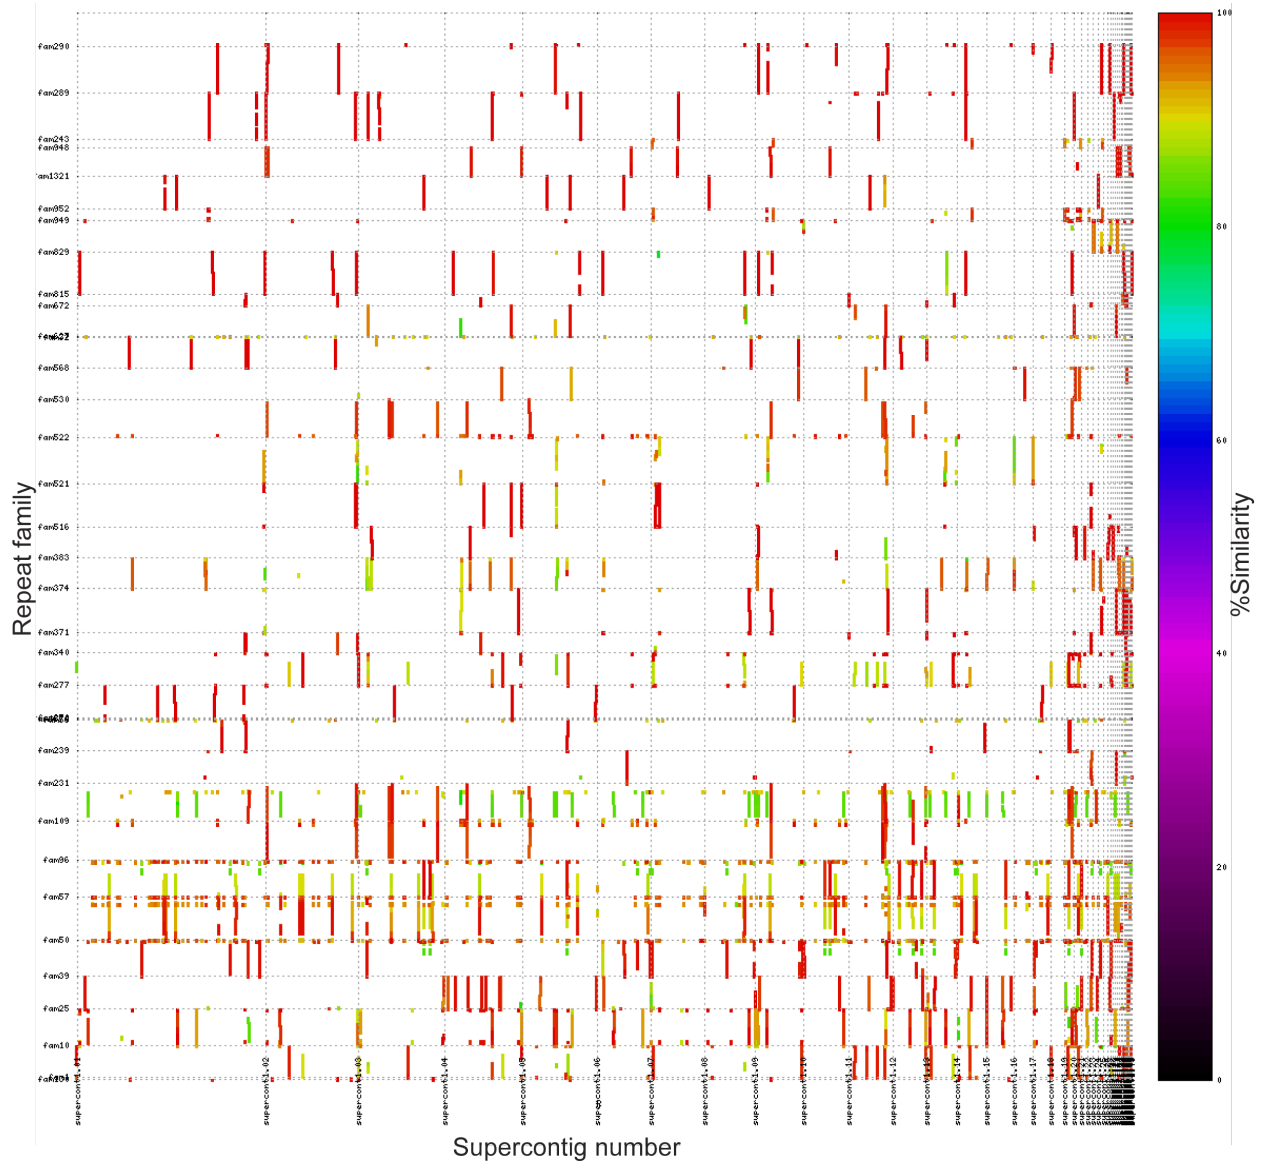

B

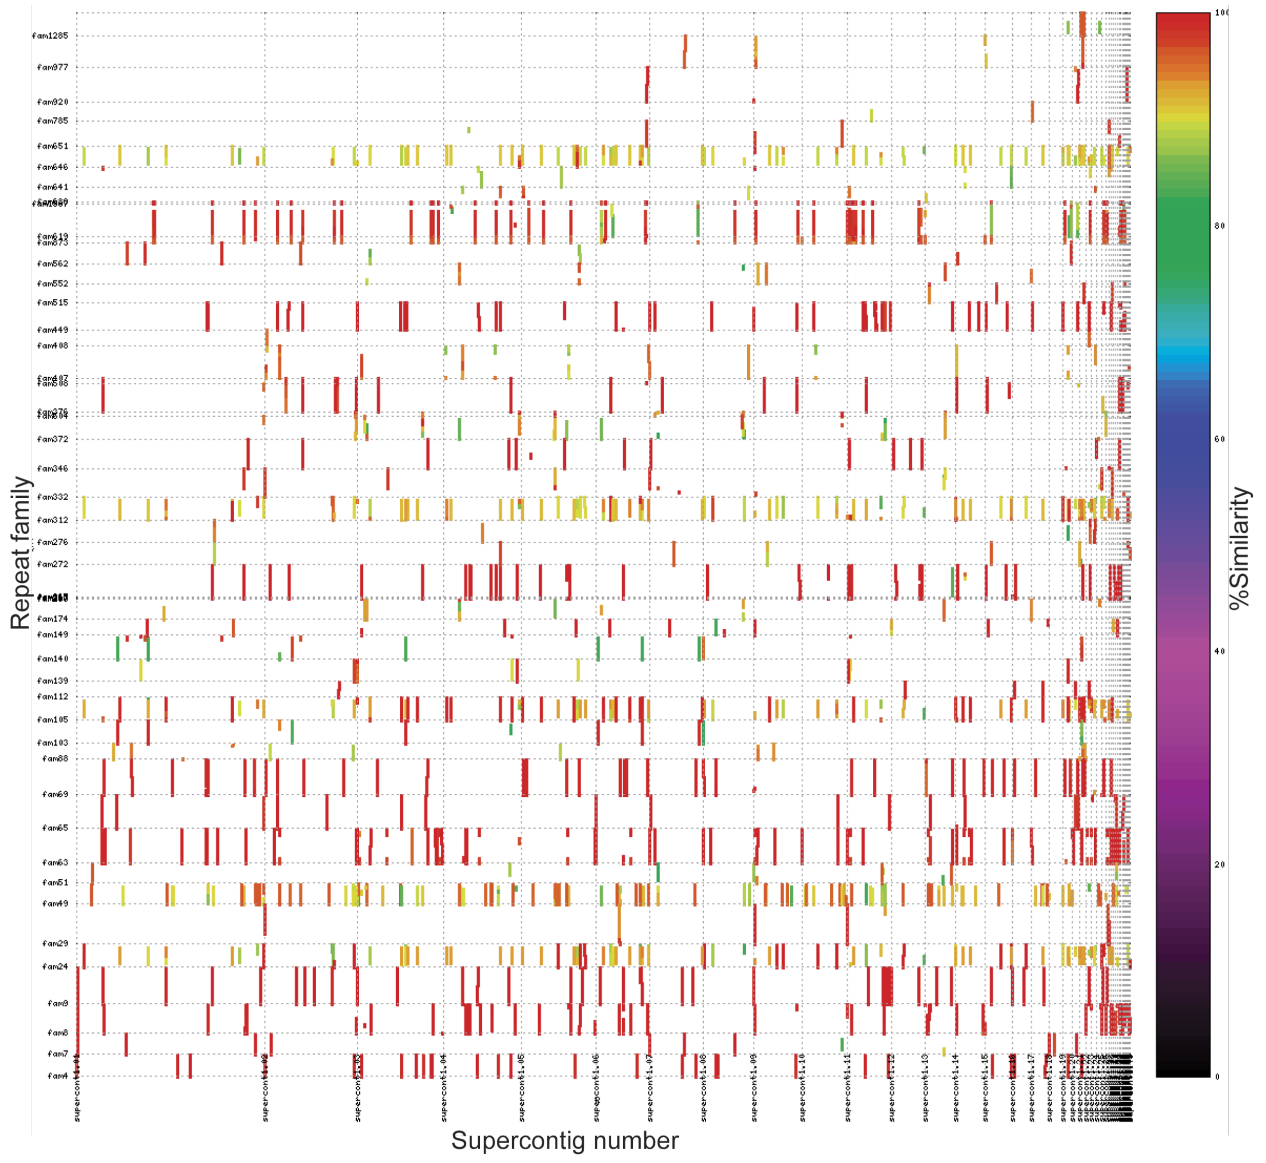

C

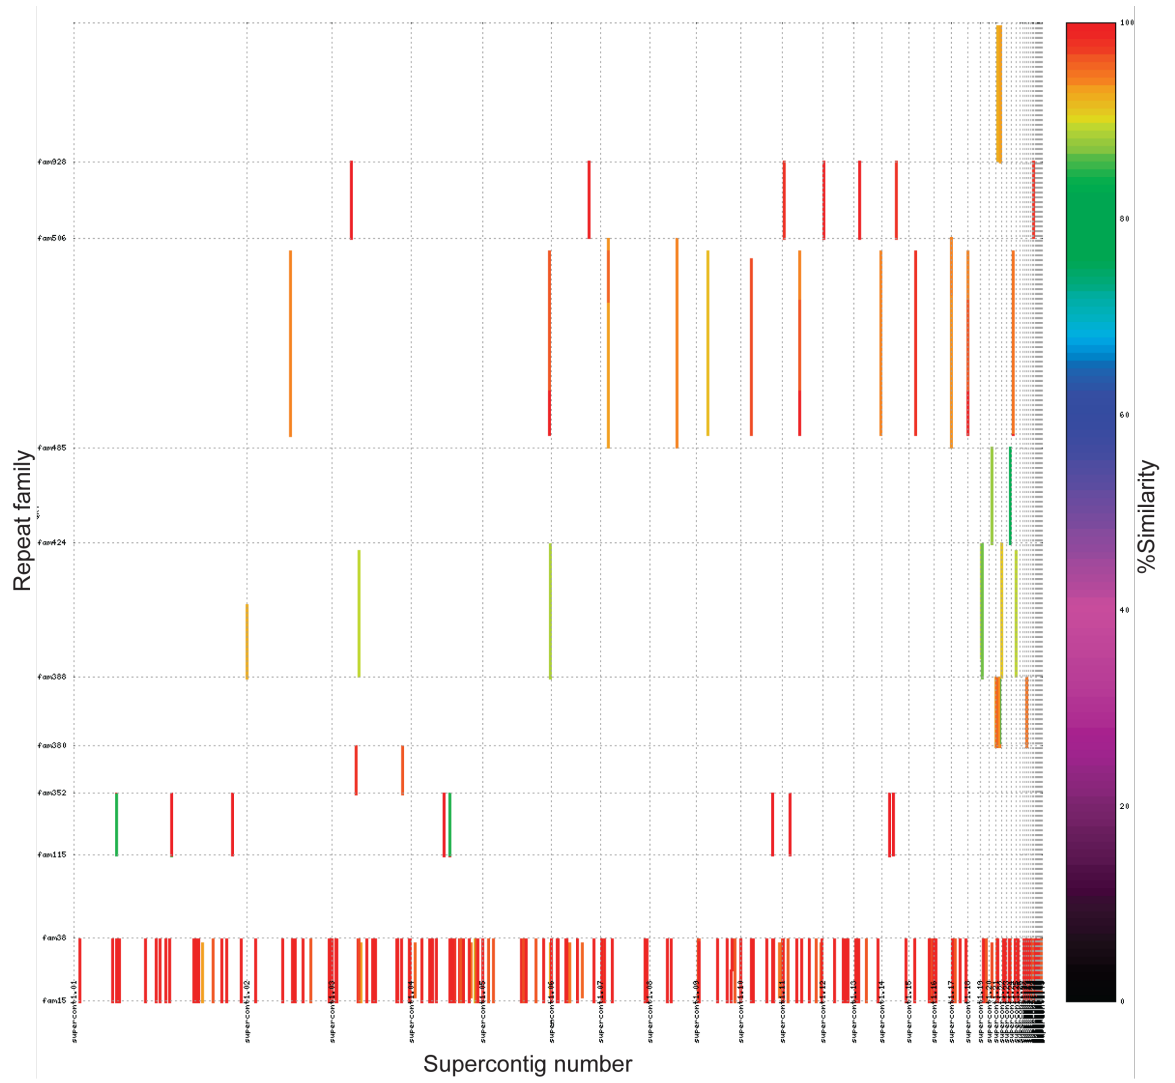

**Figure S1** Similarity and distribution of (A) LTR retrotransposons, (B) DNA transposons and (C) MITEs across the Supercontig assemblies of BFP-ToxAC. The repeat family name is indicated on the left. The color scale on the right indicates % similarity from 0 (black) to 100 (red).

A Glycosyl\_hydrolase-associated Pfam

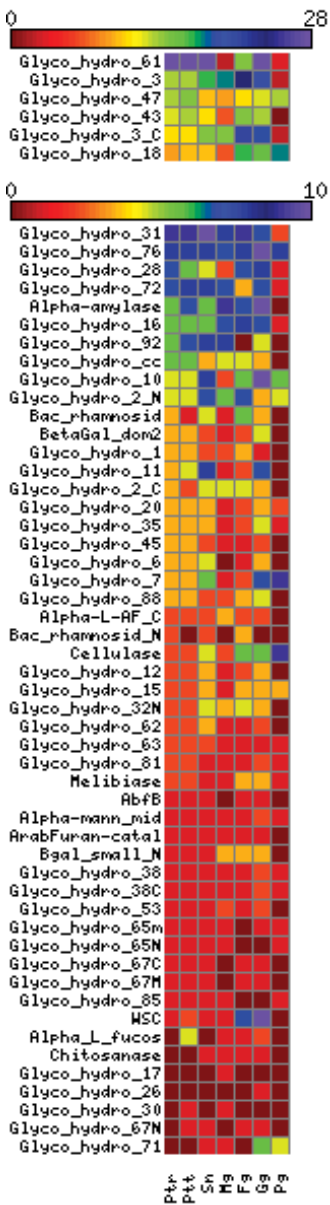

Other Cazy-associated Pfam

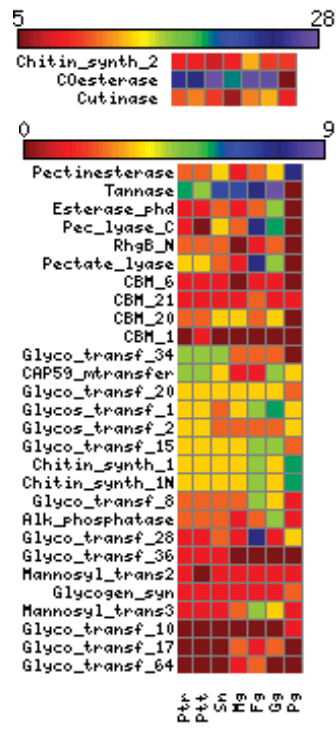

Ptt – *Pyrenophora teres f. teres*  
Sn – *Stagonospora nodorum*  
Mg – *Mycosphaerella graminicola*  
Fg – *Fusarium graminearum*  
Gg – *Glomerella graminicola*  
Pg – *Puccinia graminis*

Other Cell Wall enzyme-associated Pfam

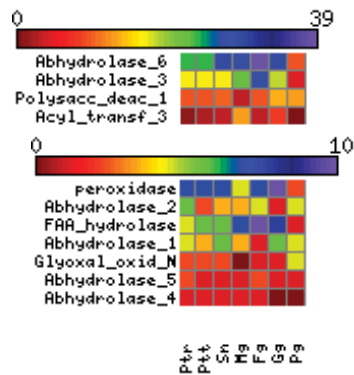

B

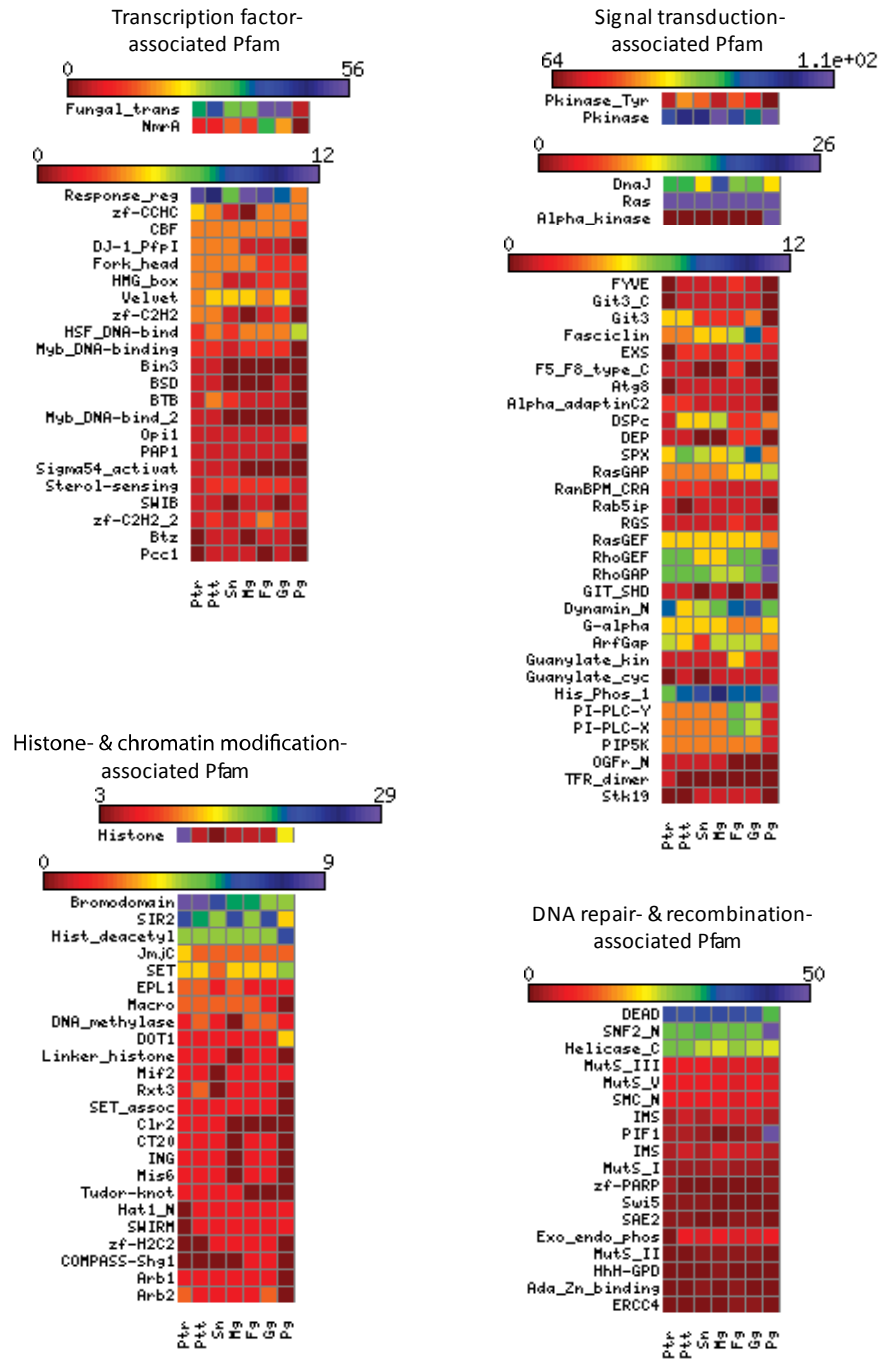

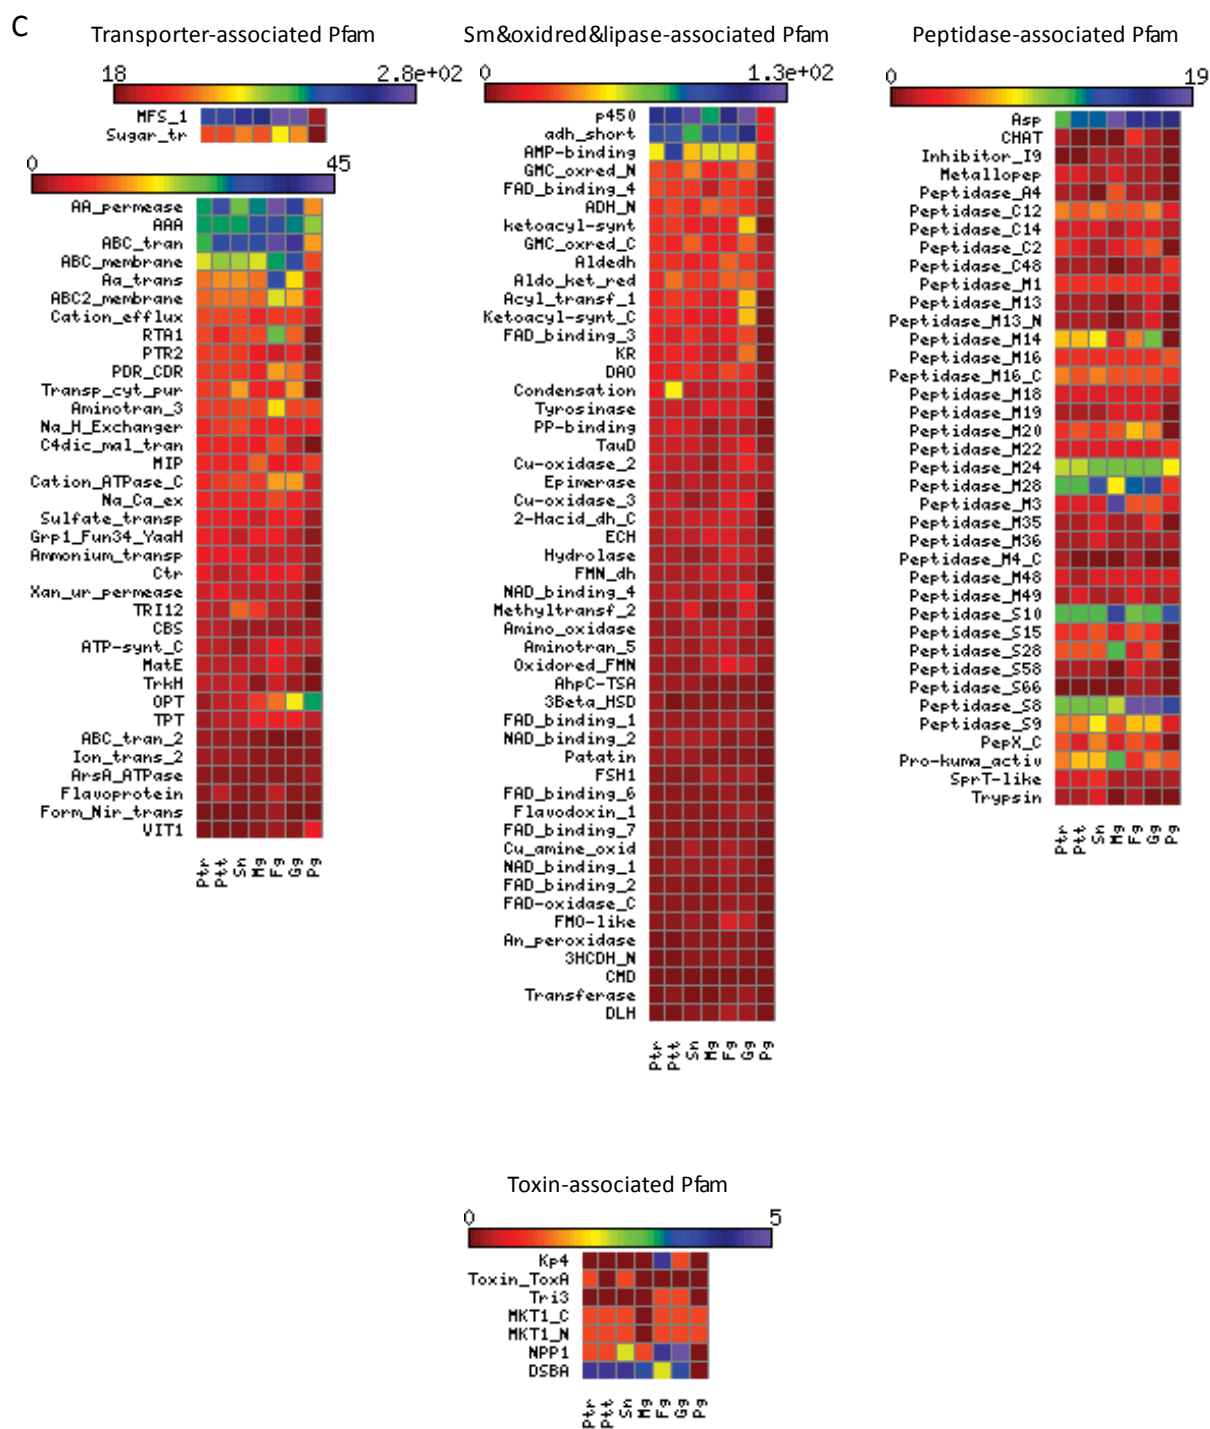

**Figure S2** Heat map of Pfam domains for (A) carbohydrate active enzymes and other cell wall enzymes, (B) proteins involved in sensing and response (C) proteins associated with transport, oxidative stress and toxin activity present in *Ptr* and other cereal pathogens.

PTRG\_03457 CGTCATGCAGTCCGTGCGCTGCTGCCTTTACTAGTGCAGAAATCGGGAAATGCCGTGCGCCAAACTTTCCAGCTACCTAACTCTTTCAGCCTACTACTT  
 DW7\_94 CGTCATGCAGTCCGTGCGCTGCTGCCTTTACTAGTGCAGAAATCGGGAAATGCCGTGCGCCAAACTTTCCAGCTACCTAACTCTTTCAGCCTACTACTT  
 DW7\_14025 CGTTATGCAGTCCGTGCGCTGCTGCCTTTACTAGTGCAGAAATCGGGAAATGCCGTGCGCCAAACTTTCCAGCTACCTAACTCTTTCAGCCTACTACTT  
 PTRG\_00559 AGCTACCTAACTCTTTCAGCCTACTACTT  
 SD20\_20175 CTTTCAGCCTACTACTT

DW7\_94 TCTTAATTGTCGACCACATTTATCACAGTAATTAATCACATACGTGCGCTACGTTCAATCATCTACTCTACTACGCAATGGCAAGGACAAAACACGGCCT  
 DW7\_14025 TCTTAATTGTCGACCACATTTATCACAGTAATTAATCACATACGTGCGCTACGTTCAATCATCTACTCTACTACGCAATGGCAAGGACAAAACACGGCCT  
 PTRG\_00559 TCTTAATTGTCGACCACATTTATCACAGTAATTAATCACATACGTGCGCTACGTTCAATCATCTACTCTACTACGCAATGGCAAGGACAAAACACGGCCT  
 SD20\_20175 TCTTAATTGTCGACCACATTTATCACAGTAATTAATCACATACGTGCGCTACATTTATCATCTACTCTACTACGCAATGGCAAGGACAAAACACGGCCT  
 PTRG\_03457 TCTTAATTGTCGACCACATTTATCACAGTAATTAATCACATACGTGCGCTACGTTCAATCATCTACTCTACTACGCAATGGCAAGGACAAAACACGGCCT

DW\_94 AAGGTCACCGGTAAGCCG  
 DW\_14025 AAGGTCACCGGTAAGCCG  
 PTRG\_00559 AAGGTCACCGGTAAGCCGCGGGTGGTCTGATGGCAAGACAGTTACTGGCGGCAAGCCGGCTCAGAAGGCCCTTGTAGTAAGGCTAGACGTCGAAG  
 SD20\_20175 AAGGTCACCGGTAAGCCGCGGGTGGTCTGATGGCAAGACAGTTACTGGCGGCAAGCCGGCTCAGAAGGCCCTTGTAGTAAGGCTAGACGTCGAAG  
 PTRG\_03457 AAGGTCACCGGTAAGCCGCGGGTGGTCTGATGGCAAGACAGTTACTGGCGGCAAGCCGGCTCAGAAGGCCCTTGTAGTAAGGCTAGACGTCGAAG

PTRG\_00559 TAGCAGGAAAGTCTACGCGAAAGGCACCTGTAGCTGTTAAGAAGAAGCGCAAGTTAAGGCCGGCAgtaggttatacacagt~~g~~tttatacacagctat~~ttt~~  
 SD20\_20175 TAGCAGGAAAGTCTACGCGAAAGGCACCTGTAGCTGTTAAGAAGAAGCGCAAGTTAAGGCCGGCAgtaggttatacacagt~~g~~tttatacacagctat~~ttt~~  
 DW7\_11351 AAGAAGCGCAAGTTAAGGCCGGCAgtaggttatacacagt~~g~~tttatacacagctat~~ttt~~  
 PTRG\_03457 TAGCAGGAAAGTCTACGCGAAAGGCACCTGTAGCTGTTAAGAAGAAGCGCAAGTTAAGGCCGGCAgtaggttatacacagt~~g~~tttatacacagctat~~ttt~~

PTRG\_00559 ctaatttagcttagCTGTGCGATTACGGGAAATCAAGAGATACCAGAGAGGTTTTGAACACTCTTGCAGAAACTCCCCCTTTCCCGGTAGTGCAGGAA  
 SD20\_20175 ctaagataagcttagCTGTGCGATTACGGGAAATCAAGAGATACCAGAGAGGTTTTAAACTACTCTTGCAGAAACTCCCCCTTTCCCGGTAGTGCAGGAA  
 DW7\_11351 ctaatcaagcttagCTGTGCGATTACTCAAAATTAAGAGATACCAGAGAGGTTTTAAACTACTCTTGCAGAAACTCCCCCTTTCCCGGTAGTGCAGGAA  
 PTRG\_03457 ctaatttagcttagCTGTGCGATTACGGGAAATCAAGAGATACCAGAGAGGTTTTGAACACTCTTGCAGAAACTCCCCCTTTCCCGGTAGTGCAGGAA

PTRG\_00559 TTTGCACAGGTGCACAAGGCCGATATCCCGCTTCAACGATCTGCAATCGAAGCTCTTCAGGAAGCTACAGAAGCTTTCTTAGTTGGTTATTTTgagggta  
 SD20\_20175 TTTGCACAGGTGCACAAGGCCGATATCCCGCTTCAACGATCTGCAATCGAAGCTCTTCAGGAAGCTACAGAAGCTTTCTTAGTTACTTATTTTgagggta  
 DW7\_11351 TTTGCACAGGTGCACAAGGCCGATATCCCGCTTCAACGATCTGCAATCGAAGCTCTTCAGGAAGCTACAGAAGCTTTCTTAGTTACTTATTTTgagggta  
 PTRG\_03457 TT-GCACAGGTGCACAAGGCCGATATCCCGCTTCAACGATCTGCAATCGAAGCTCTTCAGGAAGCTACAGAAGCTTTCTTAGTTGGTTATTTTgagggta

PTRG\_00559 tagtctatctaccctatactat~~ttt~~ttcatttaataaacttttatagACTGCAACATCAATGCTATTTCAGCAGAAAGGGTTACTATTCAAGAGAAGGATTC  
 SD20\_20175 taatctatctaccctatactat~~ttt~~ttcatttaataaacttttatagACTGCAACATCAATGCTATTTCAGCAGAAAGGGTTACTATTCAAGAGAAGGATTC  
 DW7\_11351 tgaatctatctaccctatactat~~ttt~~ttcatttaataaacttttatagACTGCAACATCAATGCTATTTCAGCAGAAAGGGTTACTATTCAAGAGAAGGATTC  
 PTRG\_03457 tagtctatctaccctatactat~~ttt~~ttcatttaataaacttttatagACTGCAACATCAATGCTATTTCAGCAGAAAGGGTTACTATTCAAGAGAAGGATTC

PTRG\_00559 TCAATTGGCTAGGCGCTACTTTGGCGCGGAGTTACTAGCTTTTCTCTAGATTATAAGATATATCTAGATACACGTGCTTAAATGCTAGCTGGCGAAGCCT  
 SD20\_20175 TCAATTGGCTAGGCGCTACTTTGGCGCGGAGTTACTAGCTTTTCTCTAGATTATAAGATATATCTAGATACACGTGCTTAAATGCTAGCTGGCGAAGCCT  
 DW7\_11351 TCAATTAGCTAGGCGCTACTTTGGCGCGGAGTTACTAGCTTTTCTCTAGATTATAAGATATATCTAGATACACGTGCTTAAATGCTAGCTGGCGAAGCCT  
 PTRG\_03457 TCAATTGGCTAGGCGCTACTTTGGCGCGGAGTTACTAGCTTTTCTCTAGATTATAAGATATATCTAGATACACGTGCTTAAATGCTAGCTGGCGAAGCCT

PTRG\_00559 CTGTATATTATAAATGAAACTAGTTAATGCTACACTG  
 SD20\_20175 CTGTATATTATAAATGAAACTAGTTAATGCTACACTGTTAATGCTACTG  
 DW7\_11351 CTGTATAGTATAAATGAAACTAGTTAATGCTACACTGTAATAATCTACTGTGATACTATATAAACTTTTCTTTTATTGAAATCTATATTATATCTTGC  
 PTRG\_03457 CTGTATATTATAAATGAAACTAGTTAATGCTACACTG

**Figure S3** Alignment of novel H3-like (H3L) genes identified in three different *Ptr* isolates (PTRG numbers refer to genes identified in the reference genome of BFP-ToxAC, while DW7 and SD20 refer to the pathogenic DW7-ToxB and non-pathogenic SD20-NP strains, respectively). In all cases, contigs assembled *de novo* from Illumina reads suggest that copies of H3L genes in both DW7-ToxB and SD20-NP are inactive (note the many point mutations when compared to the PTRG sequences). DW7\_14025 and SD20\_20175 in particular lack a proper start codon (ATG to ATA change, underlined), while DW7\_11351 contains several in-frame nonsense codons in addition to the conserved stop codon (underlined).

## A

```

Ptr H3      1 MARTKQTARKSTGGKAPRKQLASKAARKSAPSTGGVKKPHRYKPGTVALREIRRYQKSTE
Sn H3      1 MARTKQTARKSTGGKAPRKQLASKAARKSAPSTGGVKKPHRYKPGTVALREIRRYQKSTE
NcH3      1 MARTKQTARKSTGGKAPRKQLASKAARKSAPSTGGVKKPHRYKPGTVALREIRRYQKSTE
ScH3      1 MARTKQTARKSTGGKAPRKQLASKAARKSAPSTGGVKKPHRYKPGTVALREIRRYQKSTE
SpH3      1 MARTKQTARKSTGGKAPRKQLASKAARKAAPATGGVKKPHRYRPGTVALREIRRYQKSTE
HsH3.1    1 MARTKQTARKSTGGKAPRKQLATKAARKSAPATGGVKKPHRYRPGTVALREIRRYQKSTE
HsH3.3    1 MARTKQTARKSTGGKAPRKQLATKAARKSAPSTGGVKKPHRYRPGTVALREIRRYQKSTE

SNOG_03319 61 LLIRKLPFQRLVREIAQDFKSDLRFQSSAIGALQESVEAYLVSLFEDTNLCAIHAKRVTI
PTRG_11558.1 61 LLIRKLPFQRLVREIAQDFKSDLRFQSSAIGALQESVEAYLVSLFEDTNLCAIHAKRVTI
NcH3      61 LLIRKLPFQRLVREIAQDFKSDLRFQSSAIGLLQESVESYLVSLFEDTNLCAIHAKRVTI
ScH3      61 LLIRKLPFQRLVREIAQDFKSDLRFQSSAIGALQESVEAYLVSLFEDTNLAAIHAKRVTI
SpH3      61 LLIRKLPFQRLVREIAQDFKSDLRFQSSAIGALQEAVEAYLVSLFEDTNLCAIHAKRVTI
HsH3.1    61 LLIRKLPFQRLVREIAQDFKSDLRFQSSAVMALQEAACEAYLVGLFEDTNLCAIHAKRVTI
HsH3.3    61 LLIRKLPFQRLVREIAQDFKSDLRFQSSAAIGALQEAASEAYLVGLFEDTNLCAIHAKRVTI

SNOG_03319 121 QSKDIQLARRLRGERG
PTRG_11558.1 121 QSKDIQLARRLRGERG
NcH3      121 QSKDIQLARRLRGERN
ScH3      121 QKKDIKLARRLRGERS
SpH3      121 QPKDMQLARRLRGERS
HsH3.1    121 MPKDIQLARRIRGERA
HsH3.3    121 MPKDIQLARRIRGERA

```

## B

```

SNOG_15370 1 MAPKTPDRRNKARPSRGGRAS-----TGSRRRESGKRVGQAGFAPDRAKKRYKPGTVAL
PtrCenH3   1 MAPKSPARRNKARPSRGGRVS-----VGSRKESGKRLGQPGFAPDRAKKRYKPGTVAL
Sc_Cse4   1 METEVPA-----PVRTHSYA-----LDRYVRQKRREKQRKQSLKRVEKKYTPSELAL
Nc_CenH3  1 MPPKGGVTKSAVSKKAAAVPTPKATPPGRRKSRASSVQGDVFPQGGKRRYRPGTLAL
Sp_Cnp1   1 -----MAKKSLMA-----EPGDFIPRPRKKRYRPGTTAL
MmCENpA   1 MGP RR---KPQTPRRR-PS-S-----PAPGPSRQSSSVGSQTLRR-RQKFMWL
HsCENpA   1 MGPRRRSRKPEAPRRRSPSP-----PTPGPSRRRGPVSLGASSHQHSRRRQGWL

SNOG_15370 54 REIRRYQKSTDLLLRLTPFQRLVREIAQTVTT---ETGPTRWQSQAIQALQEA TEAFLVN
PtrCenH3   54 REIKRYQKTTDLLLKLFPFQRLVREIAQSVTT---EDGPNRWQSQAIMALQEA TEAFLVN
Sc_Cse4   48 YEIRKYQRSTDLLISKIPFARLVREIKVTFEFT---KDQDLRWQSMAIMALQEA SEAYLVG
Nc_CenH3  61 KEIRNYQRTDLLVAKLPPFARLVREIAMQFRP---MDEEMRWQSQAILALQEA EAFLVH
Sp_Cnp1   30 REIRKYQRSTDLLIQRLPFSRIVREISSEFVANFSTDVGLRWQSTALQCLQEA EAFLVH
MmCENpA   43 KEIKTLQKSTDLLFRKKPFSMVVREICEKFSR---GVDFNWQAQALLALQEA EAFLIH
HsCENpA   49 KEIRKLQKSTHLLIRKLPFSRLAREICVKFTR---GVDFNWQAQALLALQEA EAFLVH

SNOG_15370 111 LFHDANLCAIHAKRVTIQKDIQLARRLRAANGAPV--
PtrCenH3   111 LFHDANLCAIHAKRVTIQKDIQLARRLRAANGAPV--
Sc_Cse4   105 LEHTNLLALHAKRITIMKKDMLARRIRGQFI----
Nc_CenH3  118 LFEDTNLCAIHAKRVTIMQKDIQLARRIRGVWGAGWV
Sp_Cnp1   90 LFEDTNLCAIHAKRVTIMQDMQLARRIRGA-----
MmCENpA   99 LFDAYLLSLHAGRVTLFPPKDIQLTRRIRGFEGGLP--
HsCENpA   105 LFDAYLLTLHAGRVTLFPPKDVQLARRIRGLEEGLG--

```

**Figure S4** Alignment of *bona fide* histone H3 proteins from *Ptr* with those of other fungi reveal the expected level of conservation. (A) Histone H3 is extremely well conserved among *Ptr*, *S. nodorum* (Sn), *N. crassa* (Nc), *Schizosaccharomyces pombe* (Sp), *Saccharomyces cerevisiae* (Sc) and strongly resembles the replication-dependent H3.1 or replication-independent H3.3 from human (Hs). This is in stark contrast to alignments with the novel family of H3L proteins identified in *Ptr* (see Figure 3B). (B) Centromere-specific variants of H3, called CenH3 or CenpA, have variable N-terminal regions and more conserved histone-fold and C-terminal domains. While this variability suggested that H3Ls may be similar to CenH3 proteins, alignments of the histone-fold domain suggest that H3Ls are derived from canonical H3s (see Figure 3B). In both figures, completely conserved residues are shown in black, similar residues are in green and variable residues are in red.



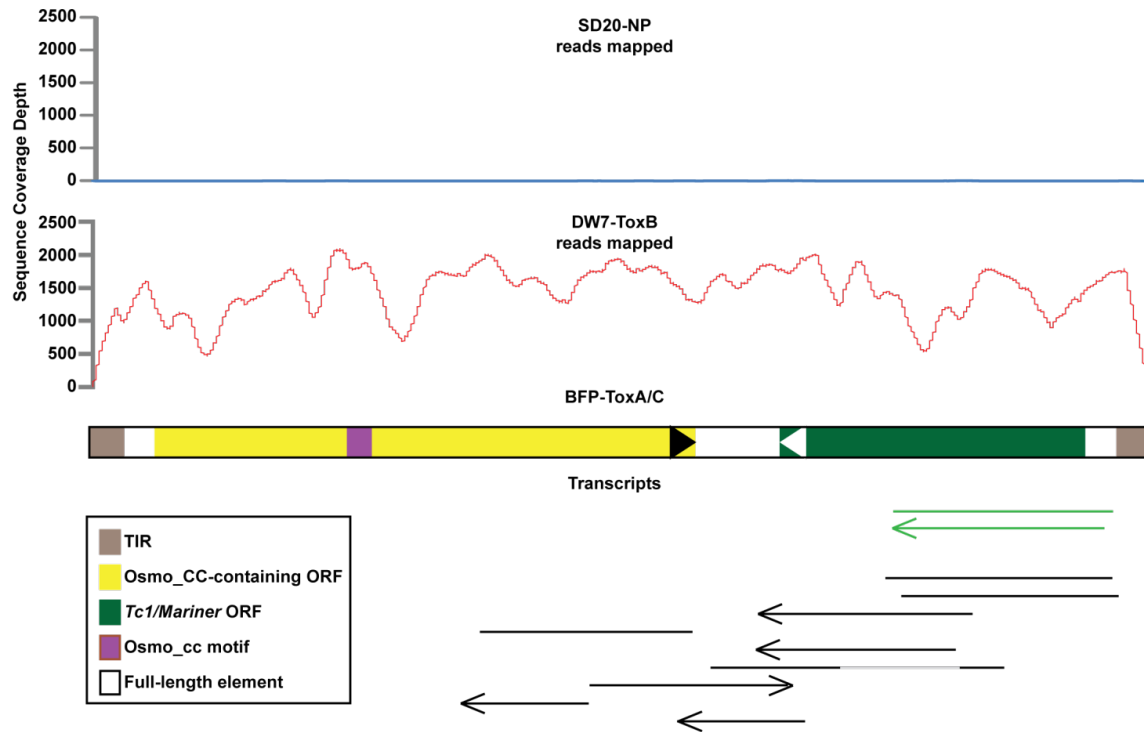

**Figure S5** Transduplication of osmosensory transporter coiled-coil (Osmo-CC) domain in *Ptr*. The bar represents a full length element (3.4-kb) of this repeat family present in the reference genome of BFP-ToxA/C. The graphs on the top are a result of mapping of all Illumina sequencing reads from each isolate to the reference and represents the sequence depth at that position. Arrows and lines below the element representation indicate alignments of transcripts present in various libraries (arrows - polyA tails, light gray - introns).

### A. Putative Histone deacetylase inhibitor cluster in *P. tritici-repentis*

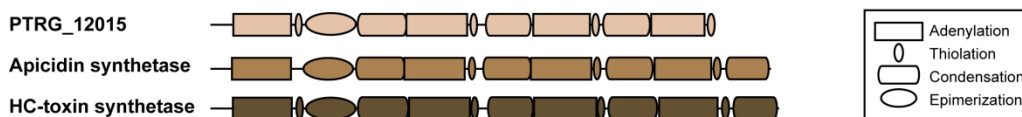

### B. Tox2-like cluster of *P. tritici-repentis*

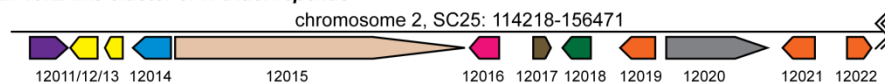

| <i>P. tritici-repentis</i> |                                           | Best BlastP hit  |                      |                                           |         |
|----------------------------|-------------------------------------------|------------------|----------------------|-------------------------------------------|---------|
| Locus                      | Proposed function                         | Accession Number | Organism             | Annotation                                | e value |
| 12011                      | FAD-linked oxidoreductase                 | ACZ66255.1       | <i>F. incarnatum</i> | APS9                                      | 9e-160  |
|                            |                                           | XP_001209092.1   | <i>A. terreus</i>    | conserved hypothetical                    | 4e-104  |
| 12012                      | Short chain dehydrogenase                 | XP_965074.1      | <i>N. crassa</i>     | conserved hypothetical                    | 8e-80   |
|                            |                                           | XP_001239054.1   | <i>C. immitis</i>    | conserved hypothetical                    | 1e-77   |
| 12013                      | Short chain dehydrogenase                 | XP_001820062.1   | <i>A. oryzae</i>     | hypothetical protein                      | 3e-68   |
|                            |                                           | XP_002374381.1   | <i>A. flavus</i>     | short chain type dehydrogenase, putative  | 9e-68   |
| 12014                      | MFS transporter                           | ACZ66257.1       | <i>F. incarnatum</i> | APS11                                     | 1e-123  |
|                            |                                           | sp:Q00357        | <i>C. carbonum</i>   | HC-toxin efflux carrier                   | 2e-102  |
| 12015                      | NRPS                                      | ACZ66258.1       | <i>F. incarnatum</i> | APS1                                      | 0.0     |
|                            |                                           | sp:Q01886.2      | <i>C. carbonum</i>   | HC-toxin synthetase                       | 0.0     |
| 12016                      | Basic leucine zipper transcription factor | ACZ66248.1       | <i>F. incarnatum</i> | APS2                                      | 2e-26   |
|                            |                                           | sp:O74205        | <i>C. carbonum</i>   | Transcription factor ToxE                 | 2e-16   |
| 12017                      | Thioesterase                              | XP_001799397.1   | <i>S. nodorum</i>    | hypothetical protein SNOG_09095           | 2e-24   |
|                            |                                           | XP_002378766.1   | <i>A. flavus</i>     | hypothetical protein                      | 1e-23   |
| 12018                      | Aminotransferase                          | sp:Q9Y885.1      | <i>C. carbonum</i>   | Aminotransferase ToxF                     | 9e-123  |
|                            |                                           | ACZ66250.1       | <i>F. incarnatum</i> | APS4                                      | 6e-105  |
| 12019                      | cytochrome P450                           | XP_001555869.1   | <i>B. fuckeliana</i> | hypothetical protein                      | 4e-105  |
|                            |                                           | XP_001795303     | <i>S. nodorum</i>    | hypothetical protein                      | 1e-96   |
| 12020                      | Fatty acid synthase                       | ACZ66251.1       | <i>F. incarnatum</i> | APS5                                      | 0.0     |
|                            |                                           | XP_002146311.1   | <i>P. marneffeii</i> | 3-oxoacyl-[acyl-carrier-protein] synthase | 0.0     |
| 12021                      | cytochrome P450                           | XP_001275091.1   | <i>A. clavatus</i>   | benzoate 4-monooxygenase, cytochrome P450 | 3e-134  |
|                            |                                           | ACZ66253.1       | <i>F. incarnatum</i> | APS7                                      | 8e-125  |
| 12022                      | cytochrome P450                           | ACZ66254.1       | <i>F. incarnatum</i> | APS8                                      | 2e-109  |
|                            |                                           | XP_002477830.1   | <i>T. stipitatus</i> | cytochrome P450, putative                 | 2e-76   |

**Figure S6** Modular architecture and biosynthetic cluster of a putative histone deacetylase inhibitor biosynthetic cluster in *P. tritici-repentis*. (A) Modular architecture of PTRG\_12015, APS1 (Apicidin synthetase) and HTS1 (HC-toxin synthetase). Domains (Adenylation, Thiolation, Condensation, and Epimerization) and spacing are to scale. (B) Putative biosynthetic cluster containing PTRG\_12015. Putative open reading frames are designated as arrows. Proteins with similar function are coded with a similar color. Blastp search was performed against the NCBI nr database. Proposed function as determined by KOG or GO classification.

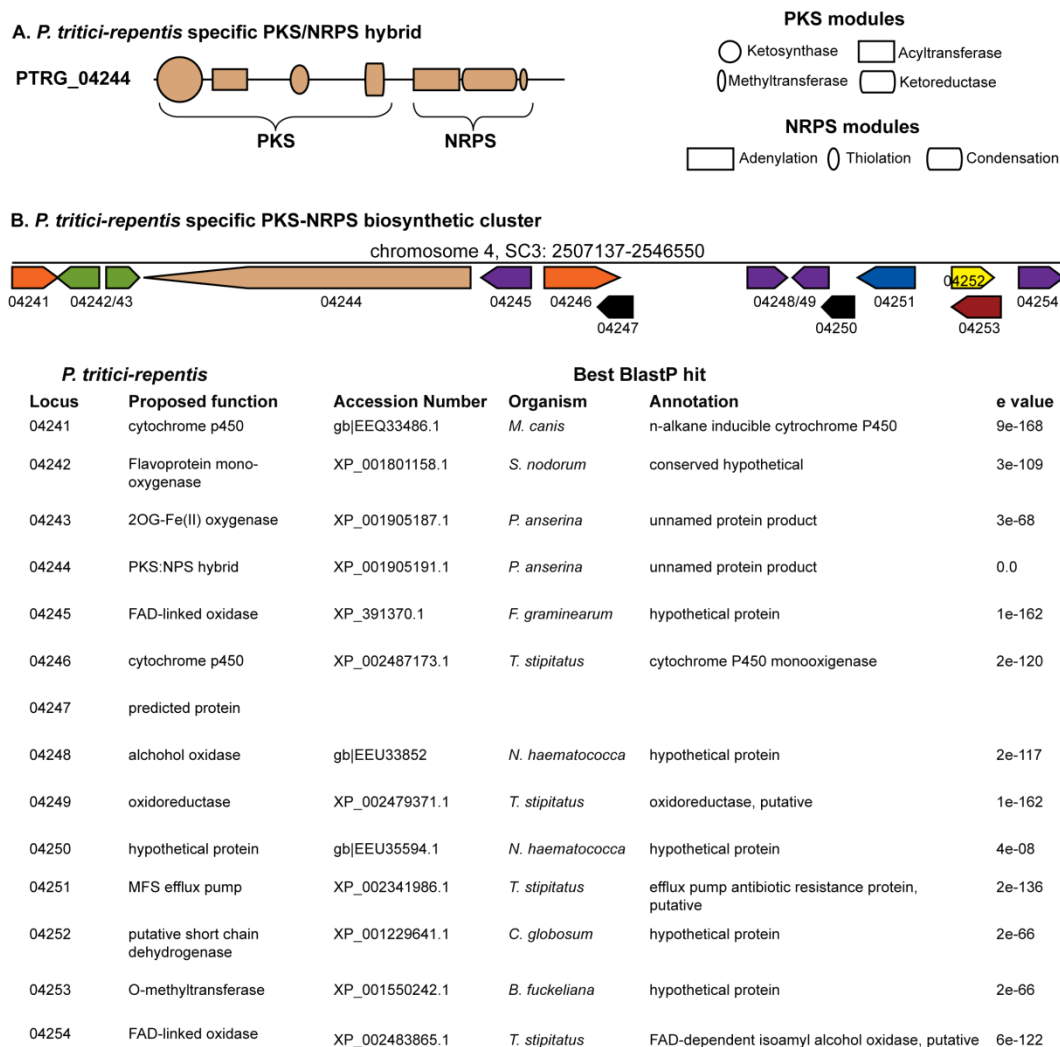

**Figure S7** Modular architecture and biosynthetic cluster of a *P. tritici-repentis*-specific PKS/NRPS hybrid. (A) Modular architecture of PTRG\_04244. Domains and spacing are to scale. (B) Putative biosynthetic cluster containing PTRG\_04244. Putative proteins are designated as arrows. Proteins with similar function are coded with a similar color. Blastp search against GenBank nr database. Proposed function as determined by KOG or GO classification.

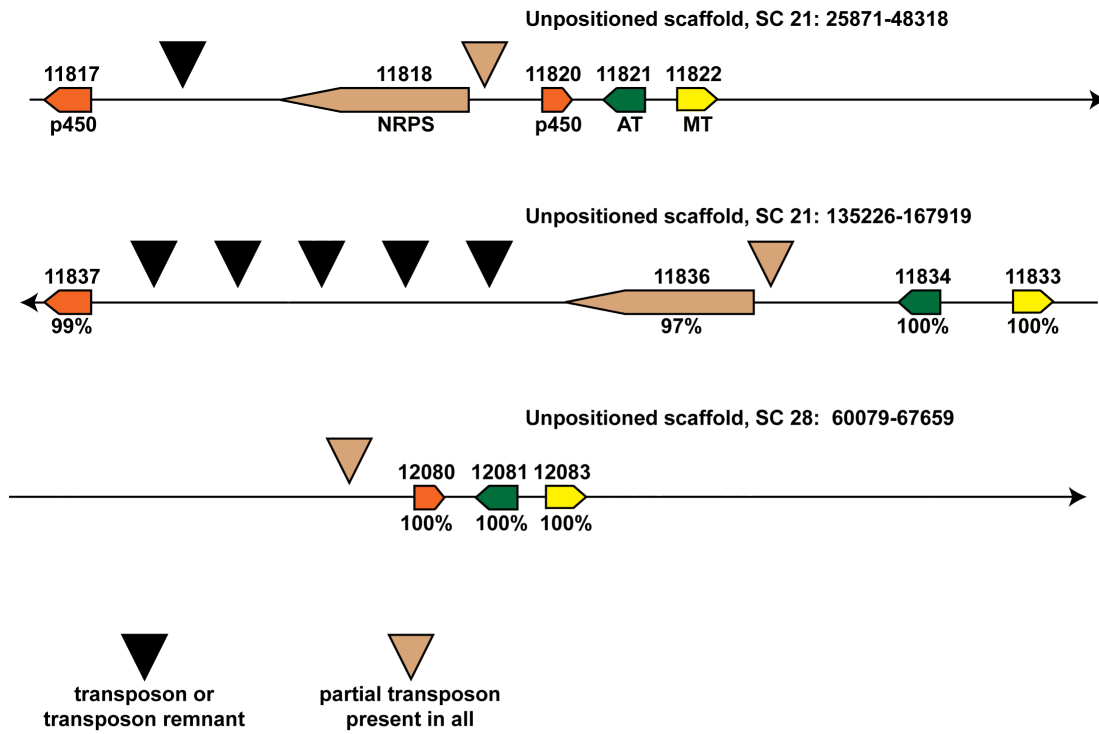

**Figure S8** Duplicated genomic regions associated with the NRPSs PTRG\_11818 & 11836. Putative proteins are designated as arrows. Proteins with similar function are coded with similar color. AT - acyltransferase; MT - methyltransferase. Protein coding regions and spacing between are to scale. Numbers above boxes indicate locus position in the reference. Numbers beneath boxes represent the % identity of the proteins relative to PTRG\_11817 through 11822. Triangles represent transposons or transposon remnants.

**Table S1** *P. tritici-repentis* isolates used in this study

| Isolate name | Race | Geographic location | Path/non-path | Analyses                 |
|--------------|------|---------------------|---------------|--------------------------|
| BFP-ToxA/C   | 1    | S. Dakota, USA      | Path          | Reference Genome/EST/PCR |
| ASC1         | 1    | Manitoba, Canada    | Path          | PCR                      |
| 86-124       | 2    | Manitoba, Canada    | Path          | PCR                      |
| D308         | 3    | Manitoba, Canada    | Path          | PCR                      |
| DW2          | 5    | N. Dakota, USA      | Path          | PCR                      |
| DW7          | 5    | N. Dakota, USA      | Path          | Resequencing             |
| SO3          | ?    | Oregon, USA         | Path          | EST/PCR                  |
| SD20-NP      | 4    | S. Dakota, USA      | Non-path      | Resequencing/EST/PCR     |
| 90-2         | 4    | Manitoba, Canada    | Non-path      | PCR                      |
| 98-31-2      | 4    | N. Dakota, USA      | Non-path      | PCR                      |

**Table S2** *P. tritici-repentis* reference genome libraries sequenced

---

| Library      | Reads          | Physical Coverage (Fold) | Sequence Coverage * (Fold) |
|--------------|----------------|--------------------------|----------------------------|
| 4kb Plasmid  | 266,377        | 14                       | 4.73                       |
| 10kb Plasmid | 56,616         | 9                        | 1.11                       |
| 40kb Fosmid  | 64,483         | 35                       | 1.09                       |
| <b>Total</b> | <b>387,476</b> | <b>58</b>                | <b>6.93</b>                |

---

\* Q20 base coverage

**Table S3** *P. tritici-repentis* assembly anchored to the optical maps

| Optical Linkage group | Estimated Size (Mb) | Mapped Scaffolds | Scaffold Size (Mb) |
|-----------------------|---------------------|------------------|--------------------|
| chr1                  | 10.166              | 10, 33, 18,1,17  | 9.504              |
| chr2                  | 5.206               | 16,2,25,23       | 4.322              |
| chr3                  | 3.708               | 12,14,13         | 3.361              |
| chr4                  | 3.301               | 3                | 3.079              |
| chr5                  | 3.151               | 5                | 2.677              |
| chr6                  | 2.951               | 4                | 2.787              |
| chr7                  | 2.753               | 30,15,11         | 2.612              |
| chr8                  | 2.391               | 8,24,26          | 2.115              |
| chr9                  | 2.287               | 9,22,27          | 2.026              |
| chr10                 | 2.204               | 6                | 1.985              |
| chr11                 | 2.113               | 7                | 1.888              |
| <b>Total</b>          | <b>40.231</b>       |                  | <b>36.355</b>      |

**Table S4** Illumina sequenced *P. tritici-repentis* isolate read alignment under different stringencies

|                             | All repeats/Best hit* |              | No repeats/Best hit* |       | No repeats/Unique hit** |       |
|-----------------------------|-----------------------|--------------|----------------------|-------|-------------------------|-------|
|                             | (Low Stringency)      |              | (Medium Stringency)  |       | (High Stringency)       |       |
|                             | DW7                   | SD20         | DW7                  | SD20  | DW7                     | SD20  |
| PE alignment (M)            | 75.59                 | 56.87        | 22.18                | 44.10 | 21.65                   | 36.40 |
| SE alignment (M)            | 5.80                  | 9.11         | 0.52                 | 3.43  | 0.41                    | 2.20  |
| Unmapped (M)                | 2.92                  | 17.26        | 6.72                 | 19.56 | 7.36                    | 28.49 |
| Paired read count (M)       | 14.71                 | 33.54        |                      |       |                         |       |
| <b>Total read count (M)</b> | <b>29.42</b>          | <b>67.09</b> |                      |       |                         |       |

\*Best hit = up to 4 mismatches; \*\*Unique = no mismatches; Mapping performed with SOAP2



**Table S5 Repeat families in *P. tritici-repentis***

Available for download at <http://www.g3journal.org/lookup/suppl/doi:10.1534/g3.112.004044/-/DC1>.

**Table S6 EST libraries produced to facilitate gene calling**

| Libraries  | Pathogenicity | Conditions    | Reads  | Spans  | Average Sequence Identity % |
|------------|---------------|---------------|--------|--------|-----------------------------|
| Pt-1C(BFP) | Yes-Race 1    | In planta     | 10,083 | 3,088  |                             |
| Pt-1C(BFP) | Yes-Race 1    | Mixed culture | 10,444 | 12,198 |                             |
| SO3-P      | Yes-Race 9    | Mixed culture | 10,185 | 12,115 | 98.08                       |
| SD20-NP    | No-Race 4     | Mixed culture | 10,328 | 8,195  | 98.2                        |

**Table S7 Serine codon usage in *P. tritici-repentis***

| Ser codon    | % usage    | # of codons   |
|--------------|------------|---------------|
| AGC          | 19.4       | 118705        |
| AGT          | 12.4       | 76150         |
| TCA          | 18.4       | 112959        |
| TCC          | 16.4       | 100858        |
| TCG          | 16.8       | 103107        |
| TCT          | 16.6       | 101583        |
| <b>Total</b> | <b>100</b> | <b>613362</b> |

**Table S8 Top five repeat families shared between the *P. tritici-repentis* reference genome and resequenced pathogenic and non-pathogenic isolates**

|                            | Reference family | Repeat class            | Annotation*                                                             |
|----------------------------|------------------|-------------------------|-------------------------------------------------------------------------|
| Pathogenic<br>- DW7-ToxB   | 8                | DNA transposon          | <i>hAT</i> superfamily; similar to Tfo1 from <i>F. oxysporum</i>        |
|                            | 63               | DNA transposon          | <i>hAT</i> superfamily; similar to Restless                             |
|                            | 105              | DNA transposon          | <i>Tc1/Mariner</i> superfamily                                          |
|                            | 49               | DNA transposon          | <i>Tc1/Mariner</i> superfamily; similar to Molly from <i>S. nodorum</i> |
|                            | 619              | DNA transposon          | <i>hAT</i> superfamily; similar to Restless                             |
| Non-pathogenic-<br>SD20-NP | 26               | Non-LTR retrotransposon | similar to Tad1 of <i>Blumeria</i>                                      |
|                            | 27               | Non-LTR retrotransposon | similar to Tad1 of <i>Blumeria</i>                                      |
|                            | 238              | Non-LTR retrotransposon | similar to Tad1 of <i>Blumeria</i>                                      |
|                            | 116              | unknown                 |                                                                         |
|                            | 293              | unknown                 |                                                                         |

\*Repeat annotation performed in Censor

**Table S9** Count of identical 16-mers in 1X sampling of resequencing reads of DW7-ToxB and SD20-NP

| Times present | DW7-ToxB |            | SD20-NP  |            |
|---------------|----------|------------|----------|------------|
|               | Count    | % of Total | Count    | % of Total |
| 1 to 10       | 21571304 | 88.03      | 22331413 | 94.66      |
| 11 to 20      | 1585463  | 6.47       | 534634   | 2.27       |
| 21 to 30      | 523010   | 2.13       | 309650   | 1.31       |
| 31 to 40      | 251216   | 1.03       | 250797   | 1.06       |
| 41 to 50      | 113859   | 0.46       | 102102   | 0.43       |
| 51 to 60      | 24937    | 0.10       | 41720    | 0.18       |
| 61 to 70      | 7766     | 0.03       | 9912     | 0.04       |
| 71 to 80      | 3857     | 0.02       | 3513     | 0.01       |
| 81 to 90      | 6792     | 0.03       | 1368     | 0.01       |
| 91 to 100     | 4498     | 0.02       | 382      | 0.00       |
| 101 to 110    | 2746     | 0.01       | 631      | 0.00       |
| 111 to 120    | 1566     | 0.01       | 737      | 0.00       |
| 121 to 130    | 2732     | 0.01       | 280      | 0.00       |
| 131 to 140    | 6719     | 0.03       | 0        | 0.00       |
| 141 to 150    | 11469    | 0.05       | 378      | 0.00       |
| 151 to 160    | 11769    | 0.05       | 2237     | 0.01       |
| 161 to 170    | 4064     | 0.02       | 900      | 0.00       |
| 171 to 180    | 4337     | 0.02       | 0        | 0.00       |
| 181 to 190    | 5051     | 0.02       | 0        | 0.00       |
| 191 to 200    | 4506     | 0.02       | 0        | 0.00       |
| 201 to 210    | 4314     | 0.02       | 0        | 0.00       |
| 211 to 220    | 3851     | 0.02       | 0        | 0.00       |
| 221 to 230    | 8033     | 0.03       | 0        | 0.00       |
| 231 to 240    | 12958    | 0.05       | 0        | 0.00       |
| 241 to 250    | 16405    | 0.07       | 0        | 0.00       |
| 251 to 260    | 11951    | 0.05       | 0        | 0.00       |
| 261 to 270    | 11559    | 0.05       | 0        | 0.00       |
| 271 to 280    | 9348     | 0.04       | 0        | 0.00       |
| 281 to 290    | 14204    | 0.06       | 0        | 0.00       |
| 291 to 300    | 18206    | 0.07       | 0        | 0.00       |
| 301 to 310    | 21485    | 0.09       | 0        | 0.00       |
| 311 to 320    | 36139    | 0.15       | 0        | 0.00       |
| 321 to 330    | 35316    | 0.14       | 0        | 0.00       |
| 331 to 340    | 38744    | 0.16       | 0        | 0.00       |
| 341 to 350    | 32057    | 0.13       | 0        | 0.00       |
| 351 to 360    | 23219    | 0.09       | 0        | 0.00       |
| 361 to 370    | 10710    | 0.04       | 0        | 0.00       |
| 371 to 380    | 10067    | 0.04       | 0        | 0.00       |

|              |                 |      |                 |      |
|--------------|-----------------|------|-----------------|------|
| 381 to 390   | 11319           | 0.05 | 0               | 0.00 |
| 391 to 400   | 10130           | 0.04 | 0               | 0.00 |
| 401 to 410   | 9831            | 0.04 | 0               | 0.00 |
| 411 to 417   | 6554            | 0.03 | 0               | 0.00 |
| <b>Total</b> | <b>24504061</b> |      | <b>23590654</b> |      |

---

**Table S10 Histone genes present in *P. tritici-repentis***

Available for download at <http://www.g3journal.org/lookup/suppl/doi:10.1534/g3.112.004044/-/DC1>.

**Table S11 Histone genes present in *Puccinia graminis***

Available for download at <http://www.g3journal.org/lookup/suppl/doi:10.1534/g3.112.004044/-/DC1>.



**Table S12 Pfam domains in repeats\***

| PFAM description                                            | # in repeats |
|-------------------------------------------------------------|--------------|
| AMP-binding enzyme                                          | 6            |
| AT hook motif                                               | 26           |
| Bacterial regulatory helix-turn-helix proteins, AraC family | 2            |
| Bacterial regulatory proteins, lacI family                  | 2            |
| Bacterial SH3 domain                                        | 2            |
| Centromere binding protein B, DNA binding                   | 3            |
| 'chromo' (CHRromatin Organisation MODifier) domain          | 32           |
| Condensation domain                                         | 6            |
| Core histone H2A/H2B/H3/H4                                  | 33           |
| DDE superfamily endonuclease                                | 111          |
| hAT family dimerisation domain                              | 178          |
| helix-turn-helix, Psq domain                                | 72           |
| Integrase core domain                                       | 157          |
| LTXXQ motif                                                 | 14           |
| MORN repeat variant                                         | 5            |
| Motilin/ghrelin                                             | 7            |
| Opioid growth factor receptor repeat                        | 2            |
| Osmosensory transporter coiled coil                         | 23           |
| Phosphopantetheine attachment site                          | 8            |
| PPAK motif                                                  | 1            |
| Protein of unknown function (DUF1299)                       | 1            |
| Protein of unknown function (DUF1409)                       | 4            |
| Retrotransposon gag protein                                 | 4            |
| Reverse transcriptase (RNA-dependent DNA polymerase)        | 139          |
| RNase H                                                     | 33           |
| SAMP Motif                                                  | 1            |
| Transposase                                                 | 1            |
| Viral A-type inclusion protein repeat                       | 16           |
| WCCH motif                                                  | 19           |
| WD domain, G-beta repeat                                    | 1            |
| Zinc knuckle                                                | 28           |

\*Pfam domains predicted by Broad Institute and present in custom repeat library

**Table S13** *De novo* assembly of resequenced *P. tritici-repentis* isolates\*

|                          | DW7-ToxB | SD20-NP |
|--------------------------|----------|---------|
| k-mer                    | 41       | 41      |
| # contigs                | 21300    | 40383   |
| largest contig (nt)      | 225936   | 320323  |
| L50 (nt)                 | 39556    | 69524   |
| % contigs > 10 kb        | 85       | 88      |
| % nt in contigs > 500 nt | 98       | 98      |

\* Assembly performed in Velvet

**Table S14 Predicted secretome of *P. tritici-repentis***

Available for download at <http://www.g3journal.org/lookup/suppl/doi:10.1534/g3.112.004044/-/DC1>.

**Table S15 Putative NRPS-containing clusters in the *P. tritici-repentis* reference genome**

| <i>P. tritici-repentis</i> locus | Size (aa) | Putative function                                    |
|----------------------------------|-----------|------------------------------------------------------|
| PTRG_04244                       |           |                                                      |
| PTRG_04241                       | 461       | p450                                                 |
| PTRG_04242                       | 410       | flavoprotein monooxygenase                           |
| PTRG_04243                       | 322       | 2OG-Fe(II) oxygenase                                 |
| PTRG_04244                       | 3850      | pks:nrps hybrid                                      |
| PTRG_04245                       | 558       | FAD-linked oxidase                                   |
| PTRG_04246                       | 491       | p450 monooxygenase                                   |
| PTRG_04247                       | 384       | predicted protein                                    |
| PTRG_04248                       | 452       | alcohol oxidase                                      |
| PTRG_04249                       | 407       | oxidoreductase                                       |
| PTRG_04250                       | 169       | hypothetical protein                                 |
| PTRG_04251                       | 557       | MFS efflux pump transporter                          |
| PTRG_04252                       | 297       | putative short chain dehydrogenase                   |
| PTRG_04253                       | 401       | O-methyltransferase                                  |
| PTRG_04254                       | 540       | FAD-linked oxidase                                   |
| PTRG_00447                       |           |                                                      |
| PTRG_00447                       | 1282      | nrps10                                               |
| PTRG_00448                       | 182       |                                                      |
| PTRG_00449                       | 199       |                                                      |
| PTRG_00450                       | 317       | cyclin d-interacting protein                         |
| PTRG_00451                       | 295       | TBP-binding protein, activator of basal transription |
| PTRG_00452                       | 363       | uncharacterized, conserved                           |
| PTRG_00453                       | 347       |                                                      |
| PTRG_00454                       | 421       | p450                                                 |
| PTRG_00455                       | 317       | ubiquitin ligase                                     |
| PTRG_00456                       | 296       | zinc finger protein                                  |
| PTRG_00457                       | 554       | AMP domain                                           |
| PTRG_01683                       |           |                                                      |
| PTRG_01677                       | 548       | oxidoreductase                                       |
| PTRG_01678                       | 603       | Long chain fatty acid acyl-CoA ligase                |
| PTRG_01679                       | 438       |                                                      |
| PTRG_01680                       | 423       | Flavin-containing monooxygenase                      |
| PTRG_01681                       | 1299      | ABC transporter                                      |
| PTRG_01682                       | 219       | N-acetyltransferase                                  |
| PTRG_01683                       | 1841      | nrps6                                                |
| PTRG_01684                       | 475       |                                                      |
| PTRG_01685                       | 360       | tyrosinase                                           |

|            |      |                                                      |
|------------|------|------------------------------------------------------|
| PTRG_01800 |      |                                                      |
| PTRG_01796 | 1270 | splicing coactivator                                 |
| PTRG_01797 | 539  | MFS                                                  |
| PTRG_01798 | 89   |                                                      |
| PTRG_01799 | 1489 | ABC transporter                                      |
| PTRG_01800 | 6909 | nrps4                                                |
| PTRG_01801 | 79   |                                                      |
| PTRG_01802 | 369  | Malic acid transporter                               |
| PTRG_01803 | 187  | secreted protein                                     |
| PTRG_01804 | 172  |                                                      |
| PTRG_01805 | 507  | p450                                                 |
| PTRG_01806 | 689  | F-box domain                                         |
| PTRG_01807 | 294  | cyclin-like F-box domain                             |
| PTRG_08276 |      |                                                      |
| PTRG_08272 | 858  | translation initiation factor                        |
| PTRG_08273 | 906  | YAKI-serine threonine kinase                         |
| PTRG_08274 | 529  | Flavin-containing monooxygenase                      |
| PTRG_08275 | 1310 | ABC transporter                                      |
| PTRG_08276 | 5326 | nrps2                                                |
| PTRG_08280 | 402  | Lipid phosphatase, PAP2 family                       |
| PTRG_08281 | 161  | DNA-binding protein                                  |
| PTRG_08282 | 476  | mRNA splicing factor                                 |
| PTRG_08283 | 276  | transcription factor                                 |
| PTRG_08284 | 1049 | von Willebrands; may be two proteins or misannotated |
| PTRG_08285 | 743  | AAA+-type ATPase                                     |
| PTRG_08286 | 706  |                                                      |
| PTRG_08287 | 855  | RNA-binding protein                                  |
| PTRG_08288 | 445  | Hormone sensitive-lipase                             |
| PTRG_08289 | 165  |                                                      |
| PTRG_08290 | 144  | DNA methyltransferase                                |
| PTRG_08291 | 349  |                                                      |
| PTRG_09101 |      |                                                      |
| PTRG_09095 | 1432 | ABC transporter                                      |
| PTRG_09096 | 328  | RTA1-like protein                                    |
| PTRG_09097 | 391  | Aminotransferase, class IV                           |
| PTRG_09098 | 2054 | Fatty acid synthase, beta                            |
| PTRG_09099 | 1590 | Beta-ketoacyl synthase                               |
| PTRG_09100 | 537  | P450                                                 |
| PTRG_09101 | 6024 | nrps                                                 |
| PTRG_09102 | 446  | kynurenine 3-monooxygenase                           |

|            |      |                                           |
|------------|------|-------------------------------------------|
| PTRG_09103 | 552  | MFS                                       |
| PTRG_12015 |      |                                           |
| PTRG_12011 | 597  | FAD-linked oxidoreductase                 |
| PTRG_12012 | 305  | Short chain dehydrogenase                 |
| PTRG_12013 | 266  | Short chain dehydrogenase                 |
| PTRG_12014 | 564  | MFS transporter                           |
| PTRG_12015 | 4634 | nrps HDAC                                 |
| PTRG_12016 | 470  | Basic leucine zipper transcription factor |
| PTRG_12017 | 242  | Thioesterase                              |
| PTRG_12018 | 339  | Aminotransferase                          |
| PTRG_12019 | 532  | Cytochrome P450                           |
| PTRG_12020 | 1618 | Fatty acid synthase                       |
| PTRG_12021 | 437  | Cytochrome P450                           |
| PTRG_12022 | 338  | Cytochrome P450                           |

---

**Table S16 Putative polyketide synthetase gene of *P. tritici-repentis***

Available for download at <http://www.g3journal.org/lookup/suppl/doi:10.1534/g3.112.004044/-/DC1>.

**Table S17 *Pyrenophora tritici-repentis*-specific secreted proteins as predicted in Blast2GO**

| Locus                             | Size (aa) | % Cys | HMM             | E-value        | Present DW7 | Present SD20 | EST           |              |               |               |
|-----------------------------------|-----------|-------|-----------------|----------------|-------------|--------------|---------------|--------------|---------------|---------------|
|                                   |           |       |                 |                |             |              | Race1 culture | Race1 Planta | Race4 culture | Race9 culture |
| Race 1 specific                   |           |       |                 |                |             |              |               |              |               |               |
| PTRG_05296                        | 118       | 0.85  |                 |                | no          | no           |               |              |               |               |
| PTRG_04919                        | 123       | 0.82  |                 |                | no          | no           |               |              |               |               |
| PTRG_10524                        | 59        | 6.9   |                 |                | no          | no           |               |              |               |               |
| Pathogen Specific                 |           |       |                 |                |             |              |               |              |               |               |
| PTRG_06853                        | 122       | 1.65  |                 |                | yes         | no           |               |              |               |               |
| PTRG_11888                        | 86        | 14.12 |                 |                | yes         | no           | 7             | 8            |               | 4             |
| PTRG_12138                        | 73        | 9.72  |                 |                | yes         | no           | 14            | 2            |               |               |
| Discontinuously distributed       |           |       |                 |                |             |              |               |              |               |               |
| PTRG_09431                        | 73        | 4.17  |                 |                | no          | yes          |               |              |               |               |
| Present in all sequenced isolates |           |       |                 |                |             |              |               |              |               |               |
| PTRG_00723                        | 184       | 0.55  |                 |                | yes         | yes          |               |              |               |               |
| PTRG_05020                        | 85        | 0     | GRP             | 0.0022         | yes         | yes          |               |              |               | 2             |
| PTRG_10257                        | 61        | 0     |                 |                | yes         | yes          | 2             |              | 14            | 7             |
| PTRG_00384                        | 63        | 1.61  |                 |                | yes         | yes          |               |              |               |               |
| PTRG_00529                        | 52        | 0     |                 |                | yes         | yes          |               |              |               |               |
| PTRG_00558                        | 80        | 10.13 |                 |                | yes         | yes          |               | 2            |               |               |
| PTRG_00758                        | 75        | 4.05  |                 |                | yes         | yes          |               |              |               |               |
| PTRG_00935                        | 54        | 9.43  |                 |                | yes         | yes          |               |              |               |               |
| PTRG_01132                        | 87        | 2.33  |                 |                | yes         | yes          |               |              |               |               |
| PTRG_01371                        | 54        | 11.32 |                 |                | yes         | yes          |               | 2            |               | 3             |
| PTRG_01382                        | 201       | 0     |                 |                | yes         | yes          |               |              |               |               |
| PTRG_01617                        | 59        | 0     |                 |                | yes         | yes          |               |              |               |               |
| PTRG_01675                        | 55        | 3.7   |                 |                | yes         | yes          |               |              |               |               |
| PTRG_01823                        | 133       | 6.06  |                 |                | yes         | yes          |               |              |               |               |
| PTRG_01890                        | 50        | 4.08  |                 |                | yes         | yes          |               |              |               |               |
| PTRG_01923                        | 78        | 7.79  |                 |                | yes         | yes          |               |              |               |               |
| PTRG_02034                        | 128       | 3.94  |                 |                | yes         | yes          |               |              |               |               |
| PTRG_02202                        | 90        | 2.25  |                 |                | yes         | yes          |               |              |               |               |
| PTRG_02218                        | 92        | 3.3   |                 |                | yes         | yes          |               |              |               |               |
| PTRG_02241                        | 99        | 6.12  |                 |                | yes         | yes          |               |              |               |               |
| PTRG_02456                        | 90        | 1.12  |                 |                | yes         | yes          |               |              |               |               |
| PTRG_02606                        | 91        | 5.56  | PRA1<br>Innexin | 0.098<br>0.036 | yes         | yes          |               |              |               |               |
| PTRG_02982                        | 76        | 10.67 |                 |                | yes         | yes          |               |              |               |               |
| PTRG_03151                        | 69        | 1.47  |                 |                | yes         | yes          |               |              |               |               |
| PTRG_03183                        | 50        | 4.08  |                 |                | yes         | yes          | 2             | 1            |               |               |



|            |     |      |               |        |     |     |   |   |
|------------|-----|------|---------------|--------|-----|-----|---|---|
| PTRG_03424 | 129 | 6.25 |               |        | yes | yes |   |   |
| PTRG_03447 | 65  | 0    |               |        | yes | yes |   |   |
| PTRG_03460 | 79  | 2.56 |               |        | yes | yes |   |   |
| PTRG_03545 | 92  | 6.59 |               |        | yes | yes |   |   |
| PTRG_03740 | 137 | 0.74 |               |        | yes | yes |   |   |
| PTRG_03833 | 155 | 6.49 |               |        | yes | yes |   |   |
| PTRG_03972 | 117 | 3.45 |               |        | yes | yes |   |   |
| PTRG_04061 | 95  | 7.45 |               |        | yes | yes |   |   |
| PTRG_04438 | 132 | 3.05 |               |        | yes | yes |   |   |
| PTRG_04467 | 75  | 1.35 |               |        | yes | yes |   |   |
| PTRG_04476 | 130 | 3.88 |               |        | yes | yes |   |   |
| PTRG_04489 | 137 | 3.68 |               |        | yes | yes |   |   |
| PTRG_04511 | 57  | 5.36 |               |        | yes | yes |   |   |
| PTRG_04567 | 113 | 6.25 | Peptidase_M19 | 0.076  | yes | yes | 2 | 2 |
|            |     |      | Meleagrin     | 0.089  |     |     |   |   |
| PTRG_04595 | 127 | 3.97 |               |        | yes | yes |   |   |
| PTRG_04645 | 109 | 3.7  |               |        | yes | yes |   |   |
| PTRG_04835 | 99  | 8.16 |               |        | yes | yes | 2 |   |
| PTRG_04870 | 73  | 9.72 |               |        | yes | yes |   |   |
| PTRG_05019 | 142 | 0    |               |        | yes | yes |   |   |
| PTRG_05021 | 143 | 1.41 |               |        | yes | yes |   |   |
| PTRG_05037 | 130 | 1.55 |               |        | yes | yes |   |   |
| PTRG_05069 | 95  | 6.38 |               |        | yes | yes |   |   |
| PTRG_05127 | 95  | 6.38 |               |        | yes | yes |   |   |
| PTRG_05187 | 141 | 0    |               |        | yes | yes | 8 | 2 |
| PTRG_05203 | 130 | 0.78 |               |        | yes | yes |   | 2 |
| PTRG_05392 | 96  | 3.16 |               |        | yes | yes |   |   |
| PTRG_05427 | 81  | 1.25 | DEC-1_N       | 0.0014 | yes | yes |   |   |
|            |     |      | PLRV_ORF5     | 0.048  |     |     |   |   |
| PTRG_05658 | 110 | 7.34 |               |        | yes | yes |   |   |
| PTRG_05788 | 395 | 0.51 |               |        | yes | yes |   | 2 |
| PTRG_05858 | 77  | 0    |               |        | yes | yes |   |   |
| PTRG_05999 | 77  | 2.63 |               |        | yes | yes |   |   |
| PTRG_06015 | 56  | 1.82 |               |        | yes | yes |   |   |
| PTRG_06042 | 119 | 3.39 |               |        | yes | yes |   |   |
| PTRG_06295 | 57  | 0    |               |        | yes | yes | 2 |   |
| PTRG_06429 | 140 | 6.47 |               |        | yes | yes | 2 |   |
| PTRG_06505 | 295 | 0    |               |        | yes | yes |   |   |
| PTRG_06517 | 104 | 7.77 |               |        | yes | yes |   |   |
| PTRG_06556 | 94  | 3.23 |               |        | yes | yes |   |   |
| PTRG_06557 | 52  | 1.96 |               |        | yes | yes |   | 2 |
| PTRG_06608 | 53  | 1.92 |               |        | yes | yes |   |   |
| PTRG_07001 | 69  | 8.82 |               |        | yes | yes |   |   |

|            |     |       |               |           |     |     |    |   |   |   |
|------------|-----|-------|---------------|-----------|-----|-----|----|---|---|---|
| PTRG_07260 | 292 | 3.78  |               |           | yes | yes |    |   |   |   |
| PTRG_07271 | 88  | 5.75  |               |           | yes | yes |    |   |   |   |
| PTRG_07510 | 74  | 1.37  |               |           | yes | yes |    |   |   |   |
| PTRG_07515 | 128 | 7.09  |               |           | yes | yes |    |   |   |   |
| PTRG_07580 | 168 | 0     | PIR           | 0.0000046 | yes | yes | 10 | 2 | 6 | 4 |
| PTRG_07935 | 80  | 1.27  | Peptidase_M66 | 0.0094    | yes | yes |    |   |   |   |
| PTRG_07936 | 164 | 3.68  |               |           | yes | yes |    |   |   |   |
| PTRG_08136 | 76  | 2.67  | Mfp-3         | 0.032     | yes | yes |    |   |   |   |
| PTRG_08379 | 69  | 2.94  |               |           | yes | yes | 8  |   | 2 |   |
| PTRG_08398 | 107 | 1.89  |               |           | yes | yes |    |   |   |   |
| PTRG_08448 | 130 | 3.1   |               |           | yes | yes |    |   |   |   |
| PTRG_08572 | 87  | 16.28 |               |           | yes | yes | 2  |   |   |   |
| PTRG_08636 | 60  | 0     |               |           | yes | yes |    |   |   |   |
| PTRG_09109 | 92  | 6.59  |               |           | yes | yes |    |   |   |   |
| PTRG_09139 | 105 | 3.85  |               |           | yes | yes | 6  |   |   |   |
| PTRG_09257 | 293 | 1.71  |               |           | yes | yes |    |   |   |   |
| PTRG_09351 | 77  | 10.53 |               |           | yes | yes |    |   |   | 2 |
| PTRG_09380 | 96  | 7.37  |               |           | yes | yes | 2  |   | 1 |   |
| PTRG_09458 | 49  | 4.17  |               |           | yes | yes | 2  |   |   |   |
| PTRG_09580 | 459 | 1.97  |               |           | yes | yes |    |   |   |   |
| PTRG_09958 | 97  | 6.25  |               |           | yes | yes |    |   |   |   |
| PTRG_10036 | 54  | 1.89  |               |           | yes | yes |    |   |   |   |
| PTRG_10069 | 70  | 4.35  |               |           | yes | yes |    |   |   |   |
| PTRG_10109 | 153 | 0.66  |               |           | yes | yes | 8  |   | 2 | 2 |
| PTRG_10127 | 119 | 2.54  |               |           | yes | yes | 2  |   |   | 4 |
| PTRG_10138 | 130 | 0     |               |           | yes | yes |    |   |   |   |
| PTRG_10852 | 61  | 5     |               |           | yes | yes |    |   |   |   |
| PTRG_10951 | 142 | 1.42  |               |           | yes | yes |    |   |   |   |
| PTRG_10990 | 123 | 3.28  |               |           | yes | yes |    |   |   |   |
| PTRG_11024 | 51  | 4     |               |           | yes | yes |    |   |   |   |
| PTRG_11036 | 135 | 4.48  |               |           | yes | yes |    |   |   |   |
| PTRG_11089 | 64  | 9.52  |               |           | yes | yes | 6  | 3 |   | 2 |
| PTRG_11261 | 70  | 5.8   |               |           | yes | yes |    |   |   |   |
| PTRG_11351 | 94  | 0     |               |           | yes | yes |    |   |   |   |
| PTRG_11361 | 122 | 4.96  |               |           | yes | yes |    |   |   |   |
| PTRG_11416 | 60  | 1.69  |               |           | yes | yes | 2  |   |   |   |
| PTRG_11417 | 65  | 4.69  | PsaX          | 0.05      | yes | yes |    |   |   |   |

**Table S18 Total numbers of predicted CAZymes in PTR and selected ascomycetes**

| Species                             | GH  | GT  | PL | CE | CBM | EXPN |
|-------------------------------------|-----|-----|----|----|-----|------|
| <i>Pyrenophora tritici-repentis</i> | 245 | 91  | 10 | 39 | 45  | 2    |
| <i>Mycosphaerella graminicola</i>   | 191 | 99  | 3  | 18 | 21  | 3    |
| <i>Trichoderma reesei</i>           | 192 | 93  | 6  | 17 | 48  | 4    |
| <i>Fusarium graminearum</i>         | 247 | 102 | 21 | 44 | 67  | 4    |
| <i>Neurospora crassa</i>            | 173 | 76  | 4  | 22 | 42  | 1    |
| <i>Magnaporthe grisea</i>           | 232 | 92  | 5  | 47 | 65  | 1    |
| <i>Aspergillus nidulans</i>         | 251 | 91  | 21 | 31 | 41  | 1    |
| <i>Stagonospora nodorum</i>         | 273 | 89  | 10 | 50 | 61  | 4    |

GH = glycoside hydrolases; GT = glycosyl transferases; PL = polysaccharide lyases; CE = carbohydrate esterases; CBM = carbohydrate binding modules; EXPN = distantly related to plant expansins. Predicted CAZymes were identified using the carbohydrate-active enzymes database tools

**Table S19 Comparison of pectinolytic enzymes in *P. tritici-repentis* vs. other grass and non-grass plant pathogens**

| Species                                                           | PL family |    |   |   |    |    |           | GH family |    |    |    |     | Total     |
|-------------------------------------------------------------------|-----------|----|---|---|----|----|-----------|-----------|----|----|----|-----|-----------|
|                                                                   | 1         | 3  | 4 | 9 | 11 | 20 | Total     | 28        | 78 | 88 | 95 | 105 |           |
| <i>Magnaporthe grisea</i> 70-15                                   | 2         | 1  | 1 | 0 | 0  | 1  | <b>5</b>  | 3         | 1  | 1  | 1  | 3   | <b>9</b>  |
| <i>Pyrenophora tritici-repentis</i> Pt-1C-BFP                     | 3         | 3  | 4 | 0 | 0  | 0  | <b>10</b> | 6         | 3  | 1  | 2  | 3   | <b>15</b> |
| <i>Phaeosphaeria nodorum</i> SN15*                                | 4         | 2  | 4 | 0 | 0  | 0  | <b>10</b> | 4         | 4  | 1  | 2  | 3   | <b>14</b> |
| <i>Gibberella zeae</i> PH-1 ( <i>F. graminearum</i> )             | 9         | 7  | 3 | 1 | 0  | 1  | <b>21</b> | 6         | 7  | 1  | 2  | 3   | <b>19</b> |
| <i>Gibberella moniliformis</i> 7600 ( <i>F. verticillioides</i> ) | 11        | 7  | 3 | 2 | 0  | 0  | <b>23</b> | 9         | 9  | 2  | 1  | 3   | <b>24</b> |
| <i>Fusarium oxysporum</i> f. sp. <i>lycopersici</i> 4286          | 11        | 7  | 3 | 2 | 1  | 0  | <b>24</b> | 15        | 14 | 3  | 2  | 5   | <b>39</b> |
| <i>Verticillium albo-atrum</i> VaMs.102                           | 16        | 11 | 4 | 2 | 1  | 0  | <b>34</b> | 12        | 9  | 4  | 2  | 3   | <b>30</b> |
| <i>Verticillium dahliae</i> VdLs.17                               | 17        | 11 | 4 | 2 | 1  | 0  | <b>35</b> | 12        | 9  | 4  | 2  | 4   | <b>31</b> |

\* Data from Amselem et al. 2011

**Table S20 GO enrichment analysis of ESTs present in the in planta library\***

| GO Term    | Name                                                                            | FDR    | FWER    | single test p-Value |
|------------|---------------------------------------------------------------------------------|--------|---------|---------------------|
| GO:0003735 | structural constituent of ribosome                                              | 2E-09  | 7.1E-09 | 7.9E-14             |
| GO:0046933 | hydrogen ion transporting ATP synthase activity, rotational mechanism           | 0.0003 | 0.002   | 0.000017            |
| GO:0008553 | hydrogen-exporting ATPase activity, phosphorylative mechanism                   | 0.0048 | 0.047   | 0.00033             |
| GO:0015935 | small ribosomal subunit                                                         | 0.0052 | 0.051   | 0.00037             |
| GO:0045263 | proton-transporting ATP synthase complex, coupling factor F(o)                  | 0.0088 | 0.092   | 0.00058             |
| GO:0043581 | mycelium development                                                            | 0.017  | 0.18    | 0.0013              |
| GO:0031176 | endo-1,4-beta-xylanase activity                                                 | 0.02   | 0.29    | 0.0021              |
| GO:0030245 | cellulose catabolic process                                                     | 0.02   | 0.29    | 0.0021              |
| GO:0008810 | cellulase activity                                                              | 0.043  | 0.54    | 0.0035              |
| GO:0004784 | superoxide dismutase activity                                                   | 0.043  | 0.54    | 0.0035              |
| GO:0006414 | translational elongation                                                        | 0.043  | 0.54    | 0.0035              |
| GO:0006801 | superoxide metabolic process                                                    | 0.053  | 0.65    | 0.0054              |
| GO:0009279 | cell outer membrane                                                             | 0.075  | 0.8     | 0.0069              |
| GO:0003871 | 5-methyltetrahydropteroyltriglutamate-homocysteine S-methyltransferase activity | 0.075  | 0.8     | 0.0069              |
| GO:0019843 | rRNA binding                                                                    | 0.079  | 0.82    | 0.0078              |
| GO:0005576 | extracellular region                                                            | 0.083  | 0.85    | 0.01                |
| GO:0006099 | tricarboxylic acid cycle                                                        | 0.088  | 0.89    | 0.012               |
| GO:0004775 | succinate-CoA ligase (ADP-forming) activity                                     | 0.11   | 0.95    | 0.013               |
| GO:0043022 | ribosome binding                                                                | 0.11   | 0.95    | 0.013               |

\* Fisher's exact test performed in Blast2GO; Most specific terms

**Table S21 Comparison of CBM-containing protein families in *P. tritici-repentis* and other grass and non-grass plant pathogens**

| Species                                                           | CBM family |   |    |    |    |    |    |    |    |    |    |    |    |    |    | Total |            |
|-------------------------------------------------------------------|------------|---|----|----|----|----|----|----|----|----|----|----|----|----|----|-------|------------|
|                                                                   | 1          | 6 | 12 | 13 | 18 | 20 | 21 | 24 | 32 | 35 | 38 | 42 | 43 | 48 | 50 |       | 52         |
| <i>Magnaporthe grisea</i> 70-15                                   | 22         | 2 | 0  | 0  | 33 | 3  | 1  | 0  | 0  | 3  | 0  | 1  | 1  | 1  | 21 | 1     | <b>89</b>  |
| <i>Pyrenophora tritici-repentis</i> Pt-1C-BFP                     | 11         | 1 | 0  | 0  | 19 | 2  | 1  | 0  | 1  | 3  | 0  | 1  | 2  | 3  | 0  | 0     | <b>44</b>  |
| <i>Phaeosphaeria nodorum</i> SN15 *                               | 13         | 1 | 0  | 0  | 43 | 3  | 1  | 0  | 1  | 3  | 0  | 1  | 2  | 2  | 0  | 0     | <b>70</b>  |
| <i>Gibberella zeae</i> PH-1 ( <i>F. graminearum</i> )             | 12         | 1 | 0  | 2  | 35 | 2  | 2  | 1  | 4  | 2  | 0  | 1  | 1  | 1  | 33 | 0     | <b>97</b>  |
| <i>Gibberella moniliformis</i> 7600 ( <i>F. verticillioides</i> ) | 14         | 1 | 0  | 1  | 26 | 2  | 1  | 1  | 3  | 4  | 1  | 1  | 1  | 3  | 52 | 0     | <b>111</b> |
| <i>Fusarium oxysporum</i> f. sp. <i>lycopersici</i> 4286          | 13         | 1 | 4  | 1  | 36 | 2  | 10 | 2  | 3  | 4  | 3  | 1  | 0  | 1  | 46 | 0     | <b>127</b> |
| <i>Verticillium albo-atrum</i> VaMs.102                           | 26         | 0 | 0  | 0  | 29 | 4  | 1  | 3  | 0  | 3  | 1  | 2  | 1  | 1  | 33 | 0     | <b>104</b> |
| <i>Verticillium dahliae</i> VdLs.17                               | 30         | 0 | 0  | 0  | 29 | 4  | 0  | 3  | 0  | 3  | 1  | 2  | 1  | 1  | 32 | 0     | <b>106</b> |

\* Data from Anselem et al. 2011
