# Supplementary material for: Comparative Genomics of a Plant-Pathogenic Fungus,Pyrenophora tritici-repentis, Reveals Transduplication and the Impact of Repeat Elements on Pathogenicity and Population Divergence
Source: Oxford University Press journal article supplement (doi:10.1534/g3.112.004044), 2013-01-01
Supplement: 41_figures3.pdf [file 41_figures3.pdf]

PTRG\_03457 CGTCATGCAGTCCGTGCGCTGCTGCCTTTACTAGTGCAGAAATCGGGAAATGCCGTGCGCCAAACTTTCCAGCTACCTAACTCTTTCAGCCTACTACTT  
 DW7\_94 CGTCATGCAGTCCGTGCGCTGCTGCCTTTACTAGTGCAGAAATCGGGAAATGCCGTGCGCCAAACTTTCCAGCTACCTAACTCTTTCAGCCTACTACTT  
 DW7\_14025 CGTTATGCAGTCCGTGCGCTGCTGCCTTTACTAGTGCAGAAATCGGGAAATGCCGTGCGCCAAACTTTCCAGCTACCTAACTCTTTCAGCCTACTACTT  
 PTRG\_00559 AGCTACCTAACTCTTTCAGCCTACTACTT  
 SD20\_20175 CTTTCAGCCTACTACTT

DW7\_94 TCTTAATTGTCGACCACATTTATCACAGTAATTAATCACATACGTGCGCTACGTTCAATCATCTACTCTACTACGCAATGGCAAGGACAAAACACGGCCT  
 DW7\_14025 TCTTAATTGTCGACCACATTTATCACAGTAATTAATCACATACGTGCGCTACGTTCAATCATCTACTCTACTACGCAATGGCAAGGACAAAACACGGCCT  
 PTRG\_00559 TCTTAATTGTCGACCACATTTATCACAGTAATTAATCACATACGTGCGCTACGTTCAATCATCTACTCTACTACGCAATGGCAAGGACAAAACACGGCCT  
 SD20\_20175 TCTTAATTGTCGACCACATTTATCACAGTAATTAATCACATACGTGCGCTACGTTCAATCATCTACTCTACTACGCAATGGCAAGGACAAAACACGGCCT  
 PTRG\_03457 TCTTAATTGTCGACCACATTTATCACAGTAATTAATCACATACGTGCGCTACGTTCAATCATCTACTCTACTACGCAATGGCAAGGACAAAACACGGCCT

DW\_94 AAGGTCACCGGTAAGCCG  
 DW\_14025 AAGGTCACCGGTAAGCCG  
 PTRG\_00559 AAGGTCACCGGTAAGCCGCGGGTGGTCTGATGGCAAGACAGTTACTGGCGGCAAGCCGGCTCAGAAGGCCCTTGTAGTAAGGCTAGACGTCGAAG  
 SD20\_20175 AAGGTCACCGGTAAGCCGCGGGTGGTCTGATGGCAAGACAGTTACTGGCGGCAAGCCGGCTCAGAAGGCCCTTGTAGTAAGGCTAGACGTCGAAG  
 PTRG\_03457 AAGGTCACCGGTAAGCCGCGGGTGGTCTGATGGCAAGACAGTTACTGGCGGCAAGCCGGCTCAGAAGGCCCTTGTAGTAAGGCTAGACGTCGAAG

PTRG\_00559 TAGCAGGAAAGTCTACGCGAAAGGCACCTGTAGCTGTTAAGAAGAAGCGCAAGTTAAGGCCGGCAgtaggttatacacagt~~g~~tttatacacagctat~~ttt~~  
 SD20\_20175 TAGCAGGAAAGTCTACGCGAAAGGCACCTGTAGCTGTTAAGAAGAAGCGCAAGTTAAGGCCGGCAgtaggttatacacagt~~g~~tttatacacagctat~~ttt~~  
 DW7\_11351 AAGAAGCGCAAGTTAAGGCCGGCAgtaggttatacacagt~~g~~tttatacacagctat~~ttt~~  
 PTRG\_03457 TAGCAGGAAAGTCTACGCGAAAGGCACCTGTAGCTGTTAAGAAGAAGCGCAAGTTAAGGCCGGCAgtaggttatacacagt~~g~~tttatacacagctat~~ttt~~

PTRG\_00559 ctaatttagcttagCTGTGCGATTACGGGAAATCAAGAGATACCAGAGAGGTTTTGAACACTCTTGCAGAAACTCCCCCTTTCCCGGTAGTGCAGGAA  
 SD20\_20175 ctaatttagcttagCTGTGCGATTACGGGAAATCAAGAGATACCAGAGAGGTTTTGAACACTCTTGCAGAAACTCCCCCTTTCCCGGTAGTGCAGGAA  
 DW7\_11351 ctaatttagcttagCTGTGCGATTACTCAAAATTAAGAGATACCAGAGAGGTTTTGAACACTCTTGCAGAAACTCCCCCTTTCCCGGTAGTGCAGGAA  
 PTRG\_03457 ctaatttagcttagCTGTGCGATTACGGGAAATCAAGAGATACCAGAGAGGTTTTGAACACTCTTGCAGAAACTCCCCCTTTCCCGGTAGTGCAGGAA

PTRG\_00559 TTTGCACAGGTGCACAAGGCCGATATCCGCTTTCAACGATCTGCAATCGAAGCTCTTCAGGAAGCTACAGAAGCTTTCTTAGTTGGTTATTTTgagggta  
 SD20\_20175 TTTGCACAGGTGCACAAGGCCGATATCCGCTTTCAACGATCTGCAATCGAAGCTCTTCAGGAAGCTACAGAAGCTTTCTTAGTTACTTATTTTgagggta  
 DW7\_11351 TTTGCACAGGTGCACAAGGCCGATATCCGCTTTCAACGATCTGCAATCGAAGCTCTTCAGGAAGCTACAGAAGCTTTCTTAGTTACTTATTTTgagggta  
 PTRG\_03457 TT-GCACAGGTGCACAAGGCCGATATCCGCTTTCAACGATCTGCAATCGAAGCTCTTCAGGAAGCTACAGAAGCTTTCTTAGTTGGTTATTTTgagggta

PTRG\_00559 tagtctatctaccctatactat~~ttt~~ttcatttaataaactttttagACTGCAACATCAATGCTATTTCAGCAGAAAGGGTTACTATTCAAGAGAAGGATT  
 SD20\_20175 taatctatctaccctatactat~~ttt~~ttcatttaataaactttttagACTGCAACATCAATGCTATTTCAGCAGAAAGGGTTACTATTCAAGAGAAGGATT  
 DW7\_11351 tagtctatctatccctatactat~~ttt~~ttcatttaataaactttttagACTGCAACATCAATGCTATTTCAGCAGAAAGGGTTACTATTCAAGAGAAGGATT  
 PTRG\_03457 tagtctatctaccctatactat~~ttt~~ttcatttaataaactttttagACTGCAACATCAATGCTATTTCAGCAGAAAGGGTTACTATTCAAGAGAAGGATT

PTRG\_00559 TCAATTGGCTAGGCGCTACTTTGGCGCGGAGTTACTAGCTTTTCTCTAGATTATAAGATATATCTAGATACACGTGCTTAAATGCTAGCTGGCGAAGCCT  
 SD20\_20175 TCAATTGGCTAGGCGCTACTTTGGCGCGGAGTTACTAGCTTTTCTCTAGATTATAAGATATATCTAGATACACGTGCTTAAATGCTAGCTGGCGAAGCCT  
 DW7\_11351 TCAATTAGCTAGGCGCTACTTTGGCGCGGAGTTACTAGCTTTTCTCTAGATTATAAGATATATCTAGATACACGTGCTTAAATGCTAGCTGGCGAAGCCT  
 PTRG\_03457 TCAATTGGCTAGGCGCTACTTTGGCGCGGAGTTACTAGCTTTTCTCTAGATTATAAGATATATCTAGATACACGTGCTTAAATGCTAGCTGGCGAAGCCT

PTRG\_00559 CTGTATATTATAAATGAAACTAGTTAATGCTACACTG  
 SD20\_20175 CTGTATATTATAAATGAAACTAGTTAATGCTACACTGTTAATGCTACTG  
 DW7\_11351 CTGTATAGTATAAATGAAACTAGTTAATGCTACACTGTAATAATCTACTGTGATACTATATAAACTTTTCTTTTATTGAAATCTATATTATATCTTGC  
 PTRG\_03457 CTGTATATTATAAATGAAACTAGTTAATGCTACACTG

**Figure S3** Alignment of novel H3-like (H3L) genes identified in three different *Ptr* isolates (PTRG numbers refer to genes identified in the reference genome of BFP-ToxAC, while DW7 and SD20 refer to the pathogenic DW7-ToxB and non-pathogenic SD20-NP strains, respectively). In all cases, contigs assembled *de novo* from Illumina reads suggest that copies of H3L genes in both DW7-ToxB and SD20-NP are inactive (note the many point mutations when compared to the PTRG sequences). DW7\_14025 and SD20\_20175 in particular lack a proper start codon (ATG to ATA change, underlined), while DW7\_11351 contains several in-frame nonsense codons in addition to the conserved stop codon (underlined).
