# Supplementary material for: Comparative Genomics of a Plant-Pathogenic Fungus,Pyrenophora tritici-repentis, Reveals Transduplication and the Impact of Repeat Elements on Pathogenicity and Population Divergence
Source: Oxford University Press journal article supplement (doi:10.1534/g3.112.004044), 2013-01-01
Supplement: 41_figures4.pdf [file 41_figures4.pdf]

## A

|              |     |                                                                |
|--------------|-----|----------------------------------------------------------------|
| Ptr H3       | 1   | MARTKQTARKSTGGKAPRKQLASKAARKSAPSTGGVKKPHRYKPGTVALREIRRYQKSTE   |
| Sn H3        | 1   | MARTKQTARKSTGGKAPRKQLASKAARKSAPSTGGVKKPHRYKPGTVALREIRRYQKSTE   |
| NcH3         | 1   | MARTKQTARKSTGGKAPRKQLASKAARKSAPSTGGVKKPHRYKPGTVALREIRRYQKSTE   |
| ScH3         | 1   | MARTKQTARKSTGGKAPRKQLASKAARKSAPSTGGVKKPHRYKPGTVALREIRRYQKSTE   |
| SpH3         | 1   | MARTKQTARKSTGGKAPRKQLASKAARKAAPATGGVKKPHRYRPGTVALREIRRYQKSTE   |
| HsH3.1       | 1   | MARTKQTARKSTGGKAPRKQLATKAARKSAPATGGVKKPHRYRPGTVALREIRRYQKSTE   |
| HsH3.3       | 1   | MARTKQTARKSTGGKAPRKQLATKAARKSAPSTGGVKKPHRYRPGTVALREIRRYQKSTE   |
|              |     |                                                                |
| SNOG_03319   | 61  | LLIRKLPFQRLVREIAQDFKSDLRFQSSAIGALQESVEAYLVSLFEDTNLCAIHAKRVTI   |
| PTRG_11558.1 | 61  | LLIRKLPFQRLVREIAQDFKSDLRFQSSAIGALQESVEAYLVSLFEDTNLCAIHAKRVTI   |
| NcH3         | 61  | LLIRKLPFQRLVREIAQDFKSDLRFQSSAIGLLQESVESYLVSLFEDTNLCAIHAKRVTI   |
| ScH3         | 61  | LLIRKLPFQRLVREIAQDFKTLDRFQSSAIGALQESVEAYLVSLFEDTNLAAIHAKRVTI   |
| SpH3         | 61  | LLIRKLPFQRLVREIAQDFKTLDRFQSSAIGALQEAVEAYLVSLFEDTNLCAIHGKRVTI   |
| HsH3.1       | 61  | LLIRKLPFQRLVREIAQDFKTLDRFQSSAVMALQEAACEAYLVGLFEDTNLCAIHAKRVTI  |
| HsH3.3       | 61  | LLIRKLPFQRLVREIAQDFKTLDRFQSSAAIGALQEAASEAYLVGLFEDTNLCAIHAKRVTI |
|              |     |                                                                |
| SNOG_03319   | 121 | QSKDIQLARRLRGERG                                               |
| PTRG_11558.1 | 121 | QSKDIQLARRLRGERG                                               |
| NcH3         | 121 | QSKDIQLARRLRGERN                                               |
| ScH3         | 121 | QKKDIKLARRLRGERS                                               |
| SpH3         | 121 | QPKDMQLARRLRGERS                                               |
| HsH3.1       | 121 | MPKDIQLARRIRGERA                                               |
| HsH3.3       | 121 | MPKDIQLARRIRGERA                                               |

## B

|            |     |                                                                |
|------------|-----|----------------------------------------------------------------|
| SNOG_15370 | 1   | MAPKTPDRRNKARPSRGGRAS-----TGSRRRESGKRVGQAGFAPDRAKKRYKPGTVAL    |
| PtrCenH3   | 1   | MAPKSPARRNKARPSRGGRVS-----VGSRKESGKRLGQPGFAPDRAKKRYKPGTVAL     |
| Sc_Cse4    | 1   | METEVP-----PVRTHSYA-----LDRYVRQKRREKQRKQSLKRVEKKYTPSELAL       |
| Nc_CenH3   | 1   | MPPKGGVTKSAVSKKAAAVPTPKATPPGRRKSRASSVQGDVFPQGGKRRYRPGTLAL      |
| Sp_Cnp1    | 1   | -----MAKKSLEMA-----EPGDFIPRPRKKRYRPGTTAL                       |
| MmCENpA    | 1   | MGPFR---KPQTPRRR-PS-S-----PAPGFSRQSSSVGSQTLRR-RQKFMWL          |
| HsCENpA    | 1   | MGPFRRRSRKPEAPRRRSPSP-----PTPGFSRRGPSLGASSHQHSRRRQGWL          |
|            |     |                                                                |
| SNOG_15370 | 54  | REIRRYQKSTDLLLRLTPFQRLVREIAQTVTT---ETGPTRWQSQAIQALQEAATEAFLVN  |
| PtrCenH3   | 54  | REIKRYQKTTDLLLKLFPFQRLVREIAQSVTT---EDGPNRWQSQAIMALQEAATEAFLVN  |
| Sc_Cse4    | 48  | YEIRKYQRSTDLLISKIPFARLVREIKVTFEFT---KDQDLRWQSMAIMALQEAASEAYLVG |
| Nc_CenH3   | 61  | KEIRNYQRTTDLVAKLPPFARLVREIAMQFRP---MDEEMRWQSQAILALQEAEEAFLVH   |
| Sp_Cnp1    | 30  | REIRKYQRSTDLIIQRLPFSRIVREISSEFVANFSTDVGLRWQSTALQCLQEAEEAFLVH   |
| MmCENpA    | 43  | KEIKTLQKSTDLFRKKPFSMVREICEKFSR---GVDFNWQAQALLALQEAEEAFLIH      |
| HsCENpA    | 49  | KEIRKLQKSTHLLIRKLPFSRLAREICVKFTR---GVDFNWQAQALLALQEAEEAFLVH    |
|            |     |                                                                |
| SNOG_15370 | 111 | LFHDANLCAIHAKRVTIQKDIQLARRLRAANGAPV--                          |
| PtrCenH3   | 111 | LFHDANLCAIHAKRVTIQKDIQLARRLRAANGAPV--                          |
| Sc_Cse4    | 105 | LEHTNLLALHAKRITIMKKDMQLARRIRGQFI----                           |
| Nc_CenH3   | 118 | LFEDTNLCAIHAKRVTIMQKDIQLARRIRGVWGAGWV                          |
| Sp_Cnp1    | 90  | LFEDTNLCAIHAKRVTIMQDMQLARRIRGA-----                            |
| MmCENpA    | 99  | LFEDAYLLSLHAGRVTLFPPKDIQLTRRIRGFEGGLP--                        |
| HsCENpA    | 105 | LFEDAYLLTLHAGRVTLFPPKDVQLARRIRGLEEGLG--                        |

**Figure S4** Alignment of *bona fide* histone H3 proteins from *Ptr* with those of other fungi reveal the expected level of conservation. (A) Histone H3 is extremely well conserved among *Ptr*, *S. nodorum* (Sn), *N. crassa* (Nc), *Schizosaccharomyces pombe* (Sp), *Saccharomyces cerevisiae* (Sc) and strongly resembles the replication-dependent H3.1 or replication-independent H3.3 from human (Hs). This is in stark contrast to alignments with the novel family of H3L proteins identified in *Ptr* (see Figure 3B). (B) Centromere-specific variants of H3, called CenH3 or CenpA, have variable N-terminal regions and more conserved histone-fold and C-terminal domains. While this variability suggested that H3Ls may be similar to CenH3 proteins, alignments of the histone-fold domain suggest that H3Ls are derived from canonical H3s (see Figure 3B). In both figures, completely conserved residues are shown in black, similar residues are in green and variable residues are in red.
