# Supplementary material for: Comparative Genomics of a Plant-Pathogenic Fungus,Pyrenophora tritici-repentis, Reveals Transduplication and the Impact of Repeat Elements on Pathogenicity and Population Divergence
Source: Oxford University Press journal article supplement (doi:10.1534/g3.112.004044), 2013-01-01
Supplement: 41_figures6.pdf [file 41_figures6.pdf]

### A. Putative Histone deacetylase inhibitor cluster in *P. tritici-repentis*

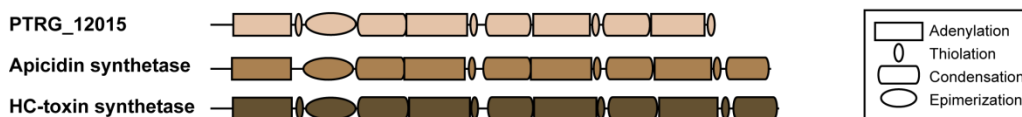

### B. Tox2-like cluster of *P. tritici-repentis*

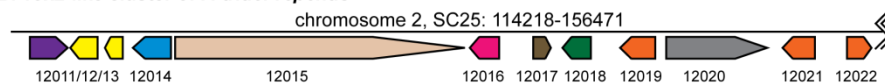

| <i>P. tritici-repentis</i> |                                           | Best BlastP hit  |                      |                                           |         |
|----------------------------|-------------------------------------------|------------------|----------------------|-------------------------------------------|---------|
| Locus                      | Proposed function                         | Accession Number | Organism             | Annotation                                | e value |
| 12011                      | FAD-linked oxidoreductase                 | ACZ66255.1       | <i>F. incarnatum</i> | APS9                                      | 9e-160  |
|                            |                                           | XP_001209092.1   | <i>A. terreus</i>    | conserved hypothetical                    | 4e-104  |
| 12012                      | Short chain dehydrogenase                 | XP_965074.1      | <i>N. crassa</i>     | conserved hypothetical                    | 8e-80   |
|                            |                                           | XP_001239054.1   | <i>C. immitis</i>    | conserved hypothetical                    | 1e-77   |
| 12013                      | Short chain dehydrogenase                 | XP_001820062.1   | <i>A. oryzae</i>     | hypothetical protein                      | 3e-68   |
|                            |                                           | XP_002374381.1   | <i>A. flavus</i>     | short chain type dehydrogenase, putative  | 9e-68   |
| 12014                      | MFS transporter                           | ACZ66257.1       | <i>F. incarnatum</i> | APS11                                     | 1e-123  |
|                            |                                           | sp:Q00357        | <i>C. carbonum</i>   | HC-toxin efflux carrier                   | 2e-102  |
| 12015                      | NRPS                                      | ACZ66258.1       | <i>F. incarnatum</i> | APS1                                      | 0.0     |
|                            |                                           | sp:Q01886.2      | <i>C. carbonum</i>   | HC-toxin synthetase                       | 0.0     |
| 12016                      | Basic leucine zipper transcription factor | ACZ66248.1       | <i>F. incarnatum</i> | APS2                                      | 2e-26   |
|                            |                                           | sp:O74205        | <i>C. carbonum</i>   | Transcription factor ToxE                 | 2e-16   |
| 12017                      | Thioesterase                              | XP_001799397.1   | <i>S. nodorum</i>    | hypothetical protein SNOG_09095           | 2e-24   |
|                            |                                           | XP_002378766.1   | <i>A. flavus</i>     | hypothetical protein                      | 1e-23   |
| 12018                      | Aminotransferase                          | sp:Q9Y885.1      | <i>C. carbonum</i>   | Aminotransferase ToxF                     | 9e-123  |
|                            |                                           | ACZ66250.1       | <i>F. incarnatum</i> | APS4                                      | 6e-105  |
| 12019                      | cytochrome P450                           | XP_001555869.1   | <i>B. fuckeliana</i> | hypothetical protein                      | 4e-105  |
|                            |                                           | XP_001795303     | <i>S. nodorum</i>    | hypothetical protein                      | 1e-96   |
| 12020                      | Fatty acid synthase                       | ACZ66251.1       | <i>F. incarnatum</i> | APS5                                      | 0.0     |
|                            |                                           | XP_002146311.1   | <i>P. marneffeii</i> | 3-oxoacyl-[acyl-carrier-protein] synthase | 0.0     |
| 12021                      | cytochrome P450                           | XP_001275091.1   | <i>A. clavatus</i>   | benzoate 4-monooxygenase, cytochrome P450 | 3e-134  |
|                            |                                           | ACZ66253.1       | <i>F. incarnatum</i> | APS7                                      | 8e-125  |
| 12022                      | cytochrome P450                           | ACZ66254.1       | <i>F. incarnatum</i> | APS8                                      | 2e-109  |
|                            |                                           | XP_002477830.1   | <i>T. stipitatus</i> | cytochrome P450, putative                 | 2e-76   |

**Figure S6** Modular architecture and biosynthetic cluster of a putative histone deacetylase inhibitor biosynthetic cluster in *P. tritici-repentis*. (A) Modular architecture of PTRG\_12015, APS1 (Apicidin synthetase) and HTS1 (HC-toxin synthetase). Domains (Adenylation, Thiolation, Condensation, and Epimerization) and spacing are to scale. (B) Putative biosynthetic cluster containing PTRG\_12015. Putative open reading frames are designated as arrows. Proteins with similar function are coded with a similar color. Blastp search was performed against the NCBI nr database. Proposed function as determined by KOG or GO classification.
