# Supplementary material for: Comparative Genomics of a Plant-Pathogenic Fungus,Pyrenophora tritici-repentis, Reveals Transduplication and the Impact of Repeat Elements on Pathogenicity and Population Divergence
Source: Oxford University Press journal article supplement (doi:10.1534/g3.112.004044), 2013-01-01
Supplement: 41_figures7.pdf [file 41_figures7.pdf]

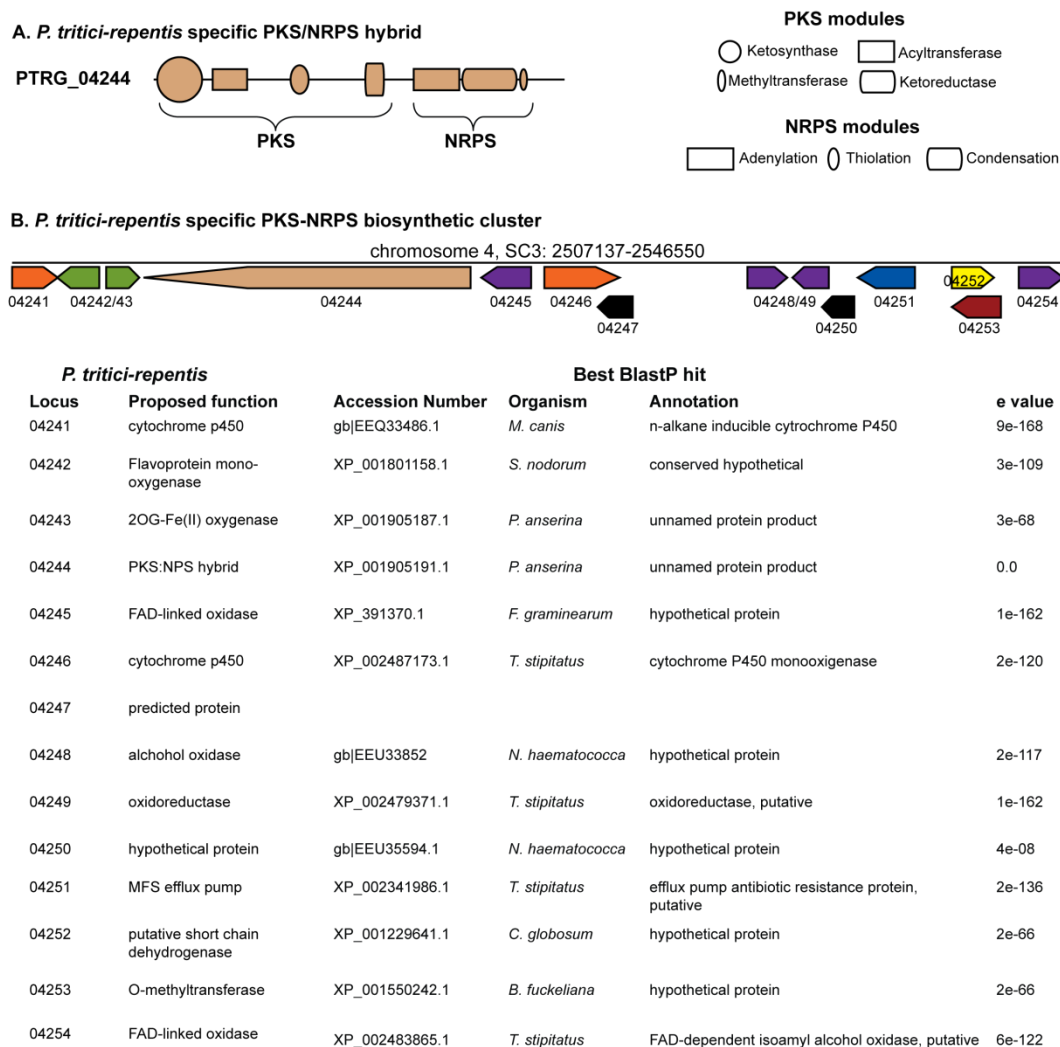

**Figure S7** Modular architecture and biosynthetic cluster of a *P. tritici-repentis*-specific PKS/NRPS hybrid. (A) Modular architecture of PTRG\_04244. Domains and spacing are to scale. (B) Putative biosynthetic cluster containing PTRG\_04244. Putative proteins are designated as arrows. Proteins with similar function are coded with a similar color. Blastp search against GenBank nr database. Proposed function as determined by KOG or GO classification.
