# Supplementary material for: Comparative Genomics of a Plant-Pathogenic Fungus,Pyrenophora tritici-repentis, Reveals Transduplication and the Impact of Repeat Elements on Pathogenicity and Population Divergence
Source: Oxford University Press journal article supplement (doi:10.1534/g3.112.004044), 2013-01-01
Supplement: 41_tables1.pdf [file 41_tables1.pdf]

**Table S1** *P. tritici-repentis* isolates used in this study

| Isolate name | Race | Geographic location | Path/non-path | Analyses                 |
|--------------|------|---------------------|---------------|--------------------------|
| BFP-ToxA/C   | 1    | S. Dakota, USA      | Path          | Reference Genome/EST/PCR |
| ASC1         | 1    | Manitoba, Canada    | Path          | PCR                      |
| 86-124       | 2    | Manitoba, Canada    | Path          | PCR                      |
| D308         | 3    | Manitoba, Canada    | Path          | PCR                      |
| DW2          | 5    | N. Dakota, USA      | Path          | PCR                      |
| DW7          | 5    | N. Dakota, USA      | Path          | Resequencing             |
| SO3          | ?    | Oregon, USA         | Path          | EST/PCR                  |
| SD20-NP      | 4    | S. Dakota, USA      | Non-path      | Resequencing/EST/PCR     |
| 90-2         | 4    | Manitoba, Canada    | Non-path      | PCR                      |
| 98-31-2      | 4    | N. Dakota, USA      | Non-path      | PCR                      |
