# Supplementary material for: Comparative Genomics of a Plant-Pathogenic Fungus,Pyrenophora tritici-repentis, Reveals Transduplication and the Impact of Repeat Elements on Pathogenicity and Population Divergence
Source: Oxford University Press journal article supplement (doi:10.1534/g3.112.004044), 2013-01-01
Supplement: 41_tables2.pdf [file 41_tables2.pdf]

**Table S2** *P. tritici-repentis* reference genome libraries sequenced

---

| Library      | Reads          | Physical Coverage (Fold) | Sequence Coverage * (Fold) |
|--------------|----------------|--------------------------|----------------------------|
| 4kb Plasmid  | 266,377        | 14                       | 4.73                       |
| 10kb Plasmid | 56,616         | 9                        | 1.11                       |
| 40kb Fosmid  | 64,483         | 35                       | 1.09                       |
| <b>Total</b> | <b>387,476</b> | <b>58</b>                | <b>6.93</b>                |

---

\* Q20 base coverage
