# Supplementary material for: Comparative Genomics of a Plant-Pathogenic Fungus,Pyrenophora tritici-repentis, Reveals Transduplication and the Impact of Repeat Elements on Pathogenicity and Population Divergence
Source: Oxford University Press journal article supplement (doi:10.1534/g3.112.004044), 2013-01-01
Supplement: 41_tables3.pdf [file 41_tables3.pdf]

**Table S3** *P. tritici-repentis* assembly anchored to the optical maps

| Optical Linkage group | Estimated Size (Mb) | Mapped Scaffolds | Scaffold Size (Mb) |
|-----------------------|---------------------|------------------|--------------------|
| chr1                  | 10.166              | 10, 33, 18,1,17  | 9.504              |
| chr2                  | 5.206               | 16,2,25,23       | 4.322              |
| chr3                  | 3.708               | 12,14,13         | 3.361              |
| chr4                  | 3.301               | 3                | 3.079              |
| chr5                  | 3.151               | 5                | 2.677              |
| chr6                  | 2.951               | 4                | 2.787              |
| chr7                  | 2.753               | 30,15,11         | 2.612              |
| chr8                  | 2.391               | 8,24,26          | 2.115              |
| chr9                  | 2.287               | 9,22,27          | 2.026              |
| chr10                 | 2.204               | 6                | 1.985              |
| chr11                 | 2.113               | 7                | 1.888              |
| <b>Total</b>          | <b>40.231</b>       |                  | <b>36.355</b>      |
