# Supplementary material for: Comparative Genomics of a Plant-Pathogenic Fungus,Pyrenophora tritici-repentis, Reveals Transduplication and the Impact of Repeat Elements on Pathogenicity and Population Divergence
Source: Oxford University Press journal article supplement (doi:10.1534/g3.112.004044), 2013-01-01
Supplement: 41_tables4.pdf [file 41_tables4.pdf]

**Table S4** Illumina sequenced *P. tritici-repentis* isolate read alignment under different stringencies

|                             | All repeats/Best hit* |              | No repeats/Best hit* |       | No repeats/Unique hit** |       |
|-----------------------------|-----------------------|--------------|----------------------|-------|-------------------------|-------|
|                             | (Low Stringency)      |              | (Medium Stringency)  |       | (High Stringency)       |       |
|                             | DW7                   | SD20         | DW7                  | SD20  | DW7                     | SD20  |
| PE alignment (M)            | 75.59                 | 56.87        | 22.18                | 44.10 | 21.65                   | 36.40 |
| SE alignment (M)            | 5.80                  | 9.11         | 0.52                 | 3.43  | 0.41                    | 2.20  |
| Unmapped (M)                | 2.92                  | 17.26        | 6.72                 | 19.56 | 7.36                    | 28.49 |
| Paired read count (M)       | 14.71                 | 33.54        |                      |       |                         |       |
| <b>Total read count (M)</b> | <b>29.42</b>          | <b>67.09</b> |                      |       |                         |       |

\*Best hit = up to 4 mismatches; \*\*Unique = no mismatches; Mapping performed with SOAP2
