# Supplementary material for: Comparative Genomics of a Plant-Pathogenic Fungus,Pyrenophora tritici-repentis, Reveals Transduplication and the Impact of Repeat Elements on Pathogenicity and Population Divergence
Source: Oxford University Press journal article supplement (doi:10.1534/g3.112.004044), 2013-01-01
Supplement: 41_tables6.pdf [file 41_tables6.pdf]

**Table S6 EST libraries produced to facilitate gene calling**

| Libraries  | Pathogenicity | Conditions    | Reads  | Spans  | Average Sequence Identity % |
|------------|---------------|---------------|--------|--------|-----------------------------|
| Pt-1C(BFP) | Yes-Race 1    | In planta     | 10,083 | 3,088  |                             |
| Pt-1C(BFP) | Yes-Race 1    | Mixed culture | 10,444 | 12,198 |                             |
| SO3-P      | Yes-Race 9    | Mixed culture | 10,185 | 12,115 | 98.08                       |
| SD20-NP    | No-Race 4     | Mixed culture | 10,328 | 8,195  | 98.2                        |
