# Supplementary material for: Comparative Genomics of a Plant-Pathogenic Fungus,Pyrenophora tritici-repentis, Reveals Transduplication and the Impact of Repeat Elements on Pathogenicity and Population Divergence
Source: Oxford University Press journal article supplement (doi:10.1534/g3.112.004044), 2013-01-01
Supplement: 41_tables7.pdf [file 41_tables7.pdf]

**Table S7 Serine codon usage in *P. tritici-repentis***

| Ser codon    | % usage    | # of codons   |
|--------------|------------|---------------|
| AGC          | 19.4       | 118705        |
| AGT          | 12.4       | 76150         |
| TCA          | 18.4       | 112959        |
| TCC          | 16.4       | 100858        |
| TCG          | 16.8       | 103107        |
| TCT          | 16.6       | 101583        |
| <b>Total</b> | <b>100</b> | <b>613362</b> |
