# Supplementary material for: Comparative Genomics of a Plant-Pathogenic Fungus,Pyrenophora tritici-repentis, Reveals Transduplication and the Impact of Repeat Elements on Pathogenicity and Population Divergence
Source: Oxford University Press journal article supplement (doi:10.1534/g3.112.004044), 2013-01-01
Supplement: 41_tables8.pdf [file 41_tables8.pdf]

**Table S8 Top five repeat families shared between the *P. tritici-repentis* reference genome and resequenced pathogenic and non-pathogenic isolates**

|                            | Reference family | Repeat class            | Annotation*                                                             |
|----------------------------|------------------|-------------------------|-------------------------------------------------------------------------|
| Pathogenic<br>- DW7-ToxB   | 8                | DNA transposon          | <i>hAT</i> superfamily; similar to Tfo1 from <i>F. oxysporum</i>        |
|                            | 63               | DNA transposon          | <i>hAT</i> superfamily; similar to Restless                             |
|                            | 105              | DNA transposon          | <i>Tc1/Mariner</i> superfamily                                          |
|                            | 49               | DNA transposon          | <i>Tc1/Mariner</i> superfamily; similar to Molly from <i>S. nodorum</i> |
|                            | 619              | DNA transposon          | <i>hAT</i> superfamily; similar to Restless                             |
| Non-pathogenic-<br>SD20-NP | 26               | Non-LTR retrotransposon | similar to Tad1 of <i>Blumeria</i>                                      |
|                            | 27               | Non-LTR retrotransposon | similar to Tad1 of <i>Blumeria</i>                                      |
|                            | 238              | Non-LTR retrotransposon | similar to Tad1 of <i>Blumeria</i>                                      |
|                            | 116              | unknown                 |                                                                         |
|                            | 293              | unknown                 |                                                                         |

\*Repeat annotation performed in Censor
