# Supplementary material for: Comparative Genomics of a Plant-Pathogenic Fungus,Pyrenophora tritici-repentis, Reveals Transduplication and the Impact of Repeat Elements on Pathogenicity and Population Divergence
Source: Oxford University Press journal article supplement (doi:10.1534/g3.112.004044), 2013-01-01
Supplement: 41_tables9.pdf [file 41_tables9.pdf]

**Table S9 Count of identical 16-mers in 1X sampling of resequencing reads of DW7-ToxB and SD20-NP**

| Times present | DW7-ToxB |            | SD20-NP  |            |
|---------------|----------|------------|----------|------------|
|               | Count    | % of Total | Count    | % of Total |
| 1 to 10       | 21571304 | 88.03      | 22331413 | 94.66      |
| 11 to 20      | 1585463  | 6.47       | 534634   | 2.27       |
| 21 to 30      | 523010   | 2.13       | 309650   | 1.31       |
| 31 to 40      | 251216   | 1.03       | 250797   | 1.06       |
| 41 to 50      | 113859   | 0.46       | 102102   | 0.43       |
| 51 to 60      | 24937    | 0.10       | 41720    | 0.18       |
| 61 to 70      | 7766     | 0.03       | 9912     | 0.04       |
| 71 to 80      | 3857     | 0.02       | 3513     | 0.01       |
| 81 to 90      | 6792     | 0.03       | 1368     | 0.01       |
| 91 to 100     | 4498     | 0.02       | 382      | 0.00       |
| 101 to 110    | 2746     | 0.01       | 631      | 0.00       |
| 111 to 120    | 1566     | 0.01       | 737      | 0.00       |
| 121 to 130    | 2732     | 0.01       | 280      | 0.00       |
| 131 to 140    | 6719     | 0.03       | 0        | 0.00       |
| 141 to 150    | 11469    | 0.05       | 378      | 0.00       |
| 151 to 160    | 11769    | 0.05       | 2237     | 0.01       |
| 161 to 170    | 4064     | 0.02       | 900      | 0.00       |
| 171 to 180    | 4337     | 0.02       | 0        | 0.00       |
| 181 to 190    | 5051     | 0.02       | 0        | 0.00       |
| 191 to 200    | 4506     | 0.02       | 0        | 0.00       |
| 201 to 210    | 4314     | 0.02       | 0        | 0.00       |
| 211 to 220    | 3851     | 0.02       | 0        | 0.00       |
| 221 to 230    | 8033     | 0.03       | 0        | 0.00       |
| 231 to 240    | 12958    | 0.05       | 0        | 0.00       |
| 241 to 250    | 16405    | 0.07       | 0        | 0.00       |
| 251 to 260    | 11951    | 0.05       | 0        | 0.00       |
| 261 to 270    | 11559    | 0.05       | 0        | 0.00       |
| 271 to 280    | 9348     | 0.04       | 0        | 0.00       |
| 281 to 290    | 14204    | 0.06       | 0        | 0.00       |
| 291 to 300    | 18206    | 0.07       | 0        | 0.00       |
| 301 to 310    | 21485    | 0.09       | 0        | 0.00       |
| 311 to 320    | 36139    | 0.15       | 0        | 0.00       |
| 321 to 330    | 35316    | 0.14       | 0        | 0.00       |
| 331 to 340    | 38744    | 0.16       | 0        | 0.00       |
| 341 to 350    | 32057    | 0.13       | 0        | 0.00       |
| 351 to 360    | 23219    | 0.09       | 0        | 0.00       |
| 361 to 370    | 10710    | 0.04       | 0        | 0.00       |
| 371 to 380    | 10067    | 0.04       | 0        | 0.00       |

|              |                 |      |                 |      |
|--------------|-----------------|------|-----------------|------|
| 381 to 390   | 11319           | 0.05 | 0               | 0.00 |
| 391 to 400   | 10130           | 0.04 | 0               | 0.00 |
| 401 to 410   | 9831            | 0.04 | 0               | 0.00 |
| 411 to 417   | 6554            | 0.03 | 0               | 0.00 |
| <b>Total</b> | <b>24504061</b> |      | <b>23590654</b> |      |

---
