# Supplementary material for: Comparative Genomics of a Plant-Pathogenic Fungus,Pyrenophora tritici-repentis, Reveals Transduplication and the Impact of Repeat Elements on Pathogenicity and Population Divergence
Source: Oxford University Press journal article supplement (doi:10.1534/g3.112.004044), 2013-01-01
Supplement: 41_tables12.pdf [file 41_tables12.pdf]

**Table S12 Pfam domains in repeats\***

| PFAM description                                            | # in repeats |
|-------------------------------------------------------------|--------------|
| AMP-binding enzyme                                          | 6            |
| AT hook motif                                               | 26           |
| Bacterial regulatory helix-turn-helix proteins, AraC family | 2            |
| Bacterial regulatory proteins, lacI family                  | 2            |
| Bacterial SH3 domain                                        | 2            |
| Centromere binding protein B, DNA binding                   | 3            |
| 'chromo' (CHRromatin Organisation MODifier) domain          | 32           |
| Condensation domain                                         | 6            |
| Core histone H2A/H2B/H3/H4                                  | 33           |
| DDE superfamily endonuclease                                | 111          |
| hAT family dimerisation domain                              | 178          |
| helix-turn-helix, Psq domain                                | 72           |
| Integrase core domain                                       | 157          |
| LTXXQ motif                                                 | 14           |
| MORN repeat variant                                         | 5            |
| Motilin/ghrelin                                             | 7            |
| Opioid growth factor receptor repeat                        | 2            |
| Osmosensory transporter coiled coil                         | 23           |
| Phosphopantetheine attachment site                          | 8            |
| PPAK motif                                                  | 1            |
| Protein of unknown function (DUF1299)                       | 1            |
| Protein of unknown function (DUF1409)                       | 4            |
| Retrotransposon gag protein                                 | 4            |
| Reverse transcriptase (RNA-dependent DNA polymerase)        | 139          |
| RNase H                                                     | 33           |
| SAMP Motif                                                  | 1            |
| Transposase                                                 | 1            |
| Viral A-type inclusion protein repeat                       | 16           |
| WCCH motif                                                  | 19           |
| WD domain, G-beta repeat                                    | 1            |
| Zinc knuckle                                                | 28           |

\*Pfam domains predicted by Broad Institute and present in custom repeat library
