# Supplementary material for: Comparative Genomics of a Plant-Pathogenic Fungus,Pyrenophora tritici-repentis, Reveals Transduplication and the Impact of Repeat Elements on Pathogenicity and Population Divergence
Source: Oxford University Press journal article supplement (doi:10.1534/g3.112.004044), 2013-01-01
Supplement: 41_tables13.pdf [file 41_tables13.pdf]

**Table S13** *De novo* assembly of resequenced *P. tritici-repentis* isolates\*

|                          | DW7-ToxB | SD20-NP |
|--------------------------|----------|---------|
| k-mer                    | 41       | 41      |
| # contigs                | 21300    | 40383   |
| largest contig (nt)      | 225936   | 320323  |
| L50 (nt)                 | 39556    | 69524   |
| % contigs > 10 kb        | 85       | 88      |
| % nt in contigs > 500 nt | 98       | 98      |

\* Assembly performed in Velvet
