# Supplementary material for: Comparative Genomics of a Plant-Pathogenic Fungus,Pyrenophora tritici-repentis, Reveals Transduplication and the Impact of Repeat Elements on Pathogenicity and Population Divergence
Source: Oxford University Press journal article supplement (doi:10.1534/g3.112.004044), 2013-01-01
Supplement: 41_tables15.pdf [file 41_tables15.pdf]

**Table S15 Putative NRPS-containing clusters in the *P. tritici-repentis* reference genome**

| <i>P. tritici-repentis</i> locus | Size (aa) | Putative function                                    |
|----------------------------------|-----------|------------------------------------------------------|
| PTRG_04244                       |           |                                                      |
| PTRG_04241                       | 461       | p450                                                 |
| PTRG_04242                       | 410       | flavoprotein monooxygenase                           |
| PTRG_04243                       | 322       | 2OG-Fe(II) oxygenase                                 |
| PTRG_04244                       | 3850      | pks:nrps hybrid                                      |
| PTRG_04245                       | 558       | FAD-linked oxidase                                   |
| PTRG_04246                       | 491       | p450 monooxygenase                                   |
| PTRG_04247                       | 384       | predicted protein                                    |
| PTRG_04248                       | 452       | alcohol oxidase                                      |
| PTRG_04249                       | 407       | oxidoreductase                                       |
| PTRG_04250                       | 169       | hypothetical protein                                 |
| PTRG_04251                       | 557       | MFS efflux pump transporter                          |
| PTRG_04252                       | 297       | putative short chain dehydrogenase                   |
| PTRG_04253                       | 401       | O-methyltransferase                                  |
| PTRG_04254                       | 540       | FAD-linked oxidase                                   |
| PTRG_00447                       |           |                                                      |
| PTRG_00447                       | 1282      | nrps10                                               |
| PTRG_00448                       | 182       |                                                      |
| PTRG_00449                       | 199       |                                                      |
| PTRG_00450                       | 317       | cyclin d-interacting protein                         |
| PTRG_00451                       | 295       | TBP-binding protein, activator of basal transription |
| PTRG_00452                       | 363       | uncharacterized, conserved                           |
| PTRG_00453                       | 347       |                                                      |
| PTRG_00454                       | 421       | p450                                                 |
| PTRG_00455                       | 317       | ubiquitin ligase                                     |
| PTRG_00456                       | 296       | zinc finger protein                                  |
| PTRG_00457                       | 554       | AMP domain                                           |
| PTRG_01683                       |           |                                                      |
| PTRG_01677                       | 548       | oxidoreductase                                       |
| PTRG_01678                       | 603       | Long chain fatty acid acyl-CoA ligase                |
| PTRG_01679                       | 438       |                                                      |
| PTRG_01680                       | 423       | Flavin-containing monooxygenase                      |
| PTRG_01681                       | 1299      | ABC transporter                                      |
| PTRG_01682                       | 219       | N-acetyltransferase                                  |
| PTRG_01683                       | 1841      | nrps6                                                |
| PTRG_01684                       | 475       |                                                      |
| PTRG_01685                       | 360       | tyrosinase                                           |

|            |      |                                                      |
|------------|------|------------------------------------------------------|
| PTRG_01800 |      |                                                      |
| PTRG_01796 | 1270 | splicing coactivator                                 |
| PTRG_01797 | 539  | MFS                                                  |
| PTRG_01798 | 89   |                                                      |
| PTRG_01799 | 1489 | ABC transporter                                      |
| PTRG_01800 | 6909 | nrps4                                                |
| PTRG_01801 | 79   |                                                      |
| PTRG_01802 | 369  | Malic acid transporter                               |
| PTRG_01803 | 187  | secreted protein                                     |
| PTRG_01804 | 172  |                                                      |
| PTRG_01805 | 507  | p450                                                 |
| PTRG_01806 | 689  | F-box domain                                         |
| PTRG_01807 | 294  | cyclin-like F-box domain                             |
| PTRG_08276 |      |                                                      |
| PTRG_08272 | 858  | translation initiation factor                        |
| PTRG_08273 | 906  | YAKI-serine threonine kinase                         |
| PTRG_08274 | 529  | Flavin-containing monooxygenase                      |
| PTRG_08275 | 1310 | ABC transporter                                      |
| PTRG_08276 | 5326 | nrps2                                                |
| PTRG_08280 | 402  | Lipid phosphatase, PAP2 family                       |
| PTRG_08281 | 161  | DNA-binding protein                                  |
| PTRG_08282 | 476  | mRNA splicing factor                                 |
| PTRG_08283 | 276  | transcription factor                                 |
| PTRG_08284 | 1049 | von Willebrands; may be two proteins or misannotated |
| PTRG_08285 | 743  | AAA+-type ATPase                                     |
| PTRG_08286 | 706  |                                                      |
| PTRG_08287 | 855  | RNA-binding protein                                  |
| PTRG_08288 | 445  | Hormone sensitive-lipase                             |
| PTRG_08289 | 165  |                                                      |
| PTRG_08290 | 144  | DNA methyltransferase                                |
| PTRG_08291 | 349  |                                                      |
| PTRG_09101 |      |                                                      |
| PTRG_09095 | 1432 | ABC transporter                                      |
| PTRG_09096 | 328  | RTA1-like protein                                    |
| PTRG_09097 | 391  | Aminotransferase, class IV                           |
| PTRG_09098 | 2054 | Fatty acid synthase, beta                            |
| PTRG_09099 | 1590 | Beta-ketoacyl synthase                               |
| PTRG_09100 | 537  | P450                                                 |
| PTRG_09101 | 6024 | nrps                                                 |
| PTRG_09102 | 446  | kynurenine 3-monooxygenase                           |

|            |      |                                           |
|------------|------|-------------------------------------------|
| PTRG_09103 | 552  | MFS                                       |
| PTRG_12015 |      |                                           |
| PTRG_12011 | 597  | FAD-linked oxidoreductase                 |
| PTRG_12012 | 305  | Short chain dehydrogenase                 |
| PTRG_12013 | 266  | Short chain dehydrogenase                 |
| PTRG_12014 | 564  | MFS transporter                           |
| PTRG_12015 | 4634 | nrps HDAC                                 |
| PTRG_12016 | 470  | Basic leucine zipper transcription factor |
| PTRG_12017 | 242  | Thioesterase                              |
| PTRG_12018 | 339  | Aminotransferase                          |
| PTRG_12019 | 532  | Cytochrome P450                           |
| PTRG_12020 | 1618 | Fatty acid synthase                       |
| PTRG_12021 | 437  | Cytochrome P450                           |
| PTRG_12022 | 338  | Cytochrome P450                           |

---
