# Supplementary material for: Comparative Genomics of a Plant-Pathogenic Fungus,Pyrenophora tritici-repentis, Reveals Transduplication and the Impact of Repeat Elements on Pathogenicity and Population Divergence
Source: Oxford University Press journal article supplement (doi:10.1534/g3.112.004044), 2013-01-01
Supplement: 41_tables17.pdf [file 41_tables17.pdf]

**Table S17 *Pyrenophora tritici-repentis*-specific secreted proteins as predicted in Blast2GO**

| Locus                             | Size (aa) | % Cys | HMM             | E-value        | Present DW7 | Present SD20 | EST           |              |               |               |
|-----------------------------------|-----------|-------|-----------------|----------------|-------------|--------------|---------------|--------------|---------------|---------------|
|                                   |           |       |                 |                |             |              | Race1 culture | Race1 Planta | Race4 culture | Race9 culture |
| Race 1 specific                   |           |       |                 |                |             |              |               |              |               |               |
| PTRG_05296                        | 118       | 0.85  |                 |                | no          | no           |               |              |               |               |
| PTRG_04919                        | 123       | 0.82  |                 |                | no          | no           |               |              |               |               |
| PTRG_10524                        | 59        | 6.9   |                 |                | no          | no           |               |              |               |               |
| Pathogen Specific                 |           |       |                 |                |             |              |               |              |               |               |
| PTRG_06853                        | 122       | 1.65  |                 |                | yes         | no           |               |              |               |               |
| PTRG_11888                        | 86        | 14.12 |                 |                | yes         | no           | 7             | 8            |               | 4             |
| PTRG_12138                        | 73        | 9.72  |                 |                | yes         | no           | 14            | 2            |               |               |
| Discontinuously distributed       |           |       |                 |                |             |              |               |              |               |               |
| PTRG_09431                        | 73        | 4.17  |                 |                | no          | yes          |               |              |               |               |
| Present in all sequenced isolates |           |       |                 |                |             |              |               |              |               |               |
| PTRG_00723                        | 184       | 0.55  |                 |                | yes         | yes          |               |              |               |               |
| PTRG_05020                        | 85        | 0     | GRP             | 0.0022         | yes         | yes          |               |              |               | 2             |
| PTRG_10257                        | 61        | 0     |                 |                | yes         | yes          | 2             |              | 14            | 7             |
| PTRG_00384                        | 63        | 1.61  |                 |                | yes         | yes          |               |              |               |               |
| PTRG_00529                        | 52        | 0     |                 |                | yes         | yes          |               |              |               |               |
| PTRG_00558                        | 80        | 10.13 |                 |                | yes         | yes          |               | 2            |               |               |
| PTRG_00758                        | 75        | 4.05  |                 |                | yes         | yes          |               |              |               |               |
| PTRG_00935                        | 54        | 9.43  |                 |                | yes         | yes          |               |              |               |               |
| PTRG_01132                        | 87        | 2.33  |                 |                | yes         | yes          |               |              |               |               |
| PTRG_01371                        | 54        | 11.32 |                 |                | yes         | yes          |               | 2            |               | 3             |
| PTRG_01382                        | 201       | 0     |                 |                | yes         | yes          |               |              |               |               |
| PTRG_01617                        | 59        | 0     |                 |                | yes         | yes          |               |              |               |               |
| PTRG_01675                        | 55        | 3.7   |                 |                | yes         | yes          |               |              |               |               |
| PTRG_01823                        | 133       | 6.06  |                 |                | yes         | yes          |               |              |               |               |
| PTRG_01890                        | 50        | 4.08  |                 |                | yes         | yes          |               |              |               |               |
| PTRG_01923                        | 78        | 7.79  |                 |                | yes         | yes          |               |              |               |               |
| PTRG_02034                        | 128       | 3.94  |                 |                | yes         | yes          |               |              |               |               |
| PTRG_02202                        | 90        | 2.25  |                 |                | yes         | yes          |               |              |               |               |
| PTRG_02218                        | 92        | 3.3   |                 |                | yes         | yes          |               |              |               |               |
| PTRG_02241                        | 99        | 6.12  |                 |                | yes         | yes          |               |              |               |               |
| PTRG_02456                        | 90        | 1.12  |                 |                | yes         | yes          |               |              |               |               |
| PTRG_02606                        | 91        | 5.56  | PRA1<br>Innexin | 0.098<br>0.036 | yes         | yes          |               |              |               |               |
| PTRG_02982                        | 76        | 10.67 |                 |                | yes         | yes          |               |              |               |               |
| PTRG_03151                        | 69        | 1.47  |                 |                | yes         | yes          |               |              |               |               |
| PTRG_03183                        | 50        | 4.08  |                 |                | yes         | yes          | 2             | 1            |               |               |

|            |     |      |               |        |     |     |   |   |
|------------|-----|------|---------------|--------|-----|-----|---|---|
| PTRG_03424 | 129 | 6.25 |               |        | yes | yes |   |   |
| PTRG_03447 | 65  | 0    |               |        | yes | yes |   |   |
| PTRG_03460 | 79  | 2.56 |               |        | yes | yes |   |   |
| PTRG_03545 | 92  | 6.59 |               |        | yes | yes |   |   |
| PTRG_03740 | 137 | 0.74 |               |        | yes | yes |   |   |
| PTRG_03833 | 155 | 6.49 |               |        | yes | yes |   |   |
| PTRG_03972 | 117 | 3.45 |               |        | yes | yes |   |   |
| PTRG_04061 | 95  | 7.45 |               |        | yes | yes |   |   |
| PTRG_04438 | 132 | 3.05 |               |        | yes | yes |   |   |
| PTRG_04467 | 75  | 1.35 |               |        | yes | yes |   |   |
| PTRG_04476 | 130 | 3.88 |               |        | yes | yes |   |   |
| PTRG_04489 | 137 | 3.68 |               |        | yes | yes |   |   |
| PTRG_04511 | 57  | 5.36 |               |        | yes | yes |   |   |
| PTRG_04567 | 113 | 6.25 | Peptidase_M19 | 0.076  | yes | yes | 2 | 2 |
|            |     |      | Meleagrin     | 0.089  |     |     |   |   |
| PTRG_04595 | 127 | 3.97 |               |        | yes | yes |   |   |
| PTRG_04645 | 109 | 3.7  |               |        | yes | yes |   |   |
| PTRG_04835 | 99  | 8.16 |               |        | yes | yes | 2 |   |
| PTRG_04870 | 73  | 9.72 |               |        | yes | yes |   |   |
| PTRG_05019 | 142 | 0    |               |        | yes | yes |   |   |
| PTRG_05021 | 143 | 1.41 |               |        | yes | yes |   |   |
| PTRG_05037 | 130 | 1.55 |               |        | yes | yes |   |   |
| PTRG_05069 | 95  | 6.38 |               |        | yes | yes |   |   |
| PTRG_05127 | 95  | 6.38 |               |        | yes | yes |   |   |
| PTRG_05187 | 141 | 0    |               |        | yes | yes | 8 | 2 |
| PTRG_05203 | 130 | 0.78 |               |        | yes | yes |   | 2 |
| PTRG_05392 | 96  | 3.16 |               |        | yes | yes |   |   |
| PTRG_05427 | 81  | 1.25 | DEC-1_N       | 0.0014 | yes | yes |   |   |
|            |     |      | PLRV_ORF5     | 0.048  |     |     |   |   |
| PTRG_05658 | 110 | 7.34 |               |        | yes | yes |   |   |
| PTRG_05788 | 395 | 0.51 |               |        | yes | yes |   | 2 |
| PTRG_05858 | 77  | 0    |               |        | yes | yes |   |   |
| PTRG_05999 | 77  | 2.63 |               |        | yes | yes |   |   |
| PTRG_06015 | 56  | 1.82 |               |        | yes | yes |   |   |
| PTRG_06042 | 119 | 3.39 |               |        | yes | yes |   |   |
| PTRG_06295 | 57  | 0    |               |        | yes | yes | 2 |   |
| PTRG_06429 | 140 | 6.47 |               |        | yes | yes | 2 |   |
| PTRG_06505 | 295 | 0    |               |        | yes | yes |   |   |
| PTRG_06517 | 104 | 7.77 |               |        | yes | yes |   |   |
| PTRG_06556 | 94  | 3.23 |               |        | yes | yes |   |   |
| PTRG_06557 | 52  | 1.96 |               |        | yes | yes |   | 2 |
| PTRG_06608 | 53  | 1.92 |               |        | yes | yes |   |   |
| PTRG_07001 | 69  | 8.82 |               |        | yes | yes |   |   |

|            |     |       |               |           |     |     |    |   |   |   |
|------------|-----|-------|---------------|-----------|-----|-----|----|---|---|---|
| PTRG_07260 | 292 | 3.78  |               |           | yes | yes |    |   |   |   |
| PTRG_07271 | 88  | 5.75  |               |           | yes | yes |    |   |   |   |
| PTRG_07510 | 74  | 1.37  |               |           | yes | yes |    |   |   |   |
| PTRG_07515 | 128 | 7.09  |               |           | yes | yes |    |   |   |   |
| PTRG_07580 | 168 | 0     | PIR           | 0.0000046 | yes | yes | 10 | 2 | 6 | 4 |
| PTRG_07935 | 80  | 1.27  | Peptidase_M66 | 0.0094    | yes | yes |    |   |   |   |
| PTRG_07936 | 164 | 3.68  |               |           | yes | yes |    |   |   |   |
| PTRG_08136 | 76  | 2.67  | Mfp-3         | 0.032     | yes | yes |    |   |   |   |
| PTRG_08379 | 69  | 2.94  |               |           | yes | yes | 8  |   | 2 |   |
| PTRG_08398 | 107 | 1.89  |               |           | yes | yes |    |   |   |   |
| PTRG_08448 | 130 | 3.1   |               |           | yes | yes |    |   |   |   |
| PTRG_08572 | 87  | 16.28 |               |           | yes | yes | 2  |   |   |   |
| PTRG_08636 | 60  | 0     |               |           | yes | yes |    |   |   |   |
| PTRG_09109 | 92  | 6.59  |               |           | yes | yes |    |   |   |   |
| PTRG_09139 | 105 | 3.85  |               |           | yes | yes | 6  |   |   |   |
| PTRG_09257 | 293 | 1.71  |               |           | yes | yes |    |   |   |   |
| PTRG_09351 | 77  | 10.53 |               |           | yes | yes |    |   |   | 2 |
| PTRG_09380 | 96  | 7.37  |               |           | yes | yes | 2  |   | 1 |   |
| PTRG_09458 | 49  | 4.17  |               |           | yes | yes | 2  |   |   |   |
| PTRG_09580 | 459 | 1.97  |               |           | yes | yes |    |   |   |   |
| PTRG_09958 | 97  | 6.25  |               |           | yes | yes |    |   |   |   |
| PTRG_10036 | 54  | 1.89  |               |           | yes | yes |    |   |   |   |
| PTRG_10069 | 70  | 4.35  |               |           | yes | yes |    |   |   |   |
| PTRG_10109 | 153 | 0.66  |               |           | yes | yes | 8  |   | 2 | 2 |
| PTRG_10127 | 119 | 2.54  |               |           | yes | yes | 2  |   |   | 4 |
| PTRG_10138 | 130 | 0     |               |           | yes | yes |    |   |   |   |
| PTRG_10852 | 61  | 5     |               |           | yes | yes |    |   |   |   |
| PTRG_10951 | 142 | 1.42  |               |           | yes | yes |    |   |   |   |
| PTRG_10990 | 123 | 3.28  |               |           | yes | yes |    |   |   |   |
| PTRG_11024 | 51  | 4     |               |           | yes | yes |    |   |   |   |
| PTRG_11036 | 135 | 4.48  |               |           | yes | yes |    |   |   |   |
| PTRG_11089 | 64  | 9.52  |               |           | yes | yes | 6  | 3 |   | 2 |
| PTRG_11261 | 70  | 5.8   |               |           | yes | yes |    |   |   |   |
| PTRG_11351 | 94  | 0     |               |           | yes | yes |    |   |   |   |
| PTRG_11361 | 122 | 4.96  |               |           | yes | yes |    |   |   |   |
| PTRG_11416 | 60  | 1.69  |               |           | yes | yes | 2  |   |   |   |
| PTRG_11417 | 65  | 4.69  | PsaX          | 0.05      | yes | yes |    |   |   |   |
