# Supplementary material for: Comparative Genomics of a Plant-Pathogenic Fungus,Pyrenophora tritici-repentis, Reveals Transduplication and the Impact of Repeat Elements on Pathogenicity and Population Divergence
Source: Oxford University Press journal article supplement (doi:10.1534/g3.112.004044), 2013-01-01
Supplement: 41_tables18.pdf [file 41_tables18.pdf]

**Table S18 Total numbers of predicted CAZymes in PTR and selected ascomycetes**

| Species                             | GH  | GT  | PL | CE | CBM | EXPN |
|-------------------------------------|-----|-----|----|----|-----|------|
| <i>Pyrenophora tritici-repentis</i> | 245 | 91  | 10 | 39 | 45  | 2    |
| <i>Mycosphaerella graminicola</i>   | 191 | 99  | 3  | 18 | 21  | 3    |
| <i>Trichoderma reesei</i>           | 192 | 93  | 6  | 17 | 48  | 4    |
| <i>Fusarium graminearum</i>         | 247 | 102 | 21 | 44 | 67  | 4    |
| <i>Neurospora crassa</i>            | 173 | 76  | 4  | 22 | 42  | 1    |
| <i>Magnaporthe grisea</i>           | 232 | 92  | 5  | 47 | 65  | 1    |
| <i>Aspergillus nidulans</i>         | 251 | 91  | 21 | 31 | 41  | 1    |
| <i>Stagonospora nodorum</i>         | 273 | 89  | 10 | 50 | 61  | 4    |

GH = glycoside hydrolases; GT = glycosyl transferases; PL = polysaccharide lyases; CE = carbohydrate esterases; CBM = carbohydrate binding modules; EXPN = distantly related to plant expansins. Predicted CAZymes were identified using the carbohydrate-active enzymes database tools
