# Supplementary material for: Comparative Genomics of a Plant-Pathogenic Fungus,Pyrenophora tritici-repentis, Reveals Transduplication and the Impact of Repeat Elements on Pathogenicity and Population Divergence
Source: Oxford University Press journal article supplement (doi:10.1534/g3.112.004044), 2013-01-01
Supplement: 41_tables19.pdf [file 41_tables19.pdf]

**Table S19 Comparison of pectinolytic enzymes in *P. tritici-repentis* vs. other grass and non-grass plant pathogens**

| Species                                                           | PL family |    |   |   |    |    |           | GH family |    |    |    |     | Total     |
|-------------------------------------------------------------------|-----------|----|---|---|----|----|-----------|-----------|----|----|----|-----|-----------|
|                                                                   | 1         | 3  | 4 | 9 | 11 | 20 | Total     | 28        | 78 | 88 | 95 | 105 |           |
| <i>Magnaporthe grisea</i> 70-15                                   | 2         | 1  | 1 | 0 | 0  | 1  | <b>5</b>  | 3         | 1  | 1  | 1  | 3   | <b>9</b>  |
| <i>Pyrenophora tritici-repentis</i> Pt-1C-BFP                     | 3         | 3  | 4 | 0 | 0  | 0  | <b>10</b> | 6         | 3  | 1  | 2  | 3   | <b>15</b> |
| <i>Phaeosphaeria nodorum</i> SN15*                                | 4         | 2  | 4 | 0 | 0  | 0  | <b>10</b> | 4         | 4  | 1  | 2  | 3   | <b>14</b> |
| <i>Gibberella zeae</i> PH-1 ( <i>F. graminearum</i> )             | 9         | 7  | 3 | 1 | 0  | 1  | <b>21</b> | 6         | 7  | 1  | 2  | 3   | <b>19</b> |
| <i>Gibberella moniliformis</i> 7600 ( <i>F. verticillioides</i> ) | 11        | 7  | 3 | 2 | 0  | 0  | <b>23</b> | 9         | 9  | 2  | 1  | 3   | <b>24</b> |
| <i>Fusarium oxysporum</i> f. sp. <i>lycopersici</i> 4286          | 11        | 7  | 3 | 2 | 1  | 0  | <b>24</b> | 15        | 14 | 3  | 2  | 5   | <b>39</b> |
| <i>Verticillium albo-atrum</i> VaMs.102                           | 16        | 11 | 4 | 2 | 1  | 0  | <b>34</b> | 12        | 9  | 4  | 2  | 3   | <b>30</b> |
| <i>Verticillium dahliae</i> VdLs.17                               | 17        | 11 | 4 | 2 | 1  | 0  | <b>35</b> | 12        | 9  | 4  | 2  | 4   | <b>31</b> |

\* Data from Amselem et al. 2011
