# Supplementary material for: Comparative Genomics of a Plant-Pathogenic Fungus,Pyrenophora tritici-repentis, Reveals Transduplication and the Impact of Repeat Elements on Pathogenicity and Population Divergence
Source: Oxford University Press journal article supplement (doi:10.1534/g3.112.004044), 2013-01-01
Supplement: 41_tables20.pdf [file 41_tables20.pdf]

**Table S20 GO enrichment analysis of ESTs present in the in planta library\***

| GO Term    | Name                                                                            | FDR    | FWER    | single test p-Value |
|------------|---------------------------------------------------------------------------------|--------|---------|---------------------|
| GO:0003735 | structural constituent of ribosome                                              | 2E-09  | 7.1E-09 | 7.9E-14             |
| GO:0046933 | hydrogen ion transporting ATP synthase activity, rotational mechanism           | 0.0003 | 0.002   | 0.000017            |
| GO:0008553 | hydrogen-exporting ATPase activity, phosphorylative mechanism                   | 0.0048 | 0.047   | 0.00033             |
| GO:0015935 | small ribosomal subunit                                                         | 0.0052 | 0.051   | 0.00037             |
| GO:0045263 | proton-transporting ATP synthase complex, coupling factor F(o)                  | 0.0088 | 0.092   | 0.00058             |
| GO:0043581 | mycelium development                                                            | 0.017  | 0.18    | 0.0013              |
| GO:0031176 | endo-1,4-beta-xylanase activity                                                 | 0.02   | 0.29    | 0.0021              |
| GO:0030245 | cellulose catabolic process                                                     | 0.02   | 0.29    | 0.0021              |
| GO:0008810 | cellulase activity                                                              | 0.043  | 0.54    | 0.0035              |
| GO:0004784 | superoxide dismutase activity                                                   | 0.043  | 0.54    | 0.0035              |
| GO:0006414 | translational elongation                                                        | 0.043  | 0.54    | 0.0035              |
| GO:0006801 | superoxide metabolic process                                                    | 0.053  | 0.65    | 0.0054              |
| GO:0009279 | cell outer membrane                                                             | 0.075  | 0.8     | 0.0069              |
| GO:0003871 | 5-methyltetrahydropteroyltriglutamate-homocysteine S-methyltransferase activity | 0.075  | 0.8     | 0.0069              |
| GO:0019843 | rRNA binding                                                                    | 0.079  | 0.82    | 0.0078              |
| GO:0005576 | extracellular region                                                            | 0.083  | 0.85    | 0.01                |
| GO:0006099 | tricarboxylic acid cycle                                                        | 0.088  | 0.89    | 0.012               |
| GO:0004775 | succinate-CoA ligase (ADP-forming) activity                                     | 0.11   | 0.95    | 0.013               |
| GO:0043022 | ribosome binding                                                                | 0.11   | 0.95    | 0.013               |

\* Fisher's exact test performed in Blast2GO; Most specific terms
