# Supplementary material for: Comparative Genomics of a Plant-Pathogenic Fungus,Pyrenophora tritici-repentis, Reveals Transduplication and the Impact of Repeat Elements on Pathogenicity and Population Divergence
Source: Oxford University Press journal article supplement (doi:10.1534/g3.112.004044), 2013-01-01
Supplement: 41_tables21.pdf [file 41_tables21.pdf]

**Table S21 Comparison of CBM-containing protein families in *P. tritici-repentis* and other grass and non-grass plant pathogens**

| Species                                                           | CBM family |   |    |    |    |    |    |    |    |    |    |    |    |    |    | Total |            |
|-------------------------------------------------------------------|------------|---|----|----|----|----|----|----|----|----|----|----|----|----|----|-------|------------|
|                                                                   | 1          | 6 | 12 | 13 | 18 | 20 | 21 | 24 | 32 | 35 | 38 | 42 | 43 | 48 | 50 |       | 52         |
| <i>Magnaporthe grisea</i> 70-15                                   | 22         | 2 | 0  | 0  | 33 | 3  | 1  | 0  | 0  | 3  | 0  | 1  | 1  | 1  | 21 | 1     | <b>89</b>  |
| <i>Pyrenophora tritici-repentis</i> Pt-1C-BFP                     | 11         | 1 | 0  | 0  | 19 | 2  | 1  | 0  | 1  | 3  | 0  | 1  | 2  | 3  | 0  | 0     | <b>44</b>  |
| <i>Phaeosphaeria nodorum</i> SN15 *                               | 13         | 1 | 0  | 0  | 43 | 3  | 1  | 0  | 1  | 3  | 0  | 1  | 2  | 2  | 0  | 0     | <b>70</b>  |
| <i>Gibberella zeae</i> PH-1 ( <i>F. graminearum</i> )             | 12         | 1 | 0  | 2  | 35 | 2  | 2  | 1  | 4  | 2  | 0  | 1  | 1  | 1  | 33 | 0     | <b>97</b>  |
| <i>Gibberella moniliformis</i> 7600 ( <i>F. verticillioides</i> ) | 14         | 1 | 0  | 1  | 26 | 2  | 1  | 1  | 3  | 4  | 1  | 1  | 1  | 3  | 52 | 0     | <b>111</b> |
| <i>Fusarium oxysporum</i> f. sp. <i>lycopersici</i> 4286          | 13         | 1 | 4  | 1  | 36 | 2  | 10 | 2  | 3  | 4  | 3  | 1  | 0  | 1  | 46 | 0     | <b>127</b> |
| <i>Verticillium albo-atrum</i> VaMs.102                           | 26         | 0 | 0  | 0  | 29 | 4  | 1  | 3  | 0  | 3  | 1  | 2  | 1  | 1  | 33 | 0     | <b>104</b> |
| <i>Verticillium dahliae</i> VdLs.17                               | 30         | 0 | 0  | 0  | 29 | 4  | 0  | 3  | 0  | 3  | 1  | 2  | 1  | 1  | 32 | 0     | <b>106</b> |

\* Data from Anselem et al. 2011
