# Supplementary material for: Comparative Genomics of a Plant-Pathogenic Fungus, Pyrenophora tritici-repentis, Reveals Transduplication and the Impact of Repeat Elements on Pathogenicity and Population Divergence
Source: PubMed Central journal article supplement (PMC3538342; doi:10.1534/g3.112.004044), 2013-01-01
Supplement: supp_3.1.41_FigureS1.pdf [file supp_3.1.41_FigureS1.pdf]

A

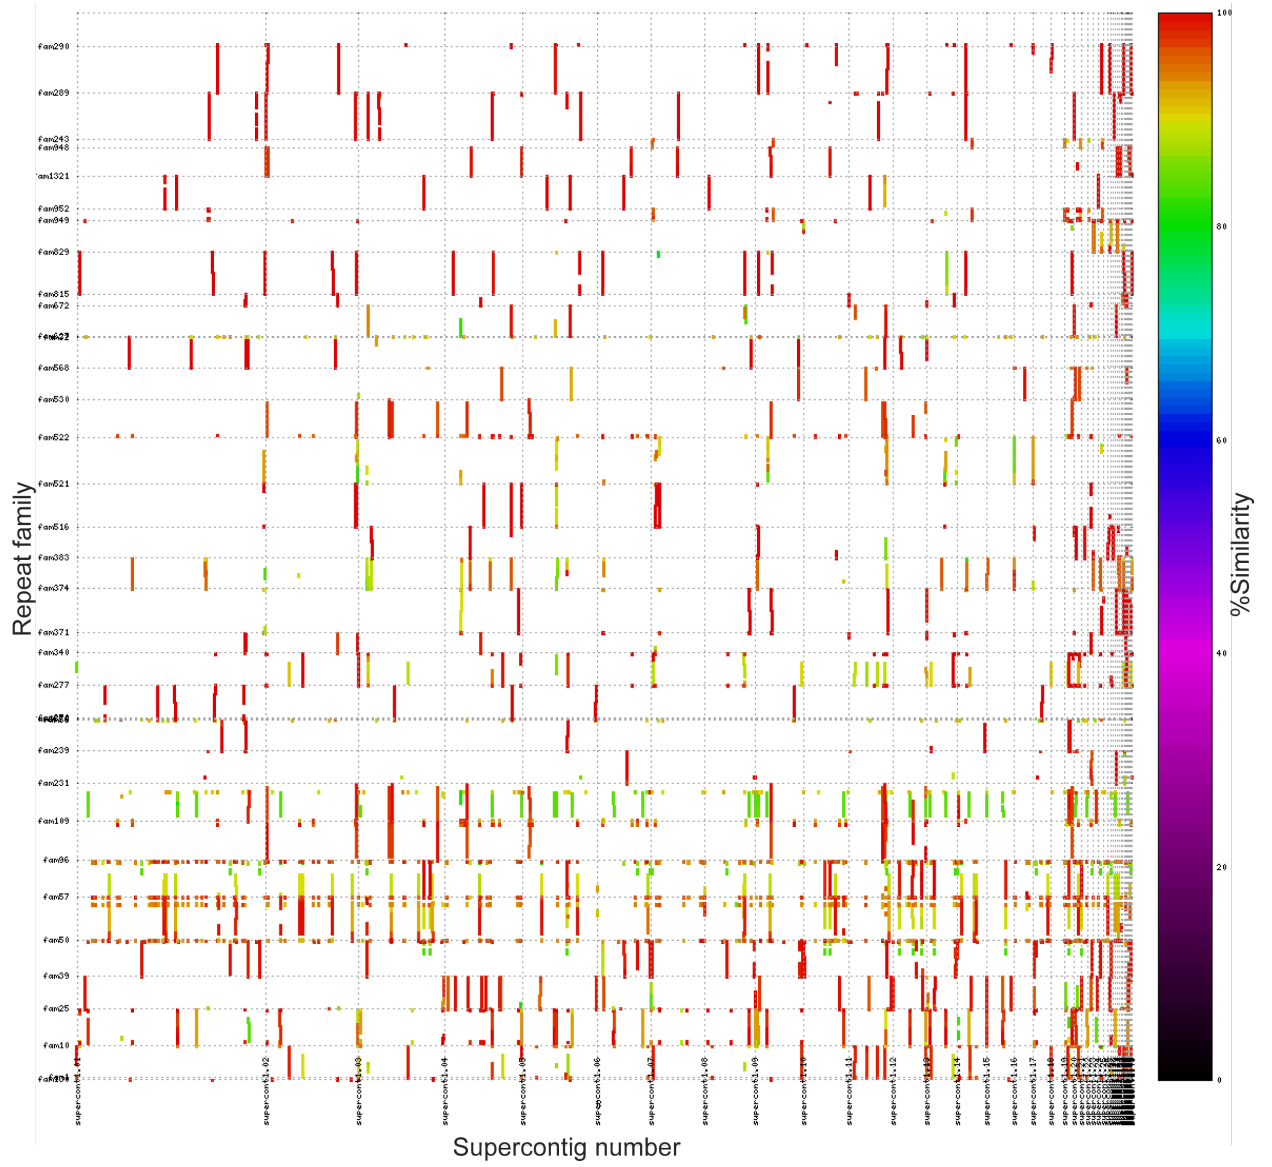

B

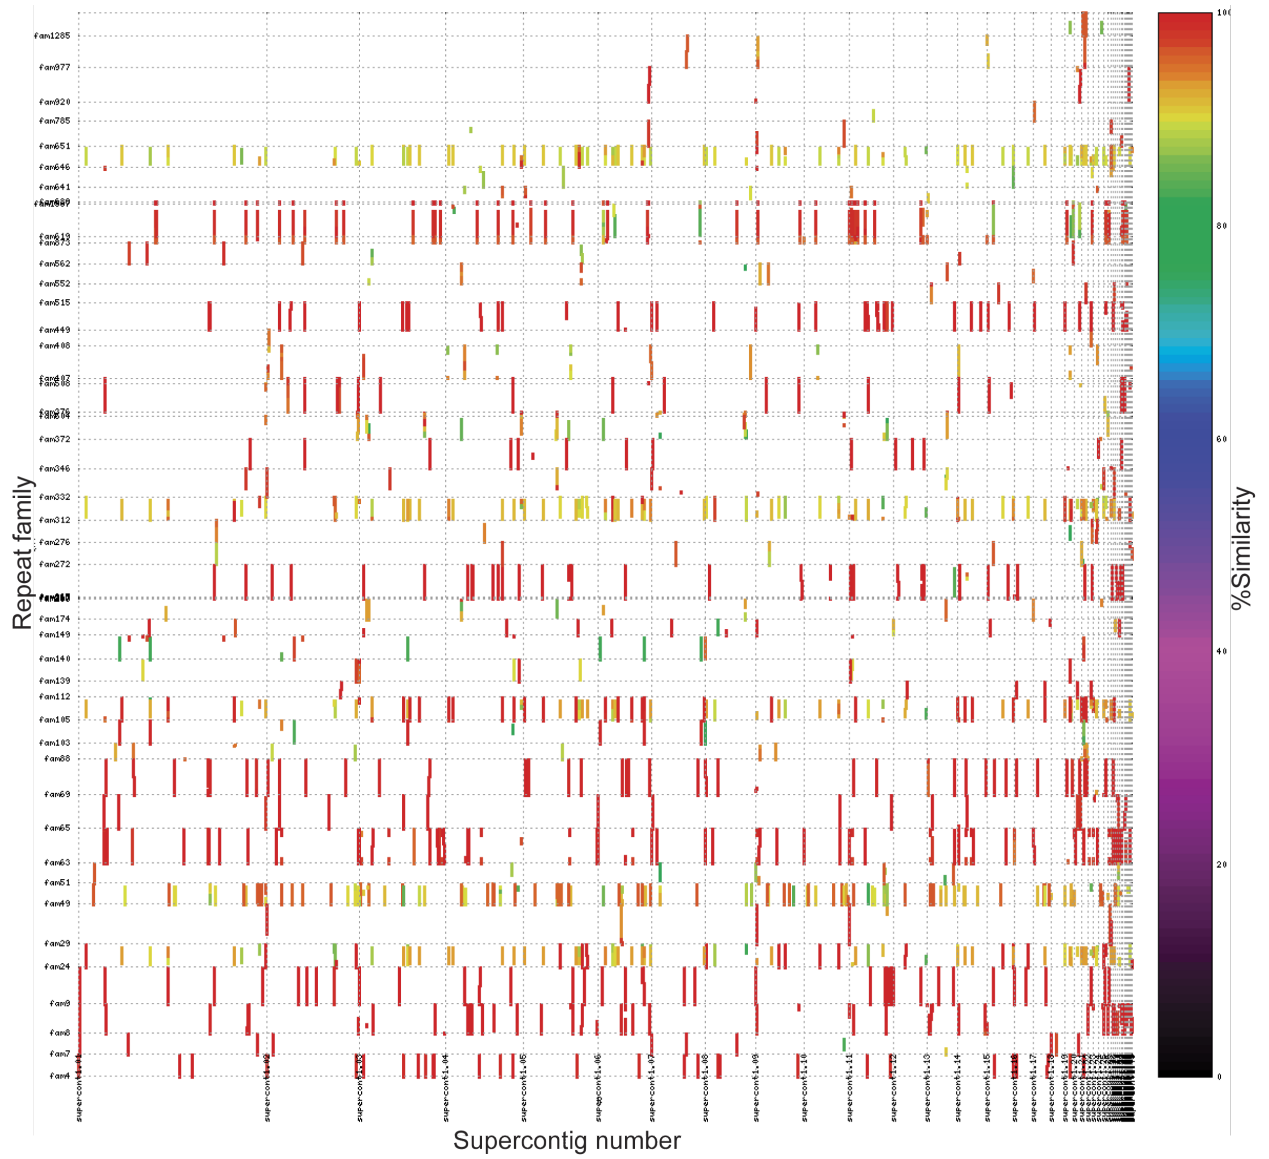

C

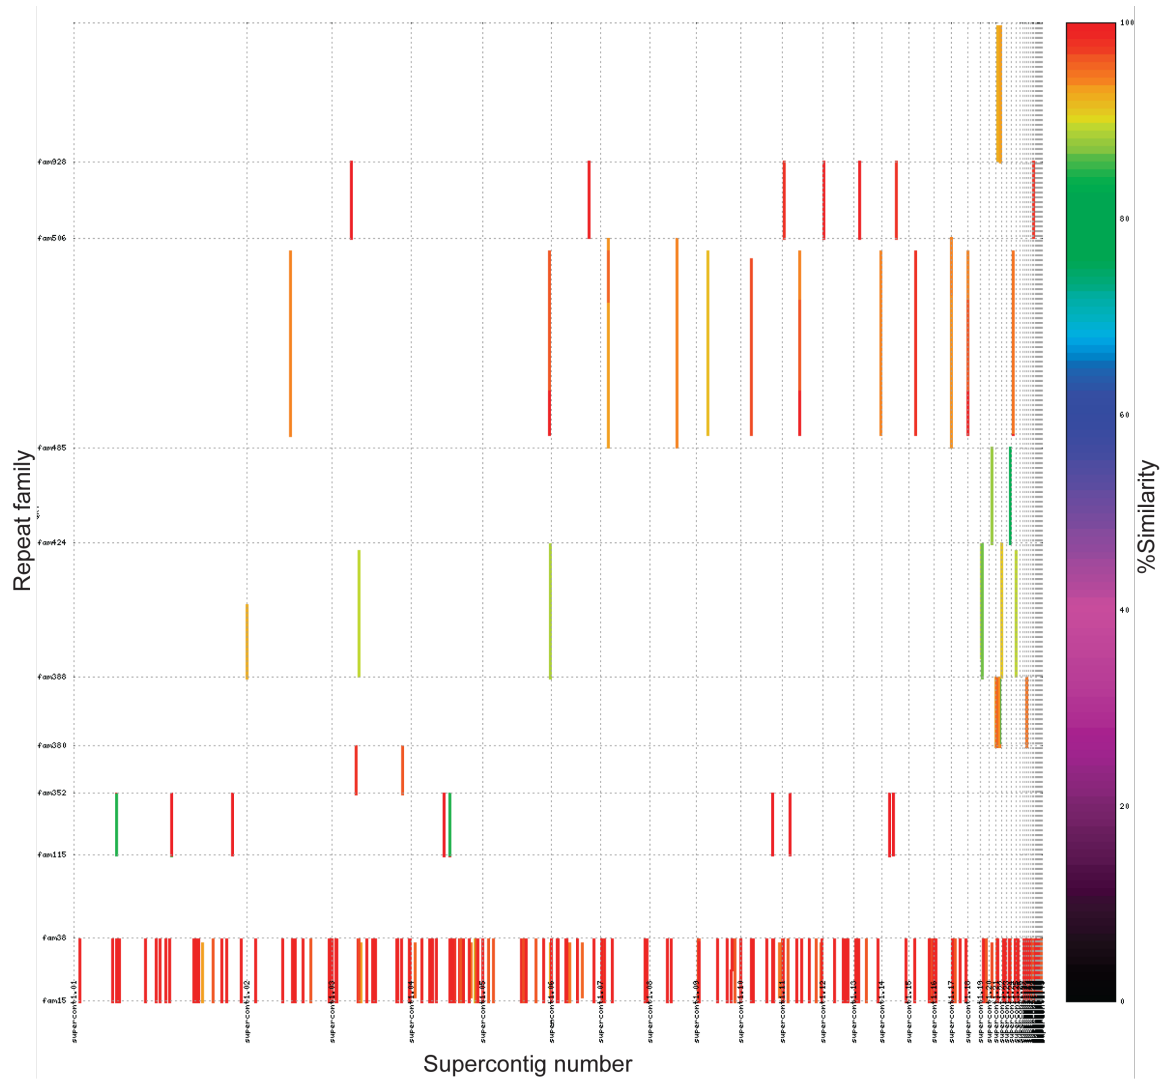

**Figure S1** Similarity and distribution of (A) LTR retrotransposons, (B) DNA transposons and (C) MITES across the Supercontig assemblies of BFP-ToxAC. The repeat family name is indicated on the left. The color scale on the right indicates % similarity from 0 (black) to 100 (red).
