# Supplementary material for: Comparative Genomics of a Plant-Pathogenic Fungus, Pyrenophora tritici-repentis, Reveals Transduplication and the Impact of Repeat Elements on Pathogenicity and Population Divergence
Source: PubMed Central journal article supplement (PMC3538342; doi:10.1534/g3.112.004044), 2013-01-01
Supplement: supp_3.1.41_FigureS2.pdf [file supp_3.1.41_FigureS2.pdf]

A Glycosyl\_hydrolase-associated Pfam

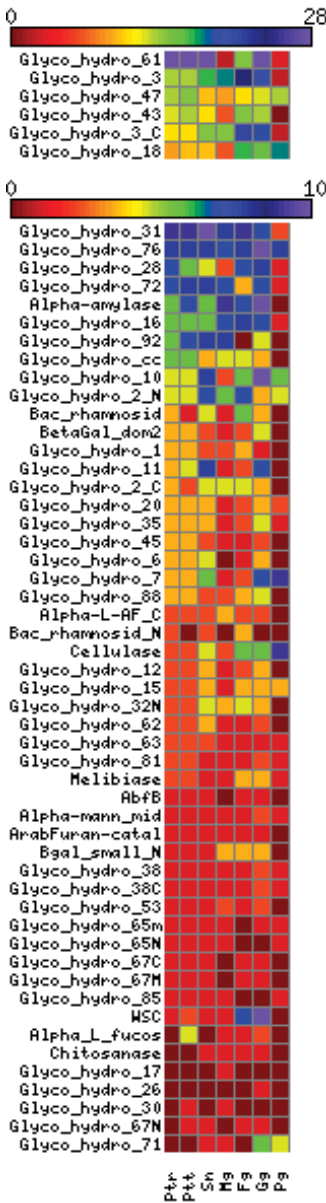

Other Cazy-associated Pfam

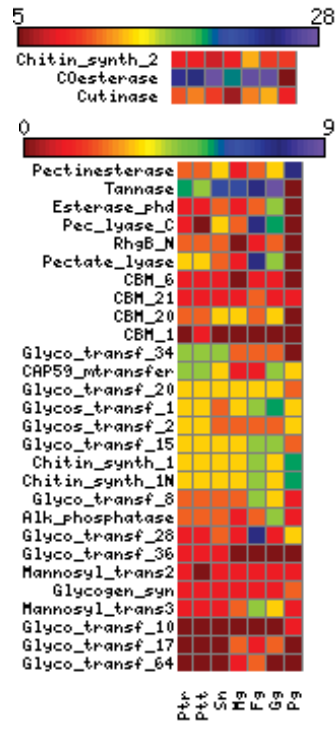

Ptt – *Pyrenophora teres f. teres*  
 Sn – *Stagonospora nodorum*  
 Mg – *Mycosphaerella graminicola*  
 Fg – *Fusarium graminearum*  
 Gg – *Glomerella graminicola*  
 Pg – *Puccinia graminis*

Other Cell Wall enzyme-associated Pfam

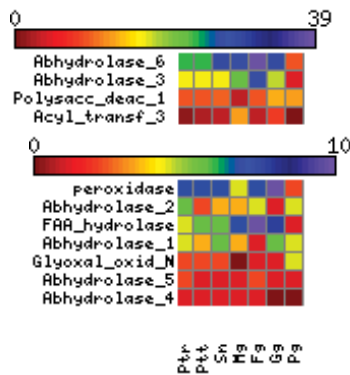

B

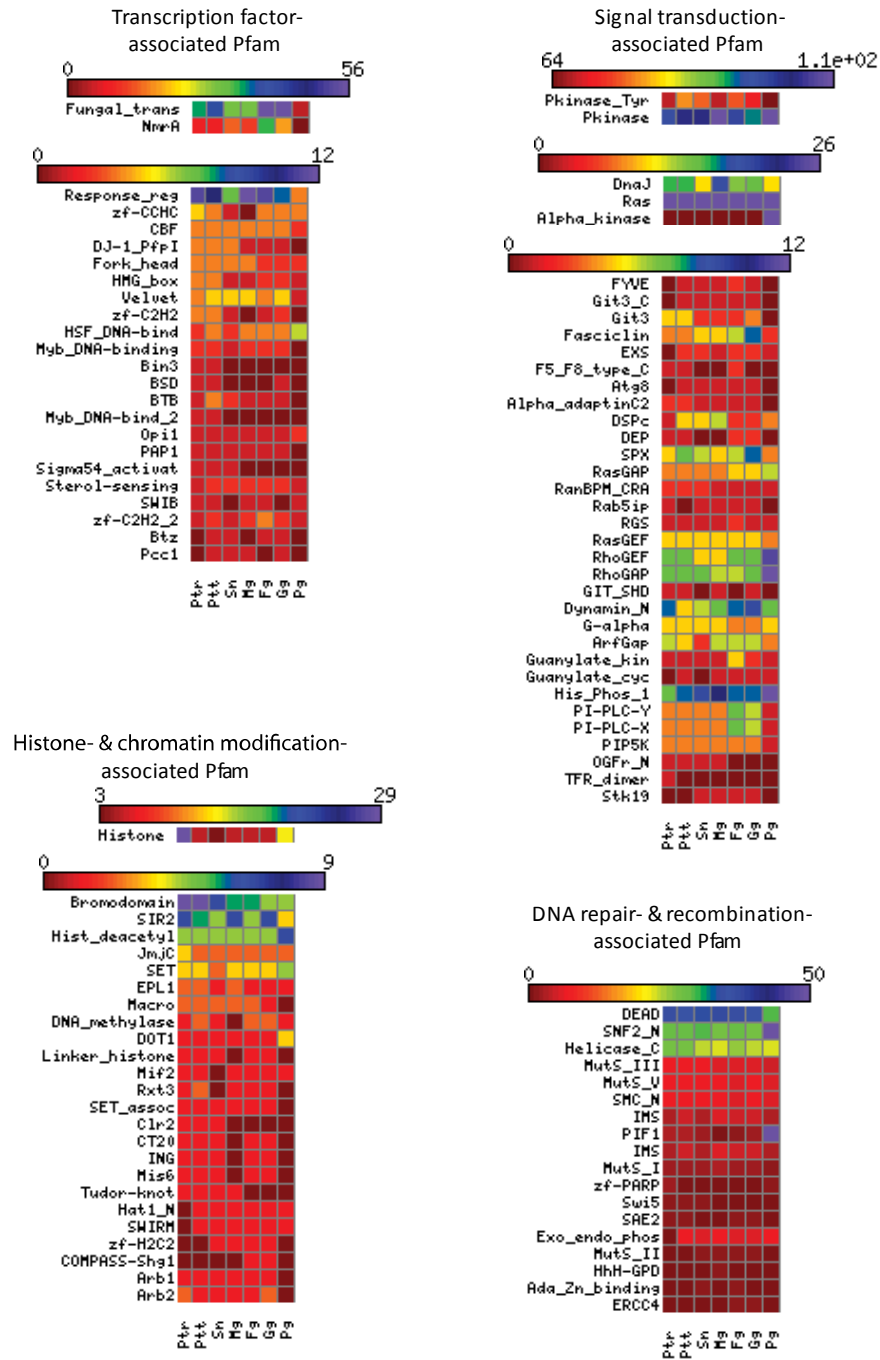

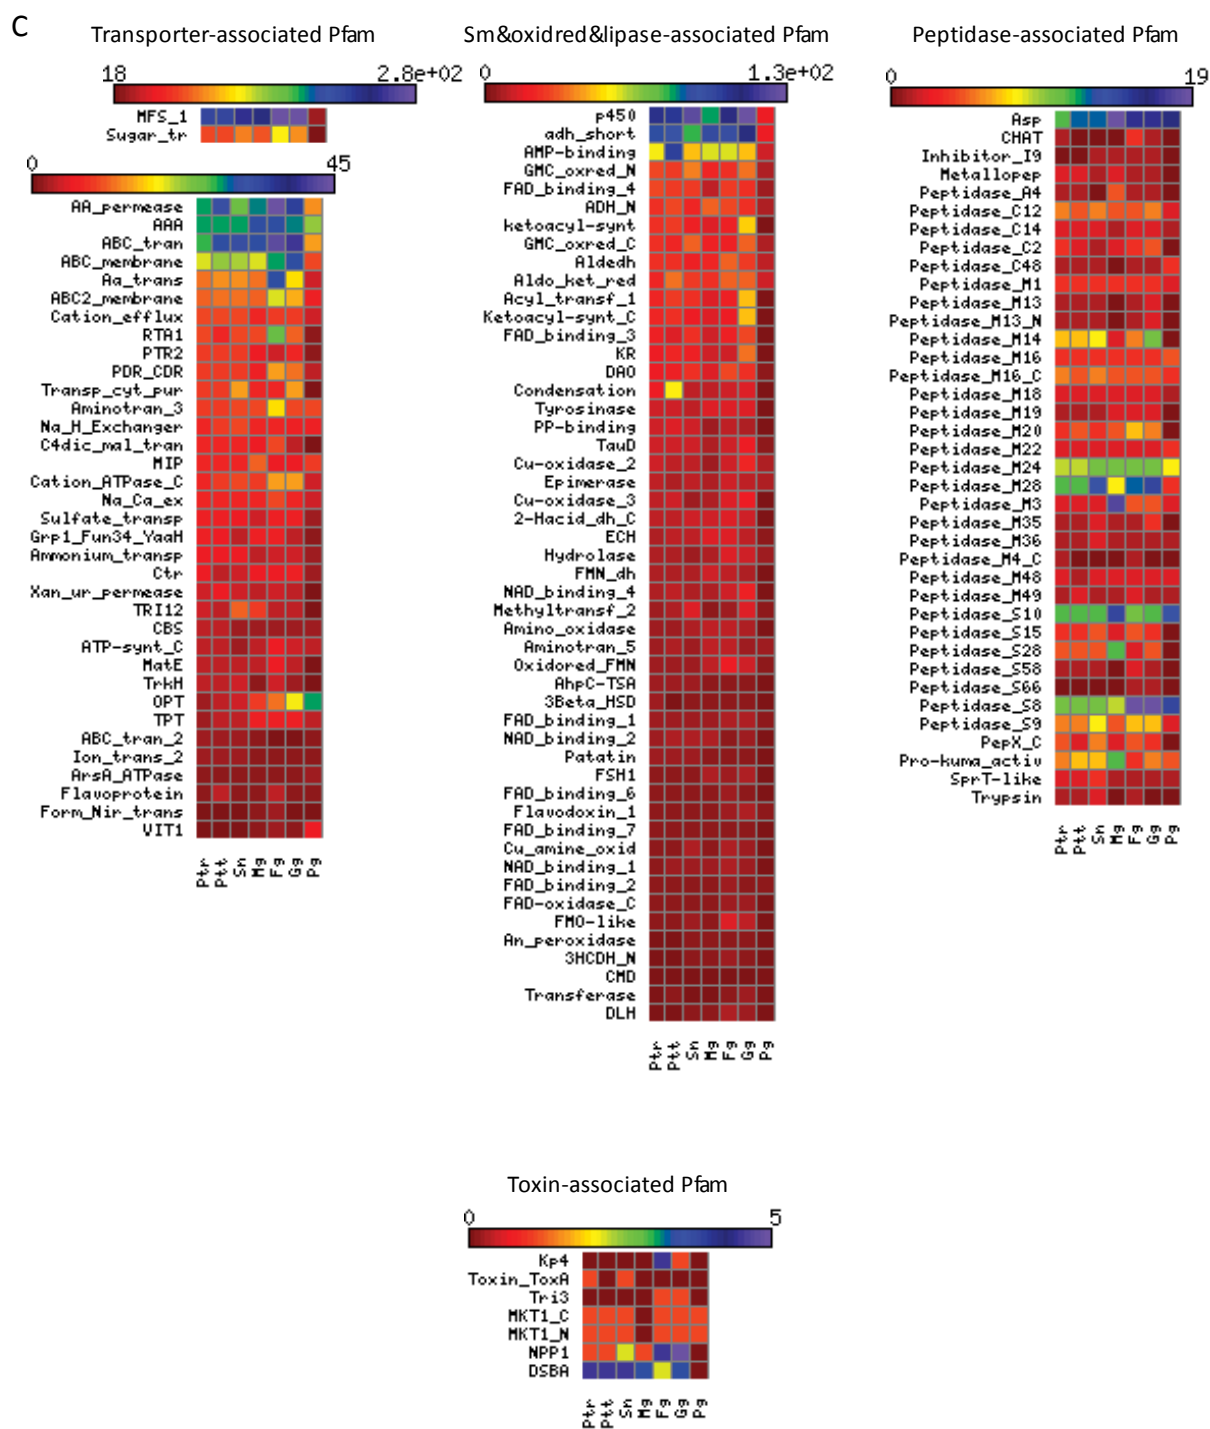

**Figure S2** Heat map of Pfam domains for (A) carbohydrate active enzymes and other cell wall enzymes, (B) proteins involved in sensing and response (C) proteins associated with transport, oxidative stress and toxin activity present in *Ptr* and other cereal pathogens.
