# Supplementary material for: Comparative Genomics of a Plant-Pathogenic Fungus, Pyrenophora tritici-repentis, Reveals Transduplication and the Impact of Repeat Elements on Pathogenicity and Population Divergence
Source: PubMed Central journal article supplement (PMC3538342; doi:10.1534/g3.112.004044), 2013-01-01
Supplement: supp_3.1.41_FigureS8.pdf [file supp_3.1.41_FigureS8.pdf]

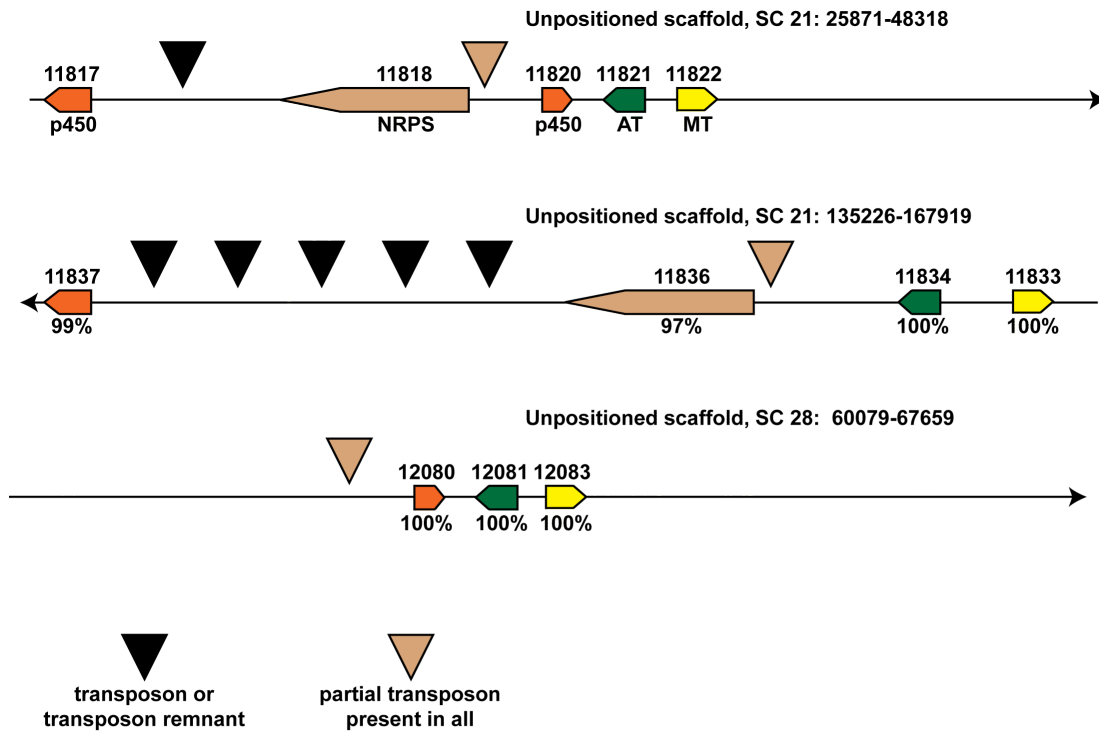

**Figure S8** Duplicated genomic regions associated with the NRPSs PTRG\_11818 & 11836. Putative proteins are designated as arrows. Proteins with similar function are coded with similar color. AT - acyltransferase; MT - methyltransferase. Protein coding regions and spacing between are to scale. Numbers above boxes indicate locus position in the reference. Numbers beneath boxes represent the % identity of the proteins relative to PTRG\_11817 through 11822. Triangles represent transposons or transposon remnants.
