# Supplementary material for: Comparative Genomics of a Plant-Pathogenic Fungus, Pyrenophora tritici-repentis, Reveals Transduplication and the Impact of Repeat Elements on Pathogenicity and Population Divergence
Source: G3 (Bethesda). 2013 Jan 1;3(1):41–63. doi: 10.1534/g3.112.004044 (PMC3538342; doi:10.1534/g3.112.004044)
Supplement: Supporting Information [file supp_3.1.41_TableS5.xlsx]

## Sheet: TableS4
Table S4 Repeat families in P. tritici-repentis
Family	Annotation	Total of genome (bp)	% of total repeats	CAtoTA RIP Index	ESTs BFP-ToxA/C	ESTs BFP-ToxA/C in planta	DW7-ToxB RPKM	% of total reads mapped to repeats	SD20-NP RPKM	% of total reads mapped to repeats	ESTs SD20-NP	ESTs SO3-P
	DNA transposons
4	Pogo	68178	1.11604	3.41593	2		3840	1.40514	579	0.304089	1	5
7	TIR, Fot5	34898	0.571265	2.5124			952	0.348357	339	0.178042	1	2
8	IR [18-35/59-42] called as protein; (frame -2, hAT domain)	116805	1.91205	1.7619	4		22817	8.34922	2160	1.13442		9
9	(called as protein (frame +3), unique to PTR; adjacent to transposase(frame -2)	129195	2.11486	0.428571	5	1	5367	1.9639	14	0.00735275		14
24	Pogo	40538	0.663589	1.39344	12		2955	1.0813	742	0.389696	4	6
29	IR [3548-3578/3670-3640]; (frame -2, hAT domain)	25327	0.414592	4.21429			181	0.0662317	549	0.288333
49	TIR, Fot5	235145	3.84922	1.45339	12		8646	3.16375	2838	1.49051	1	12
51	TIR, Fot5	23091	0.377989	1.57377			141	0.0515949	328	0.172264
63	(frame +2, hAT domain)	188069	3.07861	1.85965	3		19159	7.01068	5427	2.85024		5
65	(frame +3, hAT domain)	60409	0.988868	2.54878	11		1250	0.457401	625	0.328248	4	6
69		143868	2.35505	1.40146	10		6188	2.26432	1180	0.619732
88	TIR	21177	0.346658	0.969474	8		299	0.10941	339	0.178042		5
103	Pogo	19328	0.316391	0.918919			115	0.0420809	180	0.0945353		3
105	Pogo	91324	1.49493	2.02098	3		5666	2.07331	708	0.371839		2
112	TIR	11682	0.191229	0.448276	2		86	0.0314692	70	0.0367637
139	Pogo	19558	0.320156	3.26531			54	0.0197597	213	0.111867
140	Pogo	44636	0.730671	0.382979	2		155	0.0567178	295	0.154933		1
149	TIR	39858	0.652458	0.575758	6		1924	0.704032	47	0.0246842		1
174	TIR, Fot5	23382	0.382753	1.31568			102	0.0373239	214	0.112392
265	IR [12-30/118-100]; (frame -1, hAT domain)	129558	2.12081	0.420561	8		6102	2.23285	133	0.0698511
266	266-267-265 always in order	2327	0.0380919	0	6		1720	0.629384	111	0.0582968
267	266-267-265 always in order	5665	0.0927335		6		4351	1.59212	347	0.182243
272	Pogo	37827	0.619211	1.38142			128	0.0468379	264	0.138652		2
276		10177	0.166593	1.09701			29	0.0106117	211	0.110816
312	Pogo	52623	0.861415	3.44828	4		211	0.0772093	394	0.206927
332	TIR, Fot5	25020	0.409566	4.18692	2		219	0.0801367	133	0.0698511		1
346	IR [2624-2645/2673-2652]; (frame -3, hAT domain)	44254	0.724418	0.0625	4		1920	0.702568	1	0.000525196
372		40801	0.667894	0.434468			294	0.107581	1522	0.799349		1
376		70474	1.15363	2.13158	15	8	2133	0.78051	240	0.126047		39
400	Histone H3	93744	1.53455	1.08108	4		3869	1.41575	1294	0.679604	2	10
407		43286	0.708572	2.36486	2		378	0.138318	1077	0.565636		2
408	Fot5	11616	0.190149	1.13793			101	0.036958	166	0.0871826
449		110010	1.80081	1.21839	2		7535	2.75722	161	0.0845566		2
508	assoc 376	8512	0.139338	2.66667	6		1434	0.524731	247	0.129723
515	TIR, Pogo	13503	0.221038	1.61194	2		83	0.0303714	142	0.0745779
552	TIR, Fot5	12074	0.197646	2.60648			83	0.0303714	169	0.0887582		2
562	Pogo	34626	0.566812	1.10947			66	0.0241508	206	0.10819
604	assoc 372	2067	0.0338359	0.465116			74	0.0270782	255	0.133925		1
619	IR [2776-2804/2848-2820]; (frame -2, hAT domain); frame -2 has two different proteins with 96% identical aa on 3' end --> PTRG_09332 ankyrin repeat domain containing protein; PTRG_02607 benomyl/methotrexate resistance protein; frame +3 has another predic	136370	2.23232	0.731838	6		6949	2.54279	2370	1.24472		4
638		6069	0.0993468	0.846154			124	0.0453742	408	0.21428
641	Pogo	38440	0.629246	0.982759	2		124	0.0453742	408	0.21428	2	3
646	Pogo	17526	0.286893	0.444444	2		106	0.0387876	365	0.191697	4
651		10051	0.16453	1.408	6		69	0.0252486	404	0.212179	2
785		11120	0.182029	1.14706			98	0.0358603	666	0.349781
873	873-619-1587 always in this order	24832	0.406489	0.818182	2		5490	2.00891	904	0.474777		1
920		24281	0.397469	0.785714			78	0.0285418	369	0.193797
977		12205	0.19979	1.63736	4	9	215	0.078673	358	0.18802		7
1285	TIR, Fot5	14854	0.243153	0.887097			65	0.0237849	85	0.0446417
1587	873-619-1587 always in this order, IR [23-46/181-158]	9307	0.152351	0.625			3202	1.17168	1106	0.580867
	Family totals	2389687	39.1181		31 families	3 families	127147	46.5258	31363	16.4717	9 families	26 families
	LTR retroposon
1	Ty1/Copia	93805	1.53555	0.613538	5		3267	1.19546	833	0.437489		12
10	Ty1/Copia	220245	3.60531	0.672833	11		8286	3.03202	982	0.515743		6
25	Ty3/Gypsy	202097	3.30824	0.580624	14		5655	2.06928	2689	1.41225		12
32	assoc 568 (LTRs and soloLTRs)	10277	0.16823	0.395973	3		914	0.334452	937	0.492109
39	(integrase)	146886	2.40446	1.86312	1		11776	4.30909	2189	1.14965		7
50	(integrase)	219846	3.59878	0.492248	48	17	7183	2.62841	5140	2.69951	20	33
56	56-1570-270 always in order	12645	0.206993	0.776596	9		1555	0.569007	792	0.415955	2	16
57	(integrase)	101805	1.6665	0.6917	2	2	1657	0.606331	2092	1.09871		11
96	Ty3/Gypsy	31714	0.519144	0.0273973	2		1395	0.51046	460	0.24159		15
109	Ty1/Copia	40942	0.670202	1.62678	14	6	962	0.352016	3004	1.57769	12	5
128	Ty3/Gypsy	44507	0.72856	0.281437	8	1	1467	0.536806	2077	1.09083	2	10
130	assoc 109 ??	4338	0.0710111	1.09091	7		229	0.0837959	168	0.088233	2
231	Ty1/Copia	26929	0.440816	0.941176			186	0.0680613	490	0.257346
239	Ty1/Copia	47759	0.781793	0.423656	1		357	0.130634	1078	0.566162	2	5
243	skippy	107863	1.76567	0.3			4021	1.47137	1648	0.865523		2
270	(integrase)	54586	0.893548	3.47945	4		858	0.31396	21	0.0110291	2	6
277	Ty1/Copia	79939	1.30857	2.72299	48	23	2559	0.936392	1583	0.831386		49
289	(called as protein, maybe it is not one)	103565	1.69531	0.625	5		2338	0.855523	283	0.148631		4
290	assoc 289	8005	0.131038	0	3		1318	0.482284	147	0.0772039
340	Ty1/Copia	27012	0.442174	3.07692	2		1924	0.704032	426	0.223734		2
371	(called as protein, maybe it is not one)	91070	1.49078	2.7374	16	5	2340	0.856255	765	0.401775		3
374	Ty1/Copia	148894	2.43733	1.73864	4		4119	1.50723	1532	0.804601
383	Ty1/Copia	58867	0.963626	0.9	7		1553	0.568275	512	0.268901	2	5
516	(called as protein, maybe it is not one)	67722	1.10858	4.17886	4	1	1052	0.384949	26	0.0136551		1
521	Ty1/Copia	73375	1.20112	1.89283	3		483	0.17674	818	0.429611
522	Ty3/Gypsy	29174	0.477565	1.14085	9	1	1398	0.511558	1452	0.762585		2
530	Ty1/Copia	61355	1.00435	0.820237	16	12	476	0.174178	371	0.194848		6
568	Ty1/Copia	51393	0.84128	0.230769			674	0.246631	68	0.0357133
627	Ty1/Copia	48212	0.789209	6.13596	1		646	0.236385	1807	0.94903	4	4
672	Ty1/Copia	19080	0.312331	4.84615			1299	0.475331	342	0.179617		2
815	(called as protein, maybe it is not one)	130269	2.13245	3.03704	2		1286	0.470574	240	0.126047
829	Ty1/Copia	38922	0.637136	0.5	6		165	0.060377	820	0.430661	3	4
948	pol polyprotein	7445	0.121871	1.05634			59	0.0215893	226	0.118694
949	Ty1/Copia	20015	0.327637	0.952688			274	0.100262	411	0.215856
952	(integrase)	63466	1.03891	4.08947	2		1756	0.642557	569	0.298837		2
1321	Ty1/Copia	58302	0.954378	0.845794			680	0.248826	2064	1.08401		2
1570	56-1570-270 always in order	1360	0.0222626		7		671	0.245533	129	0.0677503		10
	Family totals	2553686	41.8027		30 families	9 families	76838	28.1166	39191	20.583	10 families	27 families
	MITE
15		26886	0.440112	0.403509	8		794	0.290541	231	0.12132	4	5
38		13762	0.225278	0.136364	3		322	0.117827	7	0.00367637		6
115		1284	0.0210185	0.75			63	0.023053	42	0.0220582
352		2553	0.0417915	0.695652	2		113	0.0413491	302	0.158609		3
380		6779	0.110969	0.221429	1	1	281	0.102824	0	0
388		3686	0.0603382	0.383562			76	0.02781	291	0.152832		2
424		8530	0.139632	0.477654	1		143	0.0523267	671	0.352407
485		5469	0.0895251	0.575221			127	0.046472	350	0.183819
506		1674	0.0274026	0.666667			76	0.02781	160	0.0840314
928		3426	0.0560821	0.422535			162	0.0592792	73	0.0383393
	Family totals	74049	1.21215		5 families	1 family	2157	0.789292	2127	1.11709	1 family	4 families
	non-LTR retroposon
26		86499	1.41595	1.0359	2	2	5903	2.16003	23155	12.1609	2	4
27		106358	1.74103	1.06198	5		6469	2.36714	18219	9.56855		7
30		33175	0.54306	3.82222	2	1	450	0.164664	1438	0.755232	2	5
238	assoc 27	11038	0.180687	0.56	2		1096	0.401049	4028	2.11549
370		162246	2.65589	1.1339	2		5642	2.06453	2155	1.1318
585		6240	0.102146	0.863636			72	0.0263463	1088	0.571414
	Family totals	405556	6.63877		5 families	2 familes	19632	7.18376	50083	26.3034	2 families	3 familes
	Unknown
5		64115	1.04953	0.677255	33	6	2727	0.997867	7238	3.80137	21	31
11		55373	0.906431	0.244898	24		3921	1.43478	121	0.0635488	5	19
12		16012	0.262109	0.198529	5		1011	0.369946	3122	1.63966		4
14		14444	0.236442	0.661538	6		478	0.17491	1402	0.736325		1
17		9752	0.159636	1.5102			462	0.169056	1753	0.920669
18		1801	0.0294816	0.804348			227	0.0830641	569	0.298837	2	2
21		5043	0.0825516	0.680556	2		228	0.08343	629	0.330348	10	1
22		2587	0.042348	0.866667			223	0.0816004	709	0.372364		1
23		12716	0.208155	0.828571	6		3003	1.09886	3193	1.67695		9
31		7250	0.118679	1.66667			135	0.0493993	339	0.178042
34		5913	0.0967932	0.446154	17	2	261	0.0955054	1133	0.595047	4	6
35		10927	0.17887	0.710526	20	4	265	0.0969691	314	0.164912	6	8
53		3287	0.0538067	0.431373			106	0.0387876	286	0.150206		2
66		12859	0.210496	1.34483	3	2	698	0.255413	2296	1.20585		2
70		21825	0.357265	0.239437	2		430	0.157346	1235	0.648617	2	8
71		3548	0.0580792	1.31034			128	0.0468379	324	0.170164
77		12745	0.20863	0.732	8		814	0.29786	2258	1.18589	6	6
95		5514	0.0902617	0.384615	4		1426	0.521803	905	0.475303		12
97		2967	0.0485685	0.264706			103	0.0376899	286	0.150206		2
104		9278	0.151877	0.23622			427	0.156248	1342	0.704813
108		4052	0.0663294	3.33333	11		418	0.152955	764	0.40125		27
111		3297	0.0539704	0.909091			98	0.0358603	243	0.127623
116		1906	0.0312004	0.766667	16		133	0.0486675	1589	0.834537		8
117		4145	0.0678518	0.962963	2		123	0.0450083	346	0.181718		1
121	SINE	11661	0.190885	0.469697	89	60	861	0.315058	422	0.221633	20	83
125		4094	0.0670169	0.666667			115	0.0420809	332	0.174365	2
126		7463	0.122166	1.25			121	0.0442764	283	0.148631
127		29181	0.47768	3.28	16	4	3911	1.43112	2826	1.4842		8
142		2031	0.0332466	1			55	0.0201257	141	0.0740527
146		5273	0.0863166	1.26471	2		189	0.0691591	523	0.274678
147		12507	0.204734	0.977778	1		1311	0.479722	1530	0.80355		1
158		4442	0.0727135	0.545455	4		273	0.0998964	748	0.392847
160		4966	0.0812912	1.10714			156	0.0570837	462	0.242641
161		5070	0.0829936	0.916667	3		347	0.126975	690	0.362385		1
170		7324	0.119891	0.340909	4		198	0.0724524	617	0.324046
198		21152	0.346249	0	8	2	2066	0.755993	2	0.00105039		9
203		881	0.0144216	0.222222			98	0.0358603	125	0.0656495
204		32046	0.524579	0.232143	2		605	0.221382	1540	0.808802	4	2
217		2049	0.0335412	0.283019			93	0.0340307	181	0.0950605		2
223		4828	0.0790322	0.826923	2		263	0.0962372	735	0.386019		2
229		4390	0.0718623	0.886364	2		244	0.0892847	998	0.524146
232		5774	0.0945178	0.85	2		271	0.0991646	877	0.460597
237		26536	0.434382	0.580247	2		4212	1.54126	819	0.430136		2
242		6788	0.111117	1.37736			312	0.114167	942	0.494735	2
268	no domain	21027	0.344203	0.821429	10	2	2745	1.00445	1878	0.986319		11
273	(assoc 69, assoc 383)	10576	0.173124	0.15	5		1337	0.489236	486	0.255245		5
275		9446	0.154627	0.488722	4	2	840	0.307374	2621	1.37654	1	3
288		13819	0.226211	0.423246	2		167	0.0611088	326	0.171214		4
293		6423	0.105142	0.654321	2		312	0.114167	3117	1.63704
301	No hit	33293	0.544991	0.932886	6		606	0.221748	586	0.307765		8
323		4295	0.0703072	0.372549			146	0.0534245	368	0.193272		1
354		3286	0.0537903	0.416667			179	0.0654999	894	0.469525
355		2453	0.0401545	1.22727			109	0.0398854	300	0.157559
375		14955	0.244807	0.347826	7		3973	1.4538	2575	1.35238	2	7
403		12293	0.201231	0.469565	5		882	0.322742	2774	1.45689	4	4
477		1949	0.0319043	1.11538	2		93	0.0340307	220	0.115543		2
527		2478	0.0405637	0.439024			96	0.0351284	553	0.290434
532		1723	0.0282047	0.6	4		79	0.0289078	539	0.283081
538		1532	0.0250782	0.357143			77	0.0281759	207	0.108716
550		1731	0.0283357	0.913043			108	0.0395195	210	0.110291
553		3132	0.0512694	1.62069			100	0.0365921	283	0.148631
567		1826	0.0298908	0.266667			87	0.0318351	199	0.104514		2
574		3488	0.057097	0.352941	5	2	245	0.0896507	1047	0.549881		15
826	assoc 1621	3351	0.0548544	0.984848			113	0.0413491	693	0.363961		1
827		7246	0.118614	0.5	4	2	63	0.023053	100	0.0525196		2
947	no domain	21360	0.349654	0			252	0.0922121	325	0.170689
1156	SINE	14090	0.230647	0	133	134	1310	0.479357	0	0		152
1621	assoc 826	341	0.00558202	0.583333			44	0.0161005	151	0.0793046
	Family totals	685925	11.2283		41 families	12 families	47509	17.3845	67641	35.5248	15 families	42 families
	Total	6108903	100		112 families	27 families	273283	100	190405	100	37 families	102 families
Rip index values high RIP>1.2; med RIP<=x=>1.2; low RIP=0.5
