# Supplementary material for: Comparative Genomics of a Plant-Pathogenic Fungus, Pyrenophora tritici-repentis, Reveals Transduplication and the Impact of Repeat Elements on Pathogenicity and Population Divergence
Source: G3 (Bethesda). 2013 Jan 1;3(1):41–63. doi: 10.1534/g3.112.004044 (PMC3538342; doi:10.1534/g3.112.004044)
Supplement: Supporting Information [file supp_3.1.41_TableS10.xlsx]

## Sheet: TableS10
Table S10 Histone genes present in P. tritici-repentis
Translation	Supercontig	Start	Stop	Strand	Locus	Gene	Name	Mutations (mut/766 bp)
MARTKPRPKVTGKAGRGGPDGKTVTGGKPAQKALASKARRQVAGKSTRKAPVAVKKKRKFKAGTVALREIKRYQRGFELLLRKLPFSRVVREFAQVHKADIRFQRSAIEALQEATEAFLVGYFEDCNINAIHAKRVTIQEKDSQLARRYFARELLAFL*	supercont1.1	1475998	1476763	-	PTRG_00559.1	histone	H3-like, variant 1
MARTKPRPKVTGKAGRGGPDGKTVTGGKPAQKALASKARRQVAGKSTRKAPVAVKKKRKFKAGTVALREIKRYQRGFELLLRKLPFSRVVREFAQVHKADIRFQRSAIEALQEATEAFLVGYFEDCNINAIHAKRVTIQEKDSQLARRYFARELLAFL*	supercont1.4	1743876	1744827	-	PTRG_04981.1	histone	H3-like, variant 1	silent, 3/766
MARTKPRPKVTGKAGRGGPDGKTVTGGKPAQKALASKARRQVAGKSTRKAPVAVKKKRKFKAGTVALREIKRYQRGFELLLRKLPFSRVVREFAQVHKADIRFQRSAIEALQEATEAFLVGYFEDCNINAIHAKRVTIQEKDSQLARRYFARELLAFL*	supercont1.20	53010	53766	-	PTRG_11779.1	histone	H3-like, variant 1
MARTKPRPKVTGKAGRGGPDGKTVTGGKPAQKALASKARRQVAGKSTRKAPVAVKKKRKFKAGTVALREIKRYQRGFELLLRKLPFSRVVREFAQVHKADIRFQRSAIEALQEATEAFLVGYFEDCNINAIHAKRVTIQEKDSQLARRYFARELLAFL*	supercont1.3	303231	303924	+	PTRG_03510.1	histone	H3-like, variant 1	silent, 1/766
MARTKPRPKVTGKAGRGGPDGKTVTGGKPAQKALASKARRQVAGKSTRKAPVAVKKKRKFKAGTVALREIKRYQRGFELLLRKLPFSRVVREFAQVHKADIRFQRSAIEALQEATEAFLVGYFEDCNINAIHAKRVTIQEKDSQLARRYFARELLAFL*	supercont1.5	1590310	1591066	-	PTRG_05850.1	histone	H3-like, variant 1
MARTKPRPKVTGKAGRGGPDGKTVTGGKPAQKALASKARRQVAGKSTRKAPVAVKKKRKFKAGTVALREIKRYQRGFELLLRKLPFSRVVREFAQVHKADIRFQRSAIEALQEATEAFLVGYFEDCNINAIHAKRVTIQEKDSQLARRYFARELLAFL*	supercont1.8	1414665	1415619	-	PTRG_08022.1	histone	H3-like, variant 1
MARTKPRPKVTGKAGRGGPDGKTVTGGKPAQKALASKARRQVAGKSTRKAPVAVKKKRKFKAGTVALREIKRYQRGFELLLRKLPFSRVVREFAQVHKADIRFQRSAIEALQEATEAFLVGYFEDCNINAIHAKRVTIQEKDSQLARRYFARELLAFL*	supercont1.13	1006106	1006678	-	PTRG_10416.1	histone	H3-like, variant 1	silent, 2/766
MARTKPRPKVTGKAGRGGPDGKTVTGGKPAQKALASKARRQVAGKSTRKAPVAVKKKRKFKAGTVALREIKRYQRGFELLLRKLPFSRVVREFAQVHKADIRFQRSAIEALQEATEAFLVGYFEDCNINAIHAKRVTIQEKDSQLARRYFARELLAFL*	supercont1.2	43172	43825	-	PTRG_02306.1	histone	H3-like, variant 1	silent, 1/766
MARTKPRPKVTGKAGRGGPDGKTVTGGKPAQKALASKARRQVAGKSTRKAPVAVKKKRKFKAGTVALREIKRYQRGFELLLRKLPFSRVVREFAQVHKADIRFQRSAIEALQEATEAFLVGYFEDCNINAIHAKRVTIQEKDSQLARRYFARELLAFL*	supercont1.6	1619569	1620523	-	PTRG_06765.1	histone	H3-like, variant 1
MARTKPRPKVTGKAGRGGPDGKTVTGGKPAQKALASKARRQVAGKSTRKAPVAVKKKRKFKAGTVALREIKRYQRGFELLLRKLPFSRVVREFAQVHKADIRFQRSAIEALQEATEAFLVGYFEDCNINAIHAKRVTIQEKDSQLARRYFARELLAFL*	supercont1.25	97346	98043	-	PTRG_12006.1	histone	H3-like, variant 1	silent, 1/766
MARTKPRPKVTGKAGRGGPDGKTVTGGKPAQKALASKARRQVAGKSTRKAPVAVKKKRKFKAGTVALREIKRYQRGFELLLRKLPFSRVVREFAQVHKADIRFQRSAIEALQEATEAFLVGYFEDCNINAIHAKRVTIQEKDSQLARRYFARELLAFL*	supercont1.4	2769991	2770939	-	PTRG_05291.1	histone	H3-like, variant 1	silent, 2/766
MARTKPRPKVTGKAGRGGPDGKTVTGGKPAQKALASKARRQVAGKSTRKAPVAVKKKRKFKAGTVALREIKRYQRGFELLLRKLPFSRVVREFAQVHKADIRFQRSAIEALQEATEAFLVGYFEDCNINAIHAKRVTIQEKDSQLARRYFARELLAFL*	supercont1.9	458631	459572	-	PTRG_08245.1	histone	H3-like, variant 1	silent, 1/766
MARTKPRPKVTGKAGRGGPDGKTVTGGKPAQKALASKARRQVAGKSTRKAPVAVKKKRKFKAGTVALREIKRYQRGFELLLRKLPFSRVVREFAQVHKADIRFQRSAIEALQEATEAFLVGYFEDCNINAIHAKRVTIQEKDSQLARRYFARELLAFL*	supercont1.14	317485	318250	+	PTRG_10531.1	histone	H3-like, variant 1
MARTKPRPKVTGKAGRGGPDGKTVTGGKPAQKALASKARRQVAGKSTRKAPVAVKKKRKFKAGTVALREIKRYQRGFELLLRKLPFSRVVREFAQVHKADIRFQRSAIEALQEATEAFLVGYFEDCNINAIHAKRVTIQEKDSQLARRYFARELLAFL*	supercont1.1	4978013	4978967	+	PTRG_01743.1	histone	H3-like, variant 1
MARTKPRPKVTGKAGRGGPDGKTVTGGKPAQKALASKARRQVAGKSTRKAPVAVKKKRKFKAGTVALREIKRYQRGFELLLRKLPFSRVVREFAQVHKADIRFQRSAIEALQEATEAFLVGYFEDCNINAIHAKRVTIQEKDSQLARRYFARELLAFL*	supercont1.5	303946	304900	+	PTRG_05395.1	histone	H3-like, variant 1
MARTKPRPKVTGKAGRGGPDGKTVTGGKPAQKALASKARRQVAGKSTRKAPVAVKKKRKFKAGTVALREIKRYQRGFELLLRKLPFSRVVREFAQVHKADIRFQRSAIEALQEATEAFLVGYFEDCNINAIHAKRVTIQEKDSQLARRYFARELLAFL*	supercont1.3	1754879	1755644	-	PTRG_03978.1	histone	H3-like, variant 1
MARTKPRPKVTGKAGRGGPDGKTVTGGKPAQKALASKARRQVAGKSTRKAPVAVKKKRKFKAGTVALREIKRYQRGFELLLRKLPFSRVVREFAQVHKADIRFQRSAIEALQEATEAFLVGYFEDCNINAIHAKRVTIQEKDSQLARRYFARELLAFL*	supercont1.17	625949	626642	+	PTRG_11535.1	histone	H3-like, variant 1	silent, 1/766
MARTKPRPKVTGKAGRGGPDGKTVTGGKPAQKALASKARRQVAGKSTRKAPVAVKKKRKFKAGTVALREIKRYQRGFELLLRKLPFSRVVREFAQVHKADIRFQRSAIEALQEATEAFLVGYFEDCNINAIHAKRVTIQEKDSQLARRYFARELLAFL*	supercont1.5	792188	792953	+	PTRG_05574.1	histone	H3-like, variant 1
MARTKPRPKVTGKAGRGGPDGKTVTGGKPAQKALASKARRQVAGKSTRKAPVAVKKKRKFKAGTVALREIKRYQRGFELLLRKLPFSRVVREFAQVHKADIRFQRSAIEALQEATEAFLVGYFEDCNINAIHAKRVTIQEKDSQLARRYFARELLAFL*	supercont1.4	1316538	1317235	-	PTRG_04852.1	histone	H3-like, variant 1	silent, 1/766
MARTKPRPKVTGKAGRGGPDGKTVTGGKPAQKALASKARRQVAGKSTRKAPVAVKKKRKFKAGTVALREIKRYQRGFELLLRKLPFSRVVREFAQVHKADIRFQRSAIEALQEATEAFLVGYFEDCNINAIHAKRVTIQEKDSQLARRYFARELLAFL*	supercont1.9	1391088	1391853	+	PTRG_08571.1	histone	H3-like, variant 1
MARTKPRPKVTGKAGRGGPDGKTVTGGKPAQKALASKARRQVAGKSTRKAPVAVKKKRKFKAGTVALREIKRYQRGFELLLRKLPFSRVVREFAQVHKADIRFQRSAIEALQEATEAFLVGYFEDCNINAIHAKRVTIQEKDSQLARRYFARELLAFL*	supercont1.4	2655988	2656557	-	no PTRG#	histone	H3-like, variant 1
MARTKPRPKVTGKAGRGGPDGKTVTGGKPAQKALASKARRQVAGKSTRKAPVAVKKKRKFKAGTVALREIKRYQRGFGLLLRKLPFSRVVREFAQVHKADIRFQRSAIEALQEATEAFLVGYFEDCNINAIHAKRVTIQEKDSQLARRYFARELLAFL*	supercont1.9	579343	579915	-	PTRG_08268.1	histone	H3-like, variant 2	FELLL to FGLLL, 1/766
MARTKPRPKVTGKAGRGGPDGKTVTGGKPAQKALASKARRQVAGKSTRKAPVAVKKKRKFKAGTVALREIKRYQRGFELLLRKLPFSRVVREFAQVHKADIRFQRSAIEALQEATEAFLVGYFEDCNINAIHAKRVTIQEKDSQLARRYFARELLAFH*	supercont1.21	208431	209297	+	PTRG_11844.1	histone	H3-like, variant 3	AFL* to AFH*, 1/722, shorter alignment
MARTKPRPKVTGKAGRGGPDGKTVTGGKPAQKALASKARRQVAGKSTRKAPVAVKKKRKFKAGTVALREIKRYQRGFELLLRKLPFSRVVREFAQVHKADIRFQRSAIEALQEATEAFLVGYFEDCNINAIHAKRVNIQEKDSQLARRYFARELLAFL*	supercont1.3	506551	507123	-	PTRG_03547.1	histone	H3-like, variant 4	VTIQ to VNIQ, 1/766
MARTKPRPKVTGKAGRGGPDGKTVTGGKPAQKALASKARRQVAGKSTRKAPVAVKKKRKFKAGTVALREIKRYQRGFELLLRKLPFSRVVRELHRCTRPISAFNDLQSKLFRKLQKLS	supercont1.3	179471	180039	-	PTRG_03457.1	histone	H3-like, variant 5	frameshift, shorter ORF, 1/766
MARTKPRPKVTGKAGRGGP*	supercont1.4	712123	712904	-	PTRG_04674.1	histone	H3-like, variant 6	misannotated 5' end, frameshift, short ORF, 1/766
H3-like variant 1 sequence
MARTKPRPKVTGKAGRGGPDGKTVTGGKPAQKALASKARRQVAGKSTRKAPVAVKKKRKFKAGTVALREIKRYQRGFELLLRKLPFSRVVREFAQVHKADIRFQRSAIEALQEATEAFLVGYFEDCNINAIHAKRVTIQEKDSQLARRYFARELLAFL*
12 identical copies, 6 with one silent mutation, 2 with 2 silent mutations, 1 with 3 silent mutations, 3 with single missense mutations, 2 with frameshift mutations that result in one 5' and one 3' terminated ORF
Other Histone genes in P. tritici-repentis
MARTKQTARKSTGGKAPRKQLASKAARKSAPSTGGVKKPHRYKPGTVALREIRRYQKSTELLIRKLPFQRLVREIAQDFKSDLRFQSSAIGALQESVEAYLVSLFEDTNLCAIHAKRVTIQSKDIQLARRLRGERG*	supercont1.18	57079	57559	-	PTRG_11558.1	histone	H3
MTGRGKGGKGLGKGGAKRHRKILRDNIQGITKPAIRRLARRGGVKRISAMIYEETRGVLKTFLEGVIRDAVTYTEHAKRKTVTSLDVVYALKRQGRTLYGFGG*	supercont1.18	58005	58634	+	PTRG_11559.1	histone	H4-1
MTGRGKGGKGLGKGGAKRHRKILRDNIQGITKPAIRRLARRGGVKRISAMIYEETRGVLKTFLESVIRDAVTYTEHAKRKTVTSLDVVYALKRQGRTLYGFGG*	supercont1.1	5864778	5865734	-	PTRG_02039.1	histone	H4-2
MTGGKSGGKASGSKSSAQSRSSKAGLAFPVGRVHRLLRKGNYAQRVGAGAPVYLAAVLEYLAAEILELAGNAARDNKKTRIIPRHLQLAIRNDEELNKLLGHVTIAQGGVLPNIHQNLLPKKTAKPGKGPSQEL*	supercont1.2	2918862	2919780	+	PTRG_03280.1	histone	H2A
MPPKAQKTPTTGGKAPAGKAPAEKKEAGKKTAAPSGDKKKRTKTRKETYSSYIYKVLKQVHPDTGISNRAMSILNSFVNDIFERVATEASKLAAYNKKSTISSREIQTSVRLILPGELAKHAVSEGTKAVTKYSSSTK*	supercont1.2	2917678	2918594	-	PTRG_03279.1	histone	H2B
MAGGGKGKTGGKTGGKGDSNVKTPKSHSAKAGLQFPCGRIKRHLRNLTRQKTRIGAKASIYLTAVLEYLTAEVLELAGNAAKDLKVKRITPRHLQLAIRGDEELDTLIRATIAFGGVLPHINRALLLKVEQKKKGGAAKVEA*	supercont1.1	2779367	2779954	-	PTRG_01014.1	H2A variant	H2A.Z
MAPKSPARRNKARPSRGGRVSVGSRKESGKRLGQPGPAPDRAKKRYKPGTVALREIKRYQKTTDLLLLKLPFQRLVREIAQSVTTEDGPNRWQSQAIMALQEATEAFLVNLFHDANLCAIHAKRVTIQQKDIQLARRLRAAWGAPV*	supercont1.1	3718661	3719753	+	PTRG_01332.1	H3 variant	CenH3/CenpA
MPNERPKQFGGPSRYGASARPPVRLQPSAASTTPQTSRASQMGLGLGKGAAGLGRGKGIARGSLKRHMKIQKDNIYGVTKGDIRRLARRGGVKRISATIYDDVRDALKQRLRLILQRVCAIIDSSGRKTVSVSDIVFTLRGLGNPIYGFEPSFLR*	supercont1.10	806804	807563	+	PTRG_09006.1	histone	H4 variant
Histone genes in Stagonospora nodorum
MARTKQTARKSTGGKAPRKQLASKAARKSAPSTGGVKKPHRYKPGTVALREIRRYQKSTELLIRKLPFQRLVREIAQDFKSDLRFQSSAIGALQESVEAYLVSLFEDTNLCAIHAKRVTIQSKDIQLARRLRGERG*					SNOG_03319	hH3	H3
MAPKTPDRRNKARPSRGGRASTGSRGGGGGAVGAGGRRESGKRPVVRAHVLTCITVGQAGPAPDRAKKRYKPGTVALREIRRYQKSTDLLLLRTPFQRLVREIAQTVTTETGPTRWQSQAIQALQEATEAFLVNLFHDANLCAIHAKRVTIQQKDIQLARRLRAAWGAPV					SNOG_15370	hH3v	CenH3/CenpA
MTGRGKGGKGLGKGGAKRHRKILRDNIQGITKPAIRRLARRGGVKRISAMIYEETRGVLKTFLEGVIRDAVTYTEHAKRKTVTSLDVVYALKRQGRTLYGFGG					SNOG_03320	hH4-1	H4-1
MTGRGKGGKGLGKGGAKRHRKILRDNIQGITKPAIRRLARRGGVKRISAMIYEETRGVLKTFLESVIRDAVTYTEHAKRKTVTSLDVVYALKRQGRTLYGFGG					SNOG_14904	hH4-2	H4-2
MTGGKSGGKASGSKSSAQSRSSKAGLAFPVGRVHRLLRKGNYAQRVGAGAPVYLAAVLEYLAAEILELAGNAARDNKKTRIIPRHLQLAIRNDEELNKLLGHVTIAQGGVLPNIHQNLLPKKTAKPGKGPSQEL					SNOG_14611	hH2A	H2A
MPPKAQKTPTTGGKAPAGKAPVEKKEAGKKTAAPSGEKKKRTKTRKETYSSYIYKVLKQVHPDTGISNRAMSILNSFVTTTHIFERVATEASKLAAYNKKSTISSREIQTSVRLILPGELAKHAVSEGTKAVTKYSSSTK					SNOG_14612	hH2B	H2B
MAGGKDRAIGSWKTNCDAGKTGGKTGGKGDSHVKTTKSHSAKAGLQFPCGRIKRHLRTITRQKTRIGAKASIYLTAVLEYLTAEVLELAGNAAKDLKVKRITPRHLQLAIRGDEELDTLIRATIAFGGVLPHINRALLLKVEQKKKGAKVEA					SNOG_09221	hH2Az	H2AZ
Histone genes in Neurospora crassa
MARTKQTARKSTGGKAPRKQLASKAARKSAPSTGGVKKPHRYKPGTVALREIRRYQKSTELLIRKLPFQRLVREIAQDFKSDLRFQSSAIGALQESVESYLVSLFEDTNLCAIHAKRVTIQSKDIQLARRLRGERN					NCU01635	hH3	H3
MPPKKGGVTKSKAVSKKAAAVPTPKATPPGRRKSRASSVQPGDPVPQGKKRRYRPGTLALKEIRNYQRTTDLLVAKLPFARLVREIAMQFRPMDEEMRWQSQAILALQEAAEAFLVHLFEDTNLCAIHAKRVTIMQKDIQLARRIRGVWGGAGWV					NCU00145	hH3v	CenH3/CenpA
MTGRGKGGKGLGKGGAKRHRKILRDNIQGITKPAIRRLARRGGVKRISAMIYEETRGVLKTFLEGVIRDAVTYTEHAKRKTVTSLDVVYALKRQGRTLYGFGG					NCU01634	hH4-1	H4-1
MTGRGKGGKGLGKGGAKRHRKILRDNIQGITKPAIRRLARRGGVKRISAMIYEETRGVLKTFLEGVIRDAVTYTEHAKRKTVTSLDVVYALKRQGRTLYGFGG					NCU00212	hH4-2	H4-2
MTGGGKSGGKASGSKNAQSRSSKAGLAFPVGRVHRLLRKGNYAQRVGAGAPVYLAAVLEYLAAEILELAGNAARDNKKTRIIPRHLQLAIRNDEELNKLLGHVTIAQGGVLPNIHQNLLPKKTGKTGKNASQEL					NCU02437	hH2A	H2A
MPPKPADKKPASKAPATASKAPEKKDAGKKTAASGDKKKRTKARKETYSSYIYKVLKQVHPDTGISNRAMSILNSFVNDIFERVATEASKLAAYNKKSTISSREIQTSVRLILPGELAKHAVSEGTKAVTKYSSSTK					NCU02435	hH2B	H2B
MAGGKGKSSGGKSSGGKTSGVEGPKKQQSHSARAGLQFPCGRVKRFLKQNTQNKMRVGAKAAVYVTAVLEYLTAEVLELAGNAAKDLKVKRITPRHLQLAIRGDEELDTLIRATIAFGGVLPHINRALLLKVEQKKKAKAQEA					NCU05347	hH2Az	H2AZ
