# Supplementary material for: Comparative Genomics of a Plant-Pathogenic Fungus, Pyrenophora tritici-repentis, Reveals Transduplication and the Impact of Repeat Elements on Pathogenicity and Population Divergence
Source: G3 (Bethesda). 2013 Jan 1;3(1):41–63. doi: 10.1534/g3.112.004044 (PMC3538342; doi:10.1534/g3.112.004044)
Supplement: Supporting Information [file supp_3.1.41_TableS11.xlsx]

## Sheet: TableS11
Table S11 Histone genes present in Puccinia graminis
Translation	Supercontig	Start	Stop	Strand	Locus	Gene	Name	Comments
MSGRGKSGGKGLGKGGAKRHRKILRDNIQGITKPAIRRLARRGGVKRISGLIYEETRGVLKIFLENVIRDSVTYTEHAKRKTVTSLDVVYALKRQGRTLYGFGA*	supercont2.17	665000	665523	+	PGTG_06941.4	histone	H4	unusual, six copies of identical H4, four in cluster with H3
MSGRGKSGGKGLGKGGAKRHRKILRDNIQGITKPAIRRLARRGGVKRISGLIYEETRGVLKIFLENVIRDSVTYTEHAKRKTVTSLDVVYALKRQGRTLYGFGA*	supercont2.15	783539	784627	+	PGTG_06666.4	histone	H4
MSGRGKSGGKGLGKGGAKRHRKILRDNIQGITKPAIRRLARRGGVKRISGLIYEETRGVLKIFLENVIRDSVTYTEHAKRKTVTSLDVVYALKRQGRTLYGFGA*	supercont2.15	571982	573155	+	PGTG_06606.4	histone	H4
MSGRGKSGGKGLGKGGAKRHRKILRDNIQGITKPAIRRLARRGGVKRISGLIYEETRGVLKIFLENVIRDSVTYTEHAKRKTVTSLDVVYALKRQGRTLYGFGA*	supercont2.2	1984317	1985202	-	PGTG_01861.4	histone	H4
MSGRGKSGGKGLGKGGAKRHRKILRDNIQGITKPAIRRLARRGGVKRISGLIYEETRGVLKIFLENVIRDSVTYTEHAKRKTVTSLDVVYALKRQGRTLYGFGA*	supercont2.1	1662151	1662597	-	PGTG_00392.4	histone	H4
MSGRGKSGGKGLGKGGAKRHRKILRDNIQGITKPAIRRLARRGGVKRISGLIYEETRGVLKIFLENVIRDSVTYTEHAKRKTVTSLDVVYALKRQGRTLYGFGA*	supercont2.17	659944	661117	-	PGTG_06937.4	histone	H4
MSGGKGGKAGGEKAASQSRSSKAGLQFPVGRIHRLLRKGNYAQRVGAGAPVYLAAVLEYLAAEILELAGNAARDNKKSRIIPRHLQLAIRNDEELNKLLGHCVISQGGVIPQIHSELLPAKSKDKASKVSQEV*	supercont2.72	317268	317967	+	PGTG_16084.4	histone	H2A	two identical H2A
MSGGKGGKAGGEKAASQSRSSKAGLQFPVGRIHRLLRKGNYAQRVGAGAPVYLAAVLEYLAAEILELAGNAARDNKKSRIIPRHLQLAIRNDEELNKLLGHCVISQGGVIPQIHSELLPAKSKDKASKVSQEV*	supercont2.72	357851	358784	-	PGTG_16093.4	histone	H2A
MSQEYINTLPFNRRPSHLQAQPPTQTNLTSQPTNQTHPTQKPTHTTMSGGKGGKAGGEKAASQSRSSKAGLQFPVGRIHRLLRKGNYAQRVGAGAPVYLAAVLEYLAAEILELAGNAARDNKKSRIIPRHLQLAIRNDEELNKLLGHCVISQGGVIPQIHSELLPAKSKDKASKVSQEV*	supercont2.35	195214	196143	-	PGTG_10973.4	histone	H2A
MPPKSTTAEKKPASTASKAPASKVASEPKAEKSTKPADGEKKKKRTKRKETYGIYIYKVLKQVHPDTGISNKAMLIMNSFVNDIFERIATEASKLAMYNKKSTISSREIQTAVRLILPGELSKHAISEGTKGVTKYTSSK*	supercont2.22	680734	681912	-	PGTG_08915.4	histone	H2B	two different H2B
MPPKSTTAEKKPASTASKAPASKATSSAAPADKKTAKKSTKPVDGEKKKRKKKRNETYGIYIYKVLKQVHPDTGISNKAMLIMNSFVNDIFERIATEASKLALYNKKSTISSREIQTAVRLILPGELSKHAISEGTKGVTKYTSSK*	supercont2.3	2323504	2324313	+	PGTG_01301.4	histone	H2B
MLILNSFVNNIFERIATEASKSAPYNKKTTISSREIQTAVRLILPGELSKHAISEGTSRV*	supercont2.7	1374217	1374566	-	PGTG_03754.4	histone	?	partial H2B
MSGGKPVTGPALEPAQHYIQKGGRLKSQLSQTSASANTYPSPARVTHRSTSIPTPVNIHPDCRQPRPSLTTDSSTVFLGGIESTGSLAETLPRQAYLVSLFQDTNLAAIHAKHVTIQPKDIQLARRLRGGTESSGSRTPRCQPRPSLRTDSSAVFSGGFESSSSRTETSPRRTPRRQPRPSLTTDSSAVSAPKPSQLVWWAK*	supercont2.1	2267410	2268168	-	PGTG_00542.4	histone	?	similar to H3
MARTKQTARKSTGGKAPRKQLAAKAARKSAPATGGVKKPHRYKPGTVALREIRRYQKSTELLIRKLPFQRLVREIAQDFKTDLRFQSSAIGALQESAEAYLVSLFEDTNLAAIHAKRVTIQPKDIQLARRLRGERS*	supercont2.32	603980	606295	+	PGTG_11296.4	histone	H3
MARTKQTARKSTGGKAPRKQLAAKAARKSAPPAGGVKKPHRYRPGTVALREIRRYQKSTELLIRKLPFQRLVREIAQDFKTDLRFQSSAVMALQESAEAYLVGLFEDTNLAAIHAKRVTIQPKDIQLARRLRGERS*	supercont2.12	1384994	1385989	-	PGTG_06100.4	histone	H3L	unusual, six additional, non-identical copies of H3
MARTKQTARKSTGGKAPRKQLAAKSARKSAPTTGGVKKPHRYRPGTVALREIRRYQKSTELLIRKLPFQRLVREIAQDFKTDLRFQSSAVMALQESAEAYLVGLFEDTNLAAIHAKRVTIQPKDIQLARRLRGERS*	supercont2.17	663483	664598	-	PGTG_06940.4	histone	H3L
MARTKQTARKSTGGKAPRKQLAAKAARKSAPSTGGVKKPHRYRPGTVALREIRRYQKSTELLIRKLPFQRLVREIAQDFKTDLRFQSSAVMALQESAEAYLVGLFEDTNLAAIHAKRVTIQPKDIQLARRLRGERS*	supercont2.1	1663140	1663825	+	PGTG_00393.4	histone	H3L
MARTKQTARKSTGGKAPRKQLAAKAARKSAPPAGGVKKPHRYRPGTVALREIRRYQKSTELLIRKLPFQRLVREIAQDFKTDLRFQSSAVMALQESAEAYLVGLFEDTNLAAIHAKRVTIQPKDIQLARRLRGERS*	supercont2.35	342636	343905	+	PGTG_11010.4	histone	H3L
MARTKQTARKSTGGKAPRKQLAAKSARKSAPTTGGVKKPHRYRPGTVALREIRRYQKSTELLIRKLPFQRLVREIAQDFKTDLRFQSSAVMALQESAEAYLVGLFEDTNLAAIHAKRVTIQPKDIQLARRLRGERS*	supercont2.17	661452	662461	+	PGTG_06938.4	histone	H3L
MARTKQTARKSTGGKAPRKQLAAKAARKSAPSSVTAGVKKPHRYRPGTVALREIRRYQKSTELLIRKLPFQRLVREIAQDFKTDLRFQSSAVMALQESAEAYLVGLFEDTNLAAIHAKRVTIQPKDIQLARRLRGERS*	supercont2.2	1985249	1986351	+	PGTG_01862.4	hH3	H3L
MAVGANKTSNQRPDKSPTNPVSKTGTKPLKKPRKSVEKKRTSDAASASKSKKPHRYRPGTVALREIRHYQKSTDLLMRKLPFARLVREIAMDYALATDDGAALRWQSSALLALQEAAEAYLVHIFEDTNLCAIHAKRVTIMKRDMELARRLRGGPWASEVI*	supercont2.3	2326598	2327896	-	PGTG_01303.4	hH3v	CenH3/CenpA
MTLREFLWPKKDNYAQRVGAGAPVYLAAVLEYLAAEILELAGNAAWDNKKSRIIPLLAQDKSLPCAVGFSQKSAADIRSQNKGVGVDNVHWLGNDLWLIDEI*	supercont2.86	35382	35810	-	PGTG_22488.4		H2?
MGKAKEKFRRGETFLEALRKVLERCWRSCGEQVLVYWLNFRLKTAGTGPKQGVHPDCAFLVFNDLDDIPCLTPEIAEALKDLLATVALEQFPPCANLAAYHAKQVTIQPKDIQLTQQLRGKHS*	supercont2.30	844032	845341	-	PGTG_10909.4		H3?
