# Supplementary material for: Comparative Genomics of a Plant-Pathogenic Fungus, Pyrenophora tritici-repentis, Reveals Transduplication and the Impact of Repeat Elements on Pathogenicity and Population Divergence
Source: G3 (Bethesda). 2013 Jan 1;3(1):41–63. doi: 10.1534/g3.112.004044 (PMC3538342; doi:10.1534/g3.112.004044)
Supplement: Supporting Information [file supp_3.1.41_TableS14.xlsx]

## Sheet: TableS14
Table S14 Predicted secretome of P. tritici-repentis
Locus	Broad annotation	Size (aa)	% Cys	1 TM predicteda	HMMb	E-valueb	Present in DW7c	Present in SD20c	GO:Biological Processesd	GO:Molecular Functiond	Hit descriptiond	ESTs
												BFP-ToxA/C in plantae	BFP-ToxA/C culture	SD20-NP culture	SO3-P culture
Small Secreted Proteins
PTRG_00051	predicted protein	159	6.96		Hydrophobin_2	4.4e-26	yes	yes	capsule organization
									cell communication
									hyphal growth
PTRG_00123	conserved hypothetical protein	165	6.1		CFEM	5.1e-11	yes	yes
PTRG_00143	mitochondrial import inner membrane translocase subunit tim14	105	0	yes	DnaJ	1.1e-07	yes	yes	transmembrane transport	heat shock protein binding	mitochondrial chaperone		2	3	4
									protein transport
PTRG_00187	secretory phospholipase A2	155	3.25	yes	Phospholip_A2_3	7.9e-42	yes	yes				2
PTRG_00203	hypothetical protein	159	3.8				yes	yes		catalytic activity	class v		2		2
PTRG_00260	predicted protein	189	2.13		LysM	9.9e-08	yes	yes	cell wall macromolecule catabolic process
PTRG_00384	predicted protein	63	1.61				yes	yes
PTRG_00478	predicted protein	133	3.03				yes	yes
PTRG_00479	predicted protein	129	5.47				yes	yes
PTRG_00519	conserved hypothetical protein	98	8.25				yes	yes
PTRG_00522	predicted protein	200	0.5				yes	yes							2
PTRG_00529	predicted protein	52	0				yes	yes
PTRG_00558	hypothetical protein	80	10.13				yes	yes				2
PTRG_00631	hypothetical protein	118	2.56				yes	yes					4		8
PTRG_00723	predicted protein	184	0.55				yes	yes
PTRG_00758	predicted protein	75	4.05				yes	yes
PTRG_00883	conserved hypothetical protein	158	1.27	yes	MAPEG	1.3e-12	yes	yes
PTRG_00917	conserved hypothetical protein	164	4.91				yes	yes					2	2	2
PTRG_00927	conserved hypothetical protein	191	1.58		Tyrosinase	6e-09	yes	yes	metabolic process	oxidoreductase activity	tyrosinase central domain protein
					Tyrosinase	1.3e-12	yes	yes
PTRG_00935	predicted protein	54	9.43				yes	yes
PTRG_00948	conserved hypothetical protein	184	0		DUF1034	0.065	yes	yes					2	5
PTRG_00976	hypothetical protein	124	0	yes	DUF2015	4.6e-47	yes	yes					2	3	2
PTRG_01032	predicted protein	146	4.14				yes	yes				2
PTRG_01049	hypothetical protein	148	2.72				yes	yes					8		2
PTRG_01117	predicted protein	75	1.35				yes	yes
PTRG_01132	predicted protein	87	2.33				yes	yes
PTRG_01191	predicted protein	146	4.14		LysM	0.0014	yes	yes	cell wall macromolecule catabolic process
PTRG_01240	hypothetical protein	175	4.6				yes	yes					2		4
PTRG_01339	hypothetical protein	130	0				yes	yes						3	10
PTRG_01354	hypothetical protein	131	1.54				yes	yes					2	8	9
PTRG_01371	hypothetical protein	54	11.32				yes	yes				2			3
PTRG_01437	hypothetical protein	178	0.56				no	no					4
PTRG_01463	conserved hypothetical protein	101	3				yes	yes
PTRG_01469	predicted protein	90	8.99		Hydrophobin_2	1.8e-14	yes	yes	cell communication
PTRG_01538	conserved hypothetical protein	175	5.75				yes	yes					4
PTRG_01617	predicted protein	59	0				yes	yes
PTRG_01647	predicted protein	112	2.7				yes	yes
PTRG_01675	predicted protein	55	3.7				yes	yes
PTRG_01768	predicted protein	104	1.94	yes	PA-IL	0.052	yes	yes
PTRG_01781	conserved hypothetical protein	109	0	yes	DUF2133	0.049	yes	yes					9	2	16
PTRG_01803	conserved hypothetical protein	188	5.35		Bys1	1.5e-14	yes	yes	oxidation reduction	catalase activity	bys1 domain		8	1	10
									response to oxidative stress
PTRG_01823	predicted protein	133	6.06				yes	yes
PTRG_01853	hypothetical protein	108	5.61				yes	yes					8
PTRG_01890	predicted protein	50	4.08				yes	yes
PTRG_01923	predicted protein	78	7.79				yes	yes
PTRG_02034	predicted protein	128	3.94				yes	yes
PTRG_02151	conserved hypothetical protein	96	8.42		Hydrophobin_2	2.9e-22	yes	yes	hyphal growth
									capsule organization
									cell communication
									interaction with host via protein secreted by type II secretion system
PTRG_02202	predicted protein	90	2.25	yes			yes	yes
PTRG_02218	predicted protein	92	3.3				yes	yes
PTRG_02241	predicted protein	99	6.12				yes	yes
PTRG_02320	predicted protein	122	3.31		Neuralized	0.048	yes	yes
PTRG_02321	hypothetical protein	172	2.34				yes	yes	response to cAMP					4
									developmental maturation
PTRG_02456	predicted protein	90	1.12				yes	yes
PTRG_02515	hypothetical protein	136	2.96				yes	yes				2	4
PTRG_02537	hypothetical protein	192	3.66				yes	yes					2
PTRG_02606	predicted protein	91	5.56		PRA1	0.098	yes	yes
					Innexin	0.036
PTRG_02669	conserved hypothetical protein	157	1.28	yes	Bys1	0.0012	yes	yes
PTRG_02693	hypothetical protein	121	6.67				yes	yes					4	4	4
PTRG_02758	predicted protein	180	6.7				yes	yes
PTRG_02859	conserved hypothetical protein	163	0				yes	yes
PTRG_02982	predicted protein	76	10.67				yes	yes
PTRG_03030	predicted protein	106	0.95	yes			yes	yes
PTRG_03069	conserved hypothetical protein	154	3.92				yes	yes					11	6	2
PTRG_03078	predicted protein	105	0	yes			yes	yes
PTRG_03079	conserved hypothetical protein	167	4.82				yes	yes					8		2
PTRG_03107	predicted protein	139	2.9				yes	yes
PTRG_03151	predicted protein	69	1.47				yes	yes
PTRG_03154	predicted protein	145	0.69				yes	yes
PTRG_03171	conserved hypothetical protein	179	4.49				yes	yes						2	4
PTRG_03183	hypothetical protein	50	4.08	yes			yes	yes				1	2
PTRG_03260	hypothetical protein	197	2.04				yes	yes					1	3
PTRG_03269	peptidyl-tRNA hydrolase domain containing protein	200	1.01		RF-1	1.7e-08	yes	yes	translational termination	hydrolase activity	peptidyl-trna hydrolase domain-containing protein
										translation release factor activity
PTRG_03423	predicted protein	165	3.66				yes	yes
PTRG_03424	predicted protein	129	6.25				yes	yes
PTRG_03447	predicted protein	65	0				yes	yes
PTRG_03460	predicted protein	79	2.56				yes	yes
PTRG_03516	conserved hypothetical protein	132	2.29				yes	yes						2
PTRG_03541	hypothetical protein	196	4.1				yes	yes					10	2	10
PTRG_03545	predicted protein	92	6.59	yes			yes	yes
PTRG_03567	hypothetical protein	199	2.53				yes	yes					2		4
PTRG_03593	conserved hypothetical protein	98	1.03	yes	Inhibitor_I9	0.016	yes	yes					4	2	6
PTRG_03636	predicted protein	186	2.16				yes	yes
PTRG_03740	predicted protein	137	0.74	yes			yes	yes
PTRG_03776	predicted protein	135	1.49				yes	yes
PTRG_03833	predicted protein	155	6.49	yes			yes	yes
PTRG_03899	conserved hypothetical protein	73	2.78	yes	DUF1242	6.3e-16	yes	yes		methyltransferase activity	s-adenosylmethionine-dependent methyltransferase		2	1	1
PTRG_03972	predicted protein	117	3.45				yes	yes
PTRG_03992	predicted protein	86	7.06		MSG	0.065	yes	yes
PTRG_03992	predicted protein	86	7.06		Antifungal_prot	7e-11	yes	yes
PTRG_04038	hypothetical protein	145	2.78				yes	yes							4
PTRG_04061	predicted protein	95	7.45				yes	yes
PTRG_04062	predicted protein	86	4.71				yes	yes
PTRG_04111	stress responsive A/B barrel domain containing protein	156	0.65	yes	Dabb	3.3e-22	yes	yes							2
PTRG_04130	hypothetical protein	122	1.65				yes	yes							2
PTRG_04149	predicted protein	99	0				yes	yes
PTRG_04176	hypothetical protein	171	2.35				yes	yes					4	2	4
PTRG_04213	conserved hypothetical protein	171	4.71		MGC-24	0.034	yes	yes					10	2	6
PTRG_04250	hypothetical protein	170	0		Ribosomal_S4e	0.00016	yes	yes					12	4	19
					DUF3237	1.5e-14
PTRG_04344	predicted protein	121	0.83				yes	yes
PTRG_04416	conserved hypothetical protein	193	3.13				yes	yes
PTRG_04438	predicted protein	132	3.05				yes	yes
PTRG_04467	predicted protein	75	1.35				yes	yes
PTRG_04476	predicted protein	130	3.88				yes	yes
PTRG_04489	predicted protein	137	3.68				yes	yes
PTRG_04493	hypothetical protein	195	0.52	yes			yes	yes							2
PTRG_04511	predicted protein	57	5.36				yes	yes
PTRG_04567	hypothetical protein	113	6.25		Meleagrin	0.089	yes	yes						2	2
					Peptidase_M19	0.076
PTRG_04572	hypothetical protein	116	3.48				yes	yes					16	4	4
PTRG_04595	predicted protein	127	3.97				yes	yes
PTRG_04617	conserved hypothetical protein	174	1.16				yes	yes							2
PTRG_04645	predicted protein	109	3.7	yes			yes	yes
PTRG_04654	hypothetical protein	200	2.01				yes	yes
PTRG_04662	conserved hypothetical protein	190	0.53				yes	yes	response to cAMP
PTRG_04677	predicted protein	138	4.38	yes			yes	yes
PTRG_04678	conserved hypothetical protein	127	6.35				yes	yes					12
PTRG_04704	predicted protein	91	11.11				yes	yes
PTRG_04748	predicted protein	70	5.8				yes	yes
PTRG_04835	hypothetical protein	99	8.16				yes	yes						2
PTRG_04850	conserved hypothetical protein	163	2.47				yes	yes				2	8	8	3
PTRG_04863	predicted protein	155	7.79				yes	yes
PTRG_04870	predicted protein	73	9.72				yes	yes
PTRG_04889	host-selective toxin	115	0.88		Toxin_ToxA	1.5e-77	no	no				8	10
PTRG_04901	predicted protein	165	1.83	yes			no	no
PTRG_04919	predicted protein	123	0.82				no	no
PTRG_04970	predicted protein	73	2.78				yes	yes
PTRG_04979	conserved hypothetical protein	178	2.82				yes	yes					6	2	10
PTRG_05012	hypothetical protein	118	5.98				yes	yes					2
PTRG_05019	predicted protein	142	0	yes			yes	yes
PTRG_05020	hypothetical protein	85	0		GRP	0.0022	yes	yes							2
PTRG_05021	predicted protein	143	1.41				yes	yes
PTRG_05037	predicted protein	130	1.55				yes	yes
PTRG_05067	predicted protein	109	3.7				yes	yes
PTRG_05069	predicted protein	95	6.38				yes	yes
PTRG_05095	predicted protein	95	6.38		DIM	0.057	yes	yes					1
PTRG_05127	predicted protein	95	6.38				yes	yes
PTRG_05151	conserved hypothetical protein	107	5.66				yes	yes					10		5
PTRG_05187	hypothetical protein	141	0	yes			yes	yes					8		2
PTRG_05203	hypothetical protein	130	0.78				yes	yes							2
PTRG_05283	conserved hypothetical protein	191	0.53		HsbA	2e-25	yes	yes
PTRG_05284	predicted protein	159	6.33		DivIC	0.069	yes	yes
PTRG_05296	predicted protein	118	0.85				no	no
PTRG_05311	predicted protein	130	0	yes			yes	yes
PTRG_05333	predicted protein	90	8.99				yes	yes
PTRG_05392	predicted protein	96	3.16				yes	yes
PTRG_05421	predicted protein	176	4.57		LysM	0.00081	yes	yes	cell wall macromolecule catabolic process
					Glyco_transf_8	0.092
					LysM	0.068
PTRG_05427	predicted protein	81	1.25		DEC-1_N	0.0014	yes	yes
PTRG_05427	predicted protein	81	1.25		PLRV_ORF5	0.048	yes	yes
PTRG_05451	predicted protein	86	7.06				yes	yes
PTRG_05479	conserved hypothetical protein	177	1.14				yes	yes
PTRG_05511	predicted protein	197	2.04		ISAV_HA	0.044	yes	yes
PTRG_05531	guanyl-specific ribonuclease Pb1	137	2.94		Ribonuclease	3.1e-20	yes	yes		endoribonuclease activity	extracellular guanyl-specific ribonuclease
										RNA binding
										ribonuclease T1 activity
PTRG_05545	hypothetical protein	167	4.22				yes	yes					1
PTRG_05562	hypothetical protein	157	1.92				yes	yes							2
PTRG_05580	hypothetical protein	136	0		Med3	0.035	yes	yes					2
PTRG_05657	conserved hypothetical protein	193	3.65				yes	yes
PTRG_05658	predicted protein	110	7.34				yes	yes
PTRG_05750	conserved hypothetical protein	199	0.51		DUF3237	5.4e-30	yes	yes				2		2
PTRG_05810	predicted protein	68	4.48				yes	yes
PTRG_05823	hypothetical protein	131	3.08				yes	yes						2	1
PTRG_05858	predicted protein	77	0				yes	yes
PTRG_05885	conserved hypothetical protein	131	5.38				yes	yes					10	9	6
PTRG_05999	predicted protein	77	2.63				yes	yes
PTRG_06004	hypothetical protein	159	0		DUF3325	0.076	yes	yes					10		4
PTRG_06015	predicted protein	56	1.82	yes			yes	yes
PTRG_06042	predicted protein	119	3.39				yes	yes
PTRG_06044	predicted protein	80	10.13				yes	yes
PTRG_06110	conserved hypothetical protein	193	1.56		DUF2938	0.058	yes	yes					12	6
					DUF883	0.00068
					Ifi-6-16	2.2e-05
PTRG_06220	predicted protein	186	1.62		SnoaL_2	0.0023	no	no/diverged
PTRG_06231	predicted protein	131	3.08				yes	yes
PTRG_06295	hypothetical protein	57	0				yes	yes					2
PTRG_06426	predicted protein	163	1.85				yes	yes
PTRG_06429	predicted protein	140	6.47				yes	yes				2
PTRG_06517	predicted protein	104	7.77				yes	yes
PTRG_06556	predicted protein	94	3.23				yes	yes
PTRG_06557	hypothetical protein	52	1.96	yes			yes	yes							2
PTRG_06608	predicted protein	53	1.92				yes	yes
PTRG_06617	predicted protein	170	2.37				yes	yes
PTRG_06656	predicted protein	109	5.56		Gamma-thionin	0.031	yes	yes
PTRG_06732	translation initiation inhibitor	143	0		Ribonuc_L-PSP	6.6e-28	yes	yes	cellular nitrogen compound biosynthetic process
					GSDH	0.051
PTRG_06742	predicted protein	135	0				yes	yes					2
PTRG_06777	hypothetical protein	49	0	yes	UNC-50	0.011	yes	yes						1	2
					DUF2516	0.07
					PsbN	0.055
					DUF3139	0.042
					Chordopox_A13L	0.012
PTRG_06790	hypothetical protein	152	2.65		RALF	2.6e-18	yes	yes	cell-cell signaling	signal transducer activity	protein ralf-like 33		4
					DIM	0.021			cell-cell signaling
PTRG_06815	predicted protein	170	1.18				yes	yes							1
PTRG_06853	predicted protein	122	1.65				yes	no
PTRG_06924	predicted protein	161	3.75				yes	yes
PTRG_06926	FK506-binding protein 2 precursor	130	1.55		FKBP_C	7.8e-32	yes	yes	protein folding	peptidyl-prolyl cis-trans isomerase activity	fkbp-type peptidyl-prolyl	4	7	4	15
PTRG_06976	hypothetical protein	132	5.34				yes	yes					2
PTRG_07001	predicted protein	69	8.82				yes	yes
PTRG_07059	predicted protein	122	6.61				yes	yes
PTRG_07067	predicted protein	78	3.9		NPP1	0.068	yes	yes
PTRG_07203	predicted protein	112	1.8				yes	yes
PTRG_07271	predicted protein	88	5.75				yes	yes
PTRG_07382	conserved hypothetical protein	199	0.51		adh_short	0.038	yes	yes	metabolic process	binding	short-chain dehydrogenases			2
										oxidoreductase activity
PTRG_07397	hypothetical protein	187	3.23	yes			yes	yes				2			2
PTRG_07417	predicted protein	108	9.35		P12	0.032	yes	yes
PTRG_07466	hypothetical protein	158	2.55				yes	yes						1	4
PTRG_07510	predicted protein	74	1.37				yes	yes
PTRG_07515	predicted protein	128	7.09				yes	yes
PTRG_07524	predicted protein	149	1.35				yes	yes
PTRG_07580	hypothetical protein	168	0		PIR	4.6e-06	yes	yes				2	10	6	4
PTRG_07597	hypothetical protein	64	0	yes	Yos1	2.1e-16	yes	yes	intracellular protein transport				6	2	2
PTRG_07597	hypothetical protein	64	0		Yos1	2.1e-16	yes	yes	ER to Golgi vesicle-mediated transport				6	2	2
PTRG_07635	conserved hypothetical protein	136	1.48	yes			yes	yes					8	6	11
PTRG_07660	conserved hypothetical protein	189	4.26				yes	yes					2
PTRG_07715	hypothetical protein	138	1.46				yes	yes					12	15	16
PTRG_07761	hypothetical protein	103	0	yes	YajC	0.081	yes	yes					10	2	2
					Fork_head_N
PTRG_07859	predicted protein	86	9.41				yes	yes
PTRG_07920	conserved hypothetical protein	148	5.44				yes	yes
PTRG_07935	predicted protein	80	1.27		Peptidase_M66	0.0094	yes	yes
PTRG_07936	predicted protein	164	3.68				yes	yes
PTRG_08027	predicted protein	91	6.67				yes	yes
PTRG_08136	predicted protein	76	2.67		Mfp-3	0.032	yes	yes
PTRG_08137	hypothetical protein	148	2.72				yes	yes					6	2	12
PTRG_08138	hypothetical protein	118	5.13				yes	yes					2
PTRG_08159	hypothetical protein	157	2.56				yes	yes					2
PTRG_08247	hypothetical protein	51	2	yes			yes	yes						2
PTRG_08266	hypothetical protein	167	4.82		CFEM	8.1e-13	yes	yes				1	2
PTRG_08335	conserved hypothetical protein	173	1.16				yes	yes
PTRG_08379	hypothetical protein	69	2.94	yes			yes	yes					8	2
PTRG_08398	predicted protein	107	1.89				yes	yes
PTRG_08448	predicted protein	130	3.1				yes	yes
PTRG_08460	conserved hypothetical protein	188	0				yes	yes				2	5		1
PTRG_08470	hypothetical protein	73	11.11				yes	yes				2
PTRG_08572	hypothetical protein	87	16.28				yes	yes					2
PTRG_08636	predicted protein	60	0				yes	yes
PTRG_08813	hypothetical protein	140	6.47		tRNA-synt_1f	0.0096	yes	yes	regulation of transcription	zinc ion binding	dna-directed rna polymerase i polypeptide
					RNA_POL_M_15KD	4.5e-05				DNA-directed RNA polymerase activity
					TFIIS_C	1.1e-15				DNA binding
										transcription regulator activity
PTRG_09026	predicted protein	141	2.14				yes	yes					2
PTRG_09077	conserved hypothetical protein	190	1.06		But2	6.1e-41	yes	yes
PTRG_09091	conserved hypothetical protein	180	0				yes	yes	spore germination
PTRG_09109	predicted protein	92	6.59				yes	yes
PTRG_09139	hypothetical protein	105	3.85				yes	yes					6
PTRG_09155	predicted protein	164	2.45				yes	yes
PTRG_09282	hypothetical protein	97	8.33				yes	yes					29	20	26
PTRG_09308	conserved hypothetical protein	163	2.47				yes	yes
PTRG_09351	hypothetical protein	77	10.53				yes	yes							2
PTRG_09352	hypothetical protein	162	3.73		Ribonuclease	6.9e-05	yes	yes		endoribonuclease activity			7
										RNA binding
PTRG_09356	hypothetical protein	158	0				yes	yes					1	2
PTRG_09361	conserved hypothetical protein	200	1.01				yes	yes							2
PTRG_09372	conserved hypothetical protein	162	1.24	yes			yes	yes					4		1
PTRG_09380	hypothetical protein	96	7.37				yes	yes					2	1
PTRG_09431	predicted protein	73	4.17				no	yes
PTRG_09433	conserved hypothetical protein	125	6.45				yes	yes							2
PTRG_09454	conserved hypothetical protein	180	2.79		Ricin_B_lectin	4.6e-08	yes	yes
PTRG_09458	hypothetical protein	49	4.17				yes	yes					2
PTRG_09464	conserved hypothetical protein	130	4.65	yes	DUF2076	0.02	yes	yes
PTRG_09470	predicted protein	73	5.56				yes	yes
PTRG_09689	predicted protein	116	4.35	yes	Apt1	0.053	yes	yes
					zf-LITAF-like	0.048
					DUF1510	0.04
					DUF1183	0.00035
PTRG_09694	predicted protein	170	0		K-cyclin_vir_C	0.014
PTRG_09708	conserved hypothetical protein	159	1.9				yes	yes					10		1
PTRG_09958	predicted protein	97	6.25				yes	yes
PTRG_09964	predicted protein	198	0		Chorion_3	0.018	yes	yes
PTRG_09981	predicted protein	199	0	yes			yes	yes
PTRG_10036	predicted protein	54	1.89	yes			yes	yes
PTRG_10038	conserved hypothetical protein	121	0.83		Pcc1	3.5e-16	yes	yes
PTRG_10056	conserved hypothetical protein	186	0.54		DUF1993	1.2e-40	yes	yes					19	3	5
PTRG_10069	predicted protein	70	4.35				yes	yes
PTRG_10079	hypothetical protein	188	0.53				yes	yes					4
PTRG_10101	predicted protein	60	10.17	yes			yes	yes
PTRG_10109	hypothetical protein	153	0.66				yes	yes					8	2	2
PTRG_10111	hypothetical protein	126	3.2				yes	yes				2	10	5	5
PTRG_10127	hypothetical protein	119	2.54				yes	yes					2		4
PTRG_10138	predicted protein	130	0				yes	yes
PTRG_10147	hypothetical protein	55	7.41				yes	yes							4
PTRG_10184	predicted protein	176	0.57				yes	yes
PTRG_10228	hypothetical protein	63	0	yes			yes	yes						2
PTRG_10244	conserved hypothetical protein	188	2.14	yes	CHRD	0.00011	yes	yes
PTRG_10257	predicted protein	61	0				yes	yes					2	14	7
PTRG_10371	predicted protein	183	0				yes	yes
PTRG_10524	predicted protein	59	6.9	yes			no	no
PTRG_10528	conserved hypothetical protein	180	2.23				yes	yes				2	8	2	10
PTRG_10567	endo-1,4-beta-xylanase B precursor	121	1.67		Glyco_hydro_11	6.1e-15	yes	yes	xylan catabolic process	endo-1,4-beta-xylanase activity	endo- -beta-xylanase
PTRG_10611	hypothetical protein	83	9.76	yes			yes	yes					2
PTRG_10612	predicted protein	116	6.96				yes	yes
PTRG_10633	predicted protein	183	3.85				yes	yes
PTRG_10657	conserved hypothetical protein	172	1.75				yes	yes					6		6
PTRG_10746	conserved hypothetical protein	153	1.97				yes	yes
PTRG_10762	predicted protein	162	0				yes	yes
PTRG_10788	hypothetical protein	112	5.41				yes	yes							4
PTRG_10789	heat-stable 19 kDa antigen precursor	137	2.94		Cerato-platanin	3.1e-60	yes	yes	interaction with host via protein secreted by type II secretion system			*2	20	12	14
									pathogenesis
PTRG_10801	predicted protein	75	8.11				yes	yes
PTRG_10833	conserved hypothetical protein	200	5.03				yes	yes
PTRG_10835	predicted protein	122	6.61				yes	yes
PTRG_10847	conserved hypothetical protein	96	8.42		FAP	0.058	yes	yes						2
PTRG_10852	predicted protein	61	5				yes	yes
PTRG_10951	predicted protein	142	1.42				yes	yes
PTRG_10956	predicted protein	131	3.08		ATHILA	0.057	yes	yes
PTRG_10990	conserved hypothetical protein	123	3.28				yes	yes
PTRG_11014	conserved hypothetical protein	151	6.67		LRRNT_2	0.025	yes	yes
PTRG_11024	predicted protein	51	4				yes	yes
PTRG_11036	predicted protein	135	4.48				yes	yes
PTRG_11080	predicted protein	136	0.74				yes	yes
PTRG_11088	predicted protein	87	6.98				yes	yes
PTRG_11089	hypothetical protein	64	9.52	yes			yes	yes				3	6		2
PTRG_11126	phosphatidylglycerol/phosphatidylinositol transfer protein precursor	168	2.4		CopC	0.027	yes	yes	transport
					E1_DerP2_DerF2	3.2e-27			transport
PTRG_11157	predicted protein	124	4.88		PTS_EIIA_2	0.078	yes	yes
PTRG_11187	conserved hypothetical protein	96	3.16	yes			yes	yes							2
PTRG_11244	conserved hypothetical protein	121	5				yes	yes				1
PTRG_11261	predicted protein	70	5.8				yes	yes
PTRG_11346	hypothetical protein	93	8.7				yes	absent/diverged					3
PTRG_11351	predicted protein	94	0				yes	yes
PTRG_11361	predicted protein	122	4.96				yes	yes
PTRG_11364	conserved hypothetical protein	141	5.71		CFEM	4.9e-05	yes	yes					2	6	3
PTRG_11377	predicted protein	76	9.33				yes	yes
PTRG_11379	conserved hypothetical protein	168	2.4		DUF3047	0.07	yes	yes						2
PTRG_11383	hypothetical protein	141	2.86				yes	yes					4
PTRG_11416	hypothetical protein	60	1.69				yes	yes					2
PTRG_11417	predicted protein	65	4.69		PsaX	0.05	yes	yes
PTRG_11496	predicted protein	110	1.83				yes	yes
PTRG_11514	predicted protein	176	0				yes	yes
PTRG_11516	conserved hypothetical protein	200	0		Clat_adaptor_s	5.7e-14	yes	yes	transport				14		5
PTRG_11700	hypothetical protein	187	1.08				yes	yes					2
PTRG_11771	hypothetical protein	93	8.7				yes	yes					4		1
PTRG_11772	hypothetical protein	105	7.69				yes	no					4
PTRG_11773	hypothetical protein	93	10.87				yes	no				5	14		4
PTRG_11876	hypothetical protein	70	11.59				yes	yes					4		12
PTRG_11888	hypothetical protein	86	14.12				yes	no				8	7		4
PTRG_11992	predicted protein	145	2.78		Acyl_transf_1	4.7e-24	no	yes	biosynthetic process	transferase activity	polyketide synthase
										binding
PTRG_11995	hypothetical protein	145	6.94				yes	yes	interaction with host via protein secreted by type II secretion system				2
PTRG_12086	predicted protein	115	5.26	yes			yes	yes
PTRG_12117	hypothetical protein	192	2.09				yes	yes
PTRG_12138	hypothetical protein	73	9.72				yes	no				2	14
Secreted proteins > 200aa
PTRG_00001	predicted protein	479	1.67				yes	yes
PTRG_00006	hypothetical protein	209	1.92				yes	yes					2	6	2
PTRG_00007	conserved hypothetical protein	493	0.81		DUF1254	5.1e-16	yes	yes
					DUF1214	1e-24
PTRG_00008	glycosyl hydrolase family 43 protein	551	0.55		Glyco_hydro_43	2.9e-36	yes	yes	carbohydrate metabolic process	carbohydrate binding	xylosidase glycosyl
										hydrolase activity, hydrolyzing O-glycosyl compounds
PTRG_00010	conserved hypothetical protein	280	1.43				yes	yes	carbohydrate catabolic process	carbohydrate binding	cellobiose dehydrogenase
										catalytic activity
PTRG_00012	PAF acetylhydrolase family protein	382	1.05	yes	Abhydrolase_5	4.2e-12	yes	yes		hydrolase activity	paf acetylhydrolase family protein
PTRG_00052	chitin deacetylase	243	1.24		Polysacc_deac_1	1.3e-25	yes	yes	carbohydrate metabolic process	hydrolase activity, acting on carbon-nitrogen (but not peptide) bonds	chitin deacetylase
PTRG_00061	arabinogalactan endo-1,4-beta-galactosidase	229	0.88		Glyco_hydro_53	1.4e-72	yes	yes	cell wall macromolecule catabolic process	cation binding	arabinogalactan endo- -beta-galactosidase
									carbohydrate metabolic process	polysaccharide binding
										glucosidase activity
PTRG_00082	mannosyl-oligosaccharide 1,2-alpha-mannosidase precursor	518	0.77		Glyco_hydro_47	5.3e-134	yes	yes		mannosyl-oligosaccharide 1,2-alpha-mannosidase activity	mannosyl-oligosaccharide alpha- -mannosidase			2
										calcium ion binding				2
PTRG_00102	ligninase LG6 precursor	294	2.73		peroxidase	6.6e-30	yes	yes	oxidation reduction	heme binding	ligninase lg6 precursor				2
					DUF3415	1.8e-06			response to oxidative stress	peroxidase activity
PTRG_00103	endoglucanase B	535	1.87		CBM_1	1.3e-09	yes	yes	carbohydrate metabolic process	cellulose binding	endoglucanase b		1
					Glyco_hydro_61	1.1e-56				hydrolase activity, hydrolyzing O-glycosyl compounds
PTRG_00120	conserved hypothetical protein	568	1.23		Peptidase_S28	1.9e-05	yes	yes	proteolysis	serine-type peptidase activity	serine carboxypeptidase	2
					Peptidase_S28	5e-28
PTRG_00126	glutaminase A	807	0.62		DUF1793	2.4e-72	yes	yes		hydrolase activity	glutaminase a
PTRG_00176	isoflavone reductase family protein	320	1.25		NmrA	1.7e-16	yes	yes	metabolic process	binding	isoflavone reductase family protein
										catalytic activity
PTRG_00192	endoglucanase IV	264	1.52		Glyco_hydro_61	1.7e-60	yes	yes		hydrolase activity	endoglucanase iv				1
PTRG_00193	hypothetical protein	726	0.97				yes	yes
PTRG_00204	conserved hypothetical protein	236	2.55		But2	5.3e-17	yes	yes							2
PTRG_00205	C protein immunoglobulin-A-binding beta antigen	287	0.7				yes	yes				2	4	2	4
PTRG_00224	beta-glucosidase 2 precursor	720	0.97		Glyco_hydro_3	6.6e-74	yes	yes	carbohydrate metabolic process	beta-glucosidase activity	beta-glucosidase	*1
					Glyco_hydro_3_C	8e-31
PTRG_00282	predicted protein	318	0				yes	yes
PTRG_00284	polygalacturonase 1 precursor	368	2.72		Glyco_hydro_28	4.5e-97	yes	yes	cellular cell wall organization	polygalacturonase activity	polygalacturonase 1 precursor
									carbohydrate metabolic process
PTRG_00286	endochitinase 1 precursor	454	0.66		Glyco_hydro_18	2.9e-73	yes	yes	chitin catabolic process	cation binding	class v chitinase 1	*2	2
										chitinase activity
PTRG_00288	tripeptidyl-peptidase 1 precursor	582	1.03		Peptidase_S8	8e-10	yes	yes	proteolysis	serine-type endopeptidase activity	tripeptidyl-peptidase
					Pro-kuma_activ	2.2e-39
PTRG_00289	carboxypeptidase cpdS precursor	549	1.09		Peptidase_S10	7e-86	yes	yes	proteolysis	serine-type carboxypeptidase activity	carboxypeptidase cpds				2
PTRG_00300	carboxypeptidase A1 precursor	440	0.91		Peptidase_M14	2.8e-54	yes	yes	proteolysis	metallocarboxypeptidase activity	carboxypeptidase a1 precursor
										zinc ion binding
PTRG_00312	NADH-cytochrome b5 reductase 3	285	0.7	yes	NAD_binding_1	4.7e-26	yes	yes	oxidation reduction	cytochrome-b5 reductase activity	nadh-cytochrome b5 reductase		4	4	4
					FAD_binding_6	1.3e-28
PTRG_00321	predicted protein	229	3.51				yes	yes
PTRG_00346	predicted protein	296	3.05				yes	yes
PTRG_00376	carboxypeptidase A1 precursor	421	0.95		Propep_M14	3.6e-05	yes	yes	developmental maturation	metallocarboxypeptidase activity	carboxypeptidase a1
					Peptidase_M14	1.1e-74	yes	yes	proteolysis	zinc ion binding
PTRG_00386	predicted protein	298	1.68		DnaJ	1.9e-10	yes	yes		heat shock protein binding
PTRG_00400	conserved hypothetical protein	250	1.61				yes	yes						2	2
PTRG_00406	phosphorylcholine phosphatase	358	0.84		HAD	1.1e-08	yes	yes
PTRG_00474	chitinase	919	5.01		Glyco_hydro_18	1e-17	yes	yes	carbohydrate metabolic process	chitin binding	class v chitinase
									macromolecule metabolic process	hydrolase activity, hydrolyzing O-glycosyl compounds
										cation binding
PTRG_00493	predicted protein	390	1.29				yes	yes
PTRG_00517	pectin lyase A precursor	386	2.08		Pec_lyase_C	1.8e-20	yes	yes		lyase activity	pectin lyase a precursor
PTRG_00540	acetylesterase	259	0		Lipase_GDSL	1.1e-11	yes	yes	lipid metabolic process	hydrolase activity, acting on ester bonds	gdsl-like lipase acylhydrolase
PTRG_00571	endopolyphosphatase	763	0.66		PDEase_I_N	0.087	yes	yes		endopolyphosphatase activity	ppn1p-related protein		2
					Metallophos	7.6e-08
PTRG_00611	Poly (3-hydroxybutyrate) depolymerase	318	2.21		Esterase_phd	6.5e-06	yes	yes					2	2	5
PTRG_00621	hypothetical protein	974	0.82		Sad1_UNC	2.5e-35	yes	yes	metabolic process	oxidoreductase activity, acting on the CH-CH group of donors	sad1 unc domain protein
PTRG_00626	conserved hypothetical protein	502	1.4				yes	yes
PTRG_00632	conserved hypothetical protein	662	0.76				yes	yes
PTRG_00647	peptidase	895	0.78		DUF1034	1.2e-12	yes	yes	proteolysis	serine-type endopeptidase activity	subtilisin-like serine protease pr1c		4		4
					Peptidase_S8	5.9e-44			mycelium development
					PA	0.0019
PTRG_00654	conserved hypothetical protein	296	1.36		SET	4e-06	yes	yes		binding	conserved hypothetical protein [Pyrenophora tritici-repentis Pt-1C-BFP]
PTRG_00670	conserved hypothetical protein	354	0	yes			yes	yes					2	2	2
PTRG_00673	conserved hypothetical protein	401	2.5		CBM_19	0.011	yes	yes
					Chitin_bind_3	0.001
PTRG_00688	HET domain containing protein HetC	789	0.89	yes	Het-C	6.2e-254	yes	yes					4	2	2
PTRG_00698	acid phosphatase precursor	430	1.4		Phosphoesterase	8.6e-17	yes	yes		hydrolase activity, acting on ester bonds	acid phosphatase
PTRG_00700	alpha-L-arabinofuranosidase precursor	442	1.13		Glyco_hydro_62	6.7e-143	yes	yes	L-arabinose metabolic process	alpha-N-arabinofuranosidase activity	cellulose-binding family ii
									xylan catabolic process
PTRG_00708	pectate lyase	259	3.88	yes	Pectate_lyase	4.1e-65	yes	yes		pectate lyase activity	pectate lyase
PTRG_00711	laccase-1 precursor	600	1.34		Cu-oxidase	8.2e-33	yes	yes	oxidation reduction	oxidoreductase activity	laccase-1 precursor		4	7	2
					Cu-oxidase_2	3.2e-38	yes	yes	oxidation reduction	copper ion binding
					Cu-oxidase_3	1e-40	yes	yes	oxidation reduction	oxidoreductase activity
PTRG_00712	hypothetical protein	407	1.72				yes	yes					6	12
PTRG_00730	isoamyl alcohol oxidase	594	1.85		BBE	5.2e-14	yes	yes		oxidoreductase activity	isoamyl alcohol oxidase		2		2
					FAD_binding_4	5.9e-19				FAD binding
PTRG_00734	3-ketodihydrosphingosine reductase , Tsc10	370	0.27	yes	adh_short	1.1e-20	yes	yes	oxidation reduction	binding	3-ketosphinganine reductase				2
										oxidoreductase activity
PTRG_00739	beta-galactosidase precursor	1011	0.4		BetaGal_dom2	4.2e-54	yes	yes	carbohydrate metabolic process	beta-galactosidase activity	beta-galactosidase precursor
					Glyco_hydro_35	1.8e-87				cation binding
PTRG_00744	small glutamine-rich tetratricopeptide repeat-containing protein A	376	0.27		XPC-binding	0.016	yes	yes		binding	hsc70 cochaperone
					TPR_1	0.00012
					TPR_1	0.0001
PTRG_00785	conserved hypothetical protein	268	5.62				yes	yes
PTRG_00787	cytosolic Cu/Zn superoxide dismutase	246	1.63		Sod_Cu	2e-14	yes	yes	superoxide metabolic process	metal ion binding	cu-zn superoxide dismutase			2
									oxidation reduction	superoxide dismutase activity
PTRG_00851	major royal jelly protein	435	1.38		MRJP	9.9e-17	yes	yes
PTRG_00857	hypothetical protein	321	1.25				yes	yes	oxidation reduction	oxidoreductase activity	related to stress response protein rds1p
										transition metal ion binding
PTRG_00875	conserved hypothetical protein	484	1.24		SNDH	0.0082	yes	yes		catalytic activity	l-sorbosone dehydrogenase
					SGL	0.00017
PTRG_00881	fumarylacetoacetate hydrolase FahA	436	1.38		DUF1969	5.6e-26	yes	yes	aromatic amino acid family metabolic process	fumarylacetoacetase activity	fumarylacetoacetate hydrolase			4
					FAA_hydrolase	3.7e-48
PTRG_00887	NAD binding domain of 6-phosphogluconate dehydrogenase	337	0.6		NAD_binding_2	8.3e-20	yes	yes	pentose-phosphate shunt	phosphogluconate dehydrogenase (decarboxylating) activity	nad binding domain of 6-phosphogluconate dehydrogenase		2		2
									oxidation reduction	coenzyme binding
PTRG_00900	glucan 1,3-beta-glucosidase precursor	306	1.64		Glyco_hydro_17	6.8e-16	yes	yes	carbohydrate metabolic process	hydrolase activity, hydrolyzing O-glycosyl compounds	glucan -beta-glucosidase		8		10
PTRG_00916	hypothetical protein	568	0.71		Glyco_hydro_88	1.3e-59	yes	yes		catalytic activity	cell wall glycosyl hydrolase		2
PTRG_00919	hypothetical protein	604	0.5		GMC_oxred_C	7.3e-22	yes	yes	alcohol metabolic process	FAD binding	choline dehydrogenase
					GMC_oxred_N	8.3e-46				oxidoreductase activity, acting on CH-OH group of donors
PTRG_00921	conserved hypothetical protein	473	1.69		FAD_binding_3	1.4e-07	yes	yes	oxidation reduction	monooxygenase activity	protoporphyrinogen oxidase		2
PTRG_00929	GPI anchored CFEM domain containing protein	202	3.98		CFEM	9.2e-15	yes	yes							4
PTRG_00944	agmatinase, mitochondrial precursor	398	0.5		Arginase	1.3e-89	yes	yes	polyamine biosynthetic process	metal ion binding	mitochondrial precursor	2			2
										agmatinase activity
PTRG_00961	conserved hypothetical protein	308	1.63		adh_short	1.1e-23	yes	yes	oxidation reduction	oxidoreductase activity	short chain dehydrogenase reductase
										binding
PTRG_00985	conserved hypothetical protein	255	1.18		Peroxidase_2	2.5e-39	yes	yes		peroxidase activity	conserved hypothetical protein [Pyrenophora tritici-repentis Pt-1C-BFP]
PTRG_00989	conserved hypothetical protein	400	1				yes	yes
PTRG_01018	beta-xylosidase	555	0.72		Glyco_hydro_43	4.3e-37	yes	yes	carbohydrate metabolic process	hydrolase activity, hydrolyzing O-glycosyl compounds	xylosidase : arabinofuranosidase
PTRG_01020	ankyrin repeat domain containing protein	588	0.85		Ank	0.00017	yes	yes	nucleoside metabolic process	RNA-directed DNA polymerase activity	ankyrin repeat domain containing protein
					Ank	4.3e-05			RNA-dependent DNA replication	RNA binding
					Ank	1.5e-05
					Ank_2	5.8e-20
PTRG_01029	predicted protein	563	1.96				yes	yes
PTRG_01038	endoglucanase IV precursor	292	1.37		Glyco_hydro_61	3.7e-64	yes	yes						4	6
PTRG_01048	conserved hypothetical protein	351	0				yes	yes					4
PTRG_01076	conserved hypothetical protein	741	0.81		Peptidase_S41	5.2e-07	yes	yes	proteolysis	serine-type peptidase activity	peptidase s41 family protein
PTRG_01078	conserved hypothetical protein	483	0.41		DUF3722	0.0045	yes	yes		oxidoreductase activity	amine flavin-containing superfamily	2
					FAD_binding_2	3.9e-07				electron carrier activity	amine flavin-containing superfamily
PTRG_01138	Cip2	391	1.54				yes	yes
PTRG_01178	conserved hypothetical protein	281	2.86				yes	yes
PTRG_01241	hypothetical protein	398	2.02		Mo-co_dimer	0.075	yes	yes	catabolic process
					Pollen_allerg_1	0.0088	yes	yes	defense response
					DPBB_1	8.6e-08	yes	yes	response to other organism
									macromolecule metabolic process
									defense response
PTRG_01266	glucan 1,3-beta-glucosidase precursor	440	1.37		DUF2726	0.0017	yes	yes	carbohydrate metabolic process	hydrolase activity, hydrolyzing O-glycosyl compounds	beta- -glucanase
					Cellulase	2.4e-17				cation binding
PTRG_01272	lipase 1 precursor	562	1.78		COesterase	1.1e-96	yes	yes		hydrolase activity	triacylglycerol
PTRG_01274	isoamyl alcohol oxidase	585	1.37		BBE	5.1e-10	yes	yes		oxidoreductase activity	isoamyl alcohol oxidase
					FAD_binding_4	4.7e-16	yes	yes		FAD binding
PTRG_01290	exoglucanase 3 precursor	375	1.6		Baculo_gp41	0.087	yes	yes	cellulose catabolic process	hydrolase activity, hydrolyzing O-glycosyl compounds	exoglucanase 3 precursor
					Glyco_hydro_71	0.0053
					Glyco_hydro_6	5.2e-80
PTRG_01300	tripeptidyl-peptidase 1 precursor	568	1.41		Peptidase_S8	1.1e-07	yes	yes	proteolysis	serine-type endopeptidase activity	tripeptidyl peptidase sed3
					Pro-kuma_activ	1.4e-29
PTRG_01308	conserved hypothetical protein	544	2.39		T5orf172	1.6e-23	yes	yes					2	2
PTRG_01330	nuclease PA3	333	1.81	yes	S1-P1_nuclease	6e-71	yes	yes	DNA catabolic process	endonuclease activity	nuclease s1				2
										nucleic acid binding
PTRG_01333	carboxypeptidase S1	471	1.49		Peptidase_S10	0.0002	yes	yes	proteolysis	serine-type carboxypeptidase activity	carboxypeptidase s1
					Peptidase_S10	2.8e-40
PTRG_01341	conserved hypothetical protein	327	0.92				yes	yes					4		2
PTRG_01362	zinc carboxypeptidase A 1 precursor	489	0.2		Peptidase_M14	1.4e-39	yes	yes	proteolysis	metallocarboxypeptidase activity	peptidase m14
									response to cAMP	zinc ion binding
									cellular nitrogen compound biosynthetic process
PTRG_01367	acetylcholinesterase precursor	609	1.32		COesterase	1.8e-91	yes	yes		hydrolase activity	carboxylesterase family protein				2
PTRG_01382	predicted protein	201	0				yes	yes
PTRG_01391	FAD binding domain containing protein	542	0.92		FAD_binding_4	1e-22	yes	yes		oxidoreductase activity	fad binding domain containing protein
					BBE	0.0005				FAD binding
PTRG_01419	tyrosinase	675	0.59		Tyrosinase	6e-16	yes	yes	metabolic process	oxidoreductase activity	tyrosinase
						1.8e-22
PTRG_01459	aldose 1-epimerase	393	1.28		Aldose_epim	1.5e-47	yes	yes	hexose metabolic process	carbohydrate binding	aldose 1-epimerase
										isomerase activity
PTRG_01482	alpha/beta hydrolase fold domain containing protein	336	0.6		Abhydrolase_6	7.1e-32	yes	yes		hydrolase activity	alpha beta hydrolase fold protein
PTRG_01483	acetylcholinesterase precursor	691	1.16		COesterase	2e-76	yes	yes		cholinesterase activity	carboxylesterase family protein
PTRG_01504	conserved hypothetical protein	313	3.21				yes	yes
PTRG_01505	predicted protein	318	1.26				yes	yes
PTRG_01516	predicted protein	214	3.29				yes	yes
PTRG_01532	conserved hypothetical protein	244	2.47				yes	yes
PTRG_01551	peptidase M14	481	0.21		Peptidase_M14	5.9e-35	yes	yes	response to cAMP	metallocarboxypeptidase activity	peptidase m14				2
									proteolysis	zinc ion binding
									cellular nitrogen compound biosynthetic process
PTRG_01592	conserved hypothetical protein	498	3.62				yes	yes
PTRG_01608	FAD binding domain containing protein	537	1.12		BBE	0.096	yes	yes		oxidoreductase activity	fad binding domain containing protein
					FAD_binding_4	3.8e-22				FAD binding
PTRG_01673	conserved hypothetical protein	248	1.21		DUF3704	0.024	yes	yes		peroxidase activity	oxidase-like protein
PTRG_01673	conserved hypothetical protein	248	1.21		Peroxidase_2	5.9e-13	yes	yes		peroxidase activity	oxidase-like protein
PTRG_01682	conserved hypothetical protein	220	1.37		Acetyltransf_1	6.5e-08	yes	yes	metabolic process	N-acetyltransferase activity	gnat family
PTRG_01685	conserved hypothetical protein	361	2.5		Tyrosinase	9.1e-37	yes	yes	metabolic process	metal ion binding	tyrosinase		7	6	6
										oxidoreductase activity
PTRG_01729	predicted protein	316	5.71		ETX_MTX2	0.021	yes	yes
PTRG_01730	choline dehydrogenase	636	0.63		GMC_oxred_C	9.3e-32	yes	yes	alcohol metabolic process	FAD binding	choline dehydrogenase				2
					GMC_oxred_N	4.2e-58	yes			oxidoreductase activity, acting on CH-OH group of donors
PTRG_01745	glutamyl-tRNA (Gln) amidotransferase	623	0.64		Amidase	5.3e-38	yes	yes		carbon-nitrogen ligase activity, with glutamine as amido-N-donor	glutamyl-trna amidotransferase
										transferase activity
PTRG_01767	feruloyl esterase B precursor	523	1.92		Tannase	4.5e-35	yes	yes
					Tannase	3.4e-48	yes
PTRG_01775	catalase B precursor	708	0.28		Catalase-rel	6.5e-16	yes	yes	hydrogen peroxide catabolic process	heme binding	mycelial catalase cat1	2	2	2
					Catalase	1.4e-24	yes	yes	oxidation reduction	catalase activity
					Catalase	2.5e-111	yes	yes
					Catalase	1.4e-24	yes	yes
PTRG_01778	hypothetical protein	855	0.82				yes	yes						4	4
PTRG_01783	conserved hypothetical protein	240	1.26		Glyco_hydro_cc	1.3e-55	yes	yes						2
PTRG_01785	endo-1,3(4)-beta-glacanase 1 precursor	895	0.11		Glyco_hydro_81	3.5e-185	yes	yes	cell wall macromolecule catabolic process	endo-1,3(4)-beta-glucanase activity	endo- -beta-glucanase engl1
PTRG_01789	predicted protein	309	0				yes	yes
PTRG_01810	hypothetical protein	245	2.05		IL6Ra-bind	0.06	yes	yes						3	4
PTRG_01816	amidohydrolase 3	644	0.93		Amidohydro_3	6.6e-44	yes	yes		hydrolase activity, acting on carbon-nitrogen (but not peptide) bonds	amidohydrolase 3
PTRG_01835	conserved hypothetical protein	261	0.38				yes	yes
PTRG_01861	conserved hypothetical protein	498	1.01				yes	yes
PTRG_01875	conserved hypothetical protein	333	1.51				yes	yes
PTRG_01878	chitinase 1 precursor	704	1.71		Chitin_bind_1	0.0063	yes	yes	chitin catabolic process	chitinase activity	glycosyl family
					Glyco_hydro_18	1.4e-45				chitin binding
										cation binding
PTRG_01888	conserved hypothetical protein	499	1		BBE	6.8e-05	yes	yes		FAD binding	fad-dependent oxygenase			2
PTRG_01888	conserved hypothetical protein	499	1		BBE	6.8e-05	yes	yes		oxidoreductase activity	fad-dependent oxygenase			2
PTRG_01888	conserved hypothetical protein	499	1		FAD_binding_4	7.8e-22	yes	yes		FAD binding	fad-dependent oxygenase			2
PTRG_01888	conserved hypothetical protein	499	1		FAD_binding_4	7.8e-22	yes	yes		oxidoreductase activity	fad-dependent oxygenase			2
PTRG_01906	autoinducer 2 sensor kinase/phosphatase luxQ	2315	0.65		PAS_3	1.7e-08			signal transduction	two-component response regulator activity	autoinducer 2 sensor kinase phosphatase luxq		2	2
					HATPase_c	6.7e-26			two-component signal transduction system (phosphorelay)	ATP binding
					PAS_3	0.013			regulation of transcription, DNA-dependent	two-component sensor activity
					Response_reg	1.3e-16			peptidyl-histidine phosphorylation
					HisKA	1.9e-18
					PAS_3	1.7e-08
					HATPase_c	6.7e-26
					PAS	0.0031
PTRG_01936	conserved hypothetical protein	602	2.83				yes	yes					11	16	2
PTRG_01937	hypothetical protein	237	1.69		GMC_oxred_N	0.032	yes	yes					2
PTRG_01938	conserved hypothetical protein	422	2.14		Velvet	1.2e-05	yes	yes
PTRG_01973	conserved hypothetical protein	370	1.36				yes	yes
PTRG_01985	endoglucanase IV precursor	246	2.45		Glyco_hydro_61	2.1e-74	yes	yes
PTRG_02002	spherulin-1B precursor	276	1.45		Cupin_1	9e-11	yes	yes		manganese ion binding	spherulin-1b precursor
										nutrient reservoir activity
PTRG_02014	conserved hypothetical protein	231	1.74		Cupin_1	1.1e-11	yes	yes		metal ion binding
										nutrient reservoir activity	protein
PTRG_02024	hypothetical protein	212	1.9		DUF1994	1.9e-57	yes	yes
PTRG_02029	hypothetical protein	296	0.34				yes	yes				2
PTRG_02032	conserved hypothetical protein	548	0.18				yes	yes
PTRG_02043	hypothetical protein	499	0.4				yes	yes					4	2	4
PTRG_02046	conserved hypothetical protein	358	1.68				yes	yes	lipid metabolic process	phosphoric diester hydrolase activity	conserved hypothetical protein [Pyrenophora tritici-repentis Pt-1C-BFP]			4	2
PTRG_02060	conserved hypothetical protein	223	1.35		Glyco_hydro_61	9.9e-51	yes	yes
PTRG_02097	major allergen Asp f 2 precursor	303	2.32		Sporozoite_P67	0.083	yes	yes
PTRG_02122	conserved hypothetical protein	263	1.53				yes	yes					2
PTRG_02128	conserved hypothetical protein	1393	1.15		HET	8.1e-10	yes	yes
PTRG_02130	conserved hypothetical protein	531	1.32		DUF1237	3e-152	yes	yes		catalytic activity	duf1237 domain-containing protein
PTRG_02152	predicted protein	672	1.19	yes			yes	yes
PTRG_02164	initiation-specific alpha-1,6-mannosyltransferase	399	0.5		Gly_transf_sug	1.3e-12	yes	yes		transferase activity, transferring glycosyl groups	initiation-specific alpha- -mannosyltransferase		1	2	2
PTRG_02192	esterase	257	0		Lipase_GDSL	7.1e-13	yes	yes	lipid metabolic process	hydrolase activity, acting on ester bonds	gdsl-like lipase acylhydrolase
PTRG_02206	conserved hypothetical protein	211	2.86		Chitin_bind_3	3.8e-10	yes	yes
PTRG_02209	conserved hypothetical protein	354	1.42		Glyco_hydro_16	2.3e-07	yes	yes	carbohydrate metabolic process	hydrolase activity, hydrolyzing O-glycosyl compounds	xylanase 3
PTRG_02232	hypothetical protein	292	1.03				yes	yes				2	8		4
PTRG_02234	rhamnogalacturonate lyase precursor	566	0.53		RhgB_N	0.024	yes	yes	carbohydrate metabolic process	carbohydrate binding	rhamnogalacturonate lyase
					DUF2012	0.0019				lyase activity
PTRG_02238	hypothetical protein	216	2.33				yes	yes							2
PTRG_02257	carboxypeptidase cpdS precursor	567	1.41		Peptidase_S10	1e-83	yes	yes	proteolysis	serine-type carboxypeptidase activity	serine carboxypeptidase
PTRG_02260	hypothetical protein	407	0.99	yes	Asp	7.8e-32	yes	yes	proteolysis	aspartic-type endopeptidase activity	pepsinogen c		2
PTRG_02278	UDP-glucose:glycoprotein glucosyltransferase precursor	1509	0.4		Glyco_transf_8	0.0046	yes	yes	protein amino acid glycosylation	UDP-glucose:glycoprotein glucosyltransferase activity	udp-glucose:glycoprotein glucosyltransferase
					UDP-g_GGTase	1.4e-61
PTRG_02279	conserved hypothetical protein	408	2.21	yes	DUF3431	2.7e-86	yes	yes					2	2
PTRG_02291	laccase-1 precursor	594	1.69	yes	Cu-oxidase_2	5.4e-31	yes	yes	oxidation reduction	copper ion binding	laccase-1 precursor
					Cu-oxidase	2e-31				oxidoreductase activity
					Cu-oxidase_3	1.2e-38
PTRG_02292	conserved hypothetical protein	358	0.84		IU_nuc_hydro	7.8e-17	yes	yes
PTRG_02303	conserved hypothetical protein	515	0.78	yes	BBE	0.00029	yes	no		FAD binding	fad-dependent oxygenase
					FAD_binding_4	1.4e-21	yes	no		oxidoreductase activity
PTRG_02323	beta-galactosidase	610	0.66		Glyco_hydro_2	5.1e-08	yes	yes	carbohydrate metabolic process	hydrolase activity, hydrolyzing O-glycosyl compounds	glycosyl hydrolase family
					Glyco_hydro_2_C	1.4e-10				cation binding
					Glyco_hydro_2_N	9.4e-23
PTRG_02327	1,3-beta-glucanosyltransferase gel3 precursor	445	1.35		Glyco_hydro_72	3.2e-97	yes	yes	carbohydrate metabolic process	transferase activity	-beta-
										cation binding
PTRG_02343	FAD binding domain containing protein	624	1.61		FAD_binding_3	4.3e-08	yes	yes	oxidation reduction	monooxygenase activity	fad binding domain containing protein			1	2
					Tyrosinase	3.7e-47				metal ion binding
PTRG_02344	conserved hypothetical protein	256	1.18		DUF3455	1.9e-33	yes	yes					2
PTRG_02358	oryzin precursor	399	0.75		Inhibitor_I9	9.2e-10	yes	yes	negative regulation of catalytic activity	identical protein binding	subtilisin-like serine protease pr1a	1
					Peptidase_S8	2.3e-50			proteolysis	serine-type endopeptidase activity
PTRG_02367	alpha-glucosidase precursor	906	0.88		Glyco_hydro_31	2.7e-148	yes	yes	carbohydrate metabolic process	hydrolase activity, hydrolyzing O-glycosyl compounds	alpha-glucosidase
PTRG_02372	isochorismatase hydrolase	285	0.35		Isochorismatase	2.9e-19	yes	yes	metabolic process	hydrolase activity	isochorismatase hydrolase
PTRG_02374	conserved hypothetical protein	413	1.46		Tyrosinase	2.9e-47	yes	yes	metabolic process	metal ion binding	tyrosinase central domain protein
										oxidoreductase activity
PTRG_02377	glucan 1,3-beta-glucosidase precursor	455	1.54		Cellulase	4.6e-19	yes	yes	carbohydrate metabolic process	hydrolase activity, hydrolyzing O-glycosyl compounds	exo-beta- -glucanase
										cation binding
PTRG_02407	short chain dehydrogenase/reductase 3	252	1.99		adh_short	6.8e-28	yes	yes	oxidation reduction	oxidoreductase activity	dehydrogenase reductase sdr family member 8 precursor
										binding
PTRG_02410	carboxypeptidase S1	581	1.72		Peptidase_S10	8.8e-94	yes	yes	proteolysis	serine-type carboxypeptidase activity	carboxypeptidase s1
PTRG_02427	conserved hypothetical protein	325	0.62		Lipase_GDSL	8.2e-12	yes	yes	lipid metabolic process	hydrolase activity, acting on ester bonds	carbohydrate esterase family 16 protein
PTRG_02477	ubiquitin carboxyl-terminal hydrolase isozyme L1	261	1.15		Peptidase_C12	1.1e-54	yes	yes	ubiquitin-dependent protein catabolic process	ubiquitin thiolesterase activity	ubiquitin carboxyl-terminal hydrolase isozyme l3		2
PTRG_02486	acid phosphatase precursor	302	1.99		SurE	1.5e-27	yes	yes		hydrolase activity	5 3 -nucleotidase family protein
PTRG_02495	GPI-anchor transamidase precursor	376	1.33		Peptidase_C13	8.7e-42	yes	yes	proteolysis	cysteine-type endopeptidase activity	gpi-anchor transamidase precursor	2	2
PTRG_02498	mannan endo-1,6-alpha-mannosidase DCW1 precursor	540	1.3		Glyco_hydro_76	2.3e-128	yes	yes		catalytic activity	mannan endo- -alpha-mannosidase dcw1 precursor
PTRG_02558	conserved hypothetical protein	451	1.11		Peroxidase_2	1.3e-17	yes	yes		peroxidase activity	af448056_2 oxidase
PTRG_02562	endoglucanase B	339	0.59		Glyco_hydro_61	5.6e-61	yes	yes		hydrolase activity	endoglucanase b
PTRG_02563	conserved hypothetical protein	992	0.5				yes	yes					3	2
PTRG_02587	conserved hypothetical protein	410	1.47	yes	Nucleotid_trans	5.2e-05	yes	yes		transferase activity, transferring hexosyl groups	conserved hypothetical protein [Pyrenophora tritici-repentis Pt-1C-BFP]
PTRG_02590	acid protease	279	0.72		Peptidase_A4	5.2e-83	yes	yes	proteolysis	aspartic-type endopeptidase activity	aspergillopepsin-2
PTRG_02594	neutral ceramidase precursor	751	0.93	yes	Ceramidase_alk	3.8e-286	yes	yes
PTRG_02595	dipeptidase domain containing protein	523	0.38		Peptidase_C69	7.2e-26	yes	yes	proteolysis	dipeptidase activity	peptidase dipeptidase
PTRG_02639	conserved hypothetical protein	207	1.94				yes	yes					10	7
PTRG_02640	carboxypeptidase S1	695	1.59		Peptidase_S10	7.9e-71	yes	yes	proteolysis	serine-type carboxypeptidase activity	carboxypeptidase s1
PTRG_02746	galactan 1,3-beta-galactosidase	448	0.89		Coiled	0.015	yes	yes	carbohydrate metabolic process	hydrolase activity, hydrolyzing O-glycosyl compounds	glycosyl hydrolase family 43 protein
PTRG_02746	galactan 1,3-beta-galactosidase	448	0.89		Glyco_hydro_43	3.2e-17	yes	yes	carbohydrate metabolic process	hydrolase activity, hydrolyzing O-glycosyl compounds	glycosyl hydrolase family 43 protein
PTRG_02747	cutinase precursor	224	1.79		Cutinase	8.9e-47	yes	yes	response to cAMP	cutinase activity	cutinase
									carbohydrate metabolic process
									developmental maturation
PTRG_02776	serine/threonine-protein kinase/endoribonuclease IRE1 precursor	1107	1.27		PQQ	0.022	yes	yes	mRNA processing	ATP binding	protein kinase and ribonuclease		2
					Pkinase	3.7e-42			protein amino acid phosphorylation	endoribonuclease activity, producing 5'-phosphomonoesters
					Ribonuc_2-5A	3.1e-43
					PQQ	0.022
PTRG_02796	conserved hypothetical protein	213	5.66				yes	yes							2
PTRG_02814	choline dehydrogenase	494	0.81		Pyr_redox_2	0.007	yes	yes	alcohol metabolic process	oxidoreductase activity, acting on CH-OH group of donors	choline dehydrogenase
					GMC_oxred_C	0.0067				FAD binding
					GMC_oxred_N	2.4e-19
PTRG_02818	conserved hypothetical protein	691	1.16		SAM_1	1.1e-09	yes	yes		DNA binding	chromatin-associated protein				2
PTRG_02818	conserved hypothetical protein	691	1.16		HMG_box	1.9e-12	yes	yes		DNA binding	chromatin-associated protein				2
PTRG_02864	gamma-glutamyltranspeptidase 1 precursor	575	0.87		G_glu_transpept	5.1e-154	yes	yes		gamma-glutamyltransferase activity	gamma-glutamyltranspeptidase			2
PTRG_02878	acetylornithine deacetylase	404	0.5		Peptidase_M20	2e-17	yes	yes	proteolysis	protein binding	acetylornithine deacetylase				2
					M20_dimer	6.6e-18				metallopeptidase activity
PTRG_02930	oxidoreductase domain containing protein	401	0.75		GFO_IDH_MocA	3.6e-19	yes	yes	metabolic process	oxidoreductase activity	dimeric dihydrodiol			2	6
										binding
PTRG_02941	endoglucanase II	323	3.73		CBM_1	4.1e-10	yes	yes	carbohydrate metabolic process	cellulose binding	endoglucanase ii
					Glyco_hydro_61	2e-62	yes	yes		hydrolase activity, hydrolyzing O-glycosyl compounds
PTRG_02943	peptidyl-prolyl cis-trans isomerase B precursor	209	0	yes	Pro_isomerase	3.7e-48	yes	yes	protein folding	peptide binding	peptidyl-prolyl cis-trans isomerase b precursor		4	6	2
										peptidyl-prolyl cis-trans isomerase activity
PTRG_02979	pisatin demethylase	471	0.64	yes	p450	5.1e-50	yes	yes		electron carrier activity	benzoate 4-monooxygenase cytochrome p450			2	1
										methyltransferase activity
PTRG_02986	lipase precursor	392	2.81		Lipase_3	4.8e-33	yes	yes	lipid metabolic process	triglyceride lipase activity	extracellular triacylglycerol		1		1
PTRG_03007	conserved hypothetical protein	269	2.61				yes	yes
PTRG_03012	ent-kaurene oxidase	549	1.46		p450	7.2e-35	yes	yes		heme binding	cytochrome p450			2
										monooxygenase activity
										electron carrier activity
PTRG_03017	conserved hypothetical protein	282	0.36		adh_short	1e-15	yes	yes	oxidation reduction	oxidoreductase activity	short-chain dehydrogenase reductase		6
										binding
PTRG_03018	cel1 protein precursor	293	2.74		Glyco_hydro_61	4.9e-65	yes	yes	carbohydrate metabolic process	hydrolase activity, acting on glycosyl bonds	glycoside hydrolase family 61 protein
PTRG_03024	predicted protein	250	2.41				yes	yes
PTRG_03027	aminopeptidase Y precursor	510	1.38		PA	1.1e-15	yes	yes	proteolysis	receptor activity	aminopeptidase y		3	2
					Peptidase_M28	4.3e-33				aminopeptidase activity
PTRG_03041	ligninase H2 precursor	401	1.75		peroxidase	4e-33	yes	yes	response to oxidative stress	heme binding	ligninase h2 precursor		6
									oxidation reduction	peroxidase activity
									response to cAMP
PTRG_03045	predicted protein	261	1.15				yes	yes
PTRG_03055	FAD binding domain containing protein	533	1.69		UPF0167	0.068	yes	yes		oxidoreductase activity	fad binding domain containing protein
					BBE	4.9e-05				FAD binding
					FAD_binding_4	3.4e-22
PTRG_03061	chitin binding protein	495	5.67		Chitin_bind_1	0.00016	yes	yes	cell wall macromolecule catabolic process	chitinase activity	chitin binding protein
					Chitin_bind_1	0.00013			chitin catabolic process	chitin binding
					Chitin_bind_1	2.7e-07				hydrolase activity, acting on carbon-nitrogen (but not peptide) bonds
					Polysacc_deac_1	2.2e-29
PTRG_03062	predicted protein	799	0.75	yes			yes	yes
PTRG_03084	conserved hypothetical protein	314	3.51				yes	yes					4	4	4
PTRG_03125	carboxypeptidase Y precursor	488	2.46		Peptidase_S10	2.5e-96	yes	yes	proteolysis	serine-type carboxypeptidase activity	carboxypeptidase y
PTRG_03134	conserved hypothetical protein	473	1.27		Fringe	0.00074	yes	yes
PTRG_03160	dipeptidyl-peptidase 5 precursor	731	0.68		Peptidase_S9	1e-47	yes	yes					1	2
PTRG_03237	predicted protein	288	0.35				yes	yes
PTRG_03252	predicted protein	937	0.32				yes	yes
PTRG_03293	conserved hypothetical protein	1093	1.65		HET	2e-27	yes	yes					1
PTRG_03326	conserved hypothetical protein	561	0.18		HPC2	0.016	yes	yes
PTRG_03333	prenylcysteine oxidase 1	518	0.19		DAO	1.3e-05	yes	yes	prenylcysteine catabolic process	oxidoreductase activity, acting on sulfur group of donors, oxygen as acceptor	prenylcysteine lyase
					Prenylcys_lyase	6.4e-35	yes	yes	oxidation reduction
PTRG_03350	ligninase LG6 precursor	349	1.72		peroxidase	1.3e-32	yes	yes	response to oxidative stress	heme binding	ligninase h2 precursor			2
									response to cAMP	peroxidase activity
									oxidation reduction
PTRG_03369	tyrosinase	751	1.07	yes	Tyrosinase	6.7e-46	yes	yes	metabolic process	oxidoreductase activity	tyrosinase precursor		4		4
PTRG_03370	mixed-linked glucanase precursor	372	2.16		Glyco_hydro_16	6.9e-08	yes	yes	carbohydrate metabolic process	hydrolase activity, hydrolyzing O-glycosyl compounds	endo- -beta-
PTRG_03374	hypothetical protein	255	0.39		PBP	1.1e-16	yes	yes					2		2
PTRG_03392	fungal cellulose binding domain containing protein	337	3.27		Yeast-kill-tox	0.014	yes	yes	carbohydrate metabolic process	cellulose binding	fungal cellulose binding domain containing protein	*1
					CBM_1	3.4e-10				hydrolase activity, hydrolyzing O-glycosyl compounds
					Glyco_hydro_61	1.7e-48
PTRG_03422	predicted protein	218	2.76		DCD	0.1	yes	yes
PTRG_03444	exoglucanase-6A precursor	400	1.5		Glyco_hydro_6	5e-112	yes	yes	cellulose catabolic process	cellulose binding	cellobiohydrolase ii	*4
										cellulose 1,4-beta-cellobiosidase activity
PTRG_03452	beta-lactamase family protein	591	0.68		Beta-lactamase	1.5e-39	yes	yes
PTRG_03468	conserved hypothetical protein	259	1.16		Peroxidase_2	2.7e-34	yes	yes		peroxidase activity	conserved hypothetical protein [Pyrenophora tritici-repentis Pt-1C-BFP]
PTRG_03496	conserved hypothetical protein	901	0.44		Peptidase_S9	4.4e-08	yes	yes
PTRG_03518	conserved hypothetical protein	466	1.08		HET	5.4e-19	yes	yes					2
PTRG_03544	predicted protein	289	2.43				yes	yes
PTRG_03570	predicted protein	232	1.3				yes	yes
PTRG_03591	dehydrogenase/reductase SDR family member 8 precursor	359	1.4		adh_short	1.5e-27	yes	yes	oxidation reduction	oxidoreductase activity	dehydrogenase reductase sdr family member 8 precursor				4
										binding
PTRG_03621	conserved hypothetical protein	1677	0.6		TRAPPC10	1.5e-29	yes	yes						2	2
					Foie-gras_1	0.00014
					DUF2012	1.1e-27
PTRG_03633	oxalate decarboxylase oxdD	459	0.22		Cupin_1	2.5e-12	yes	yes	regulation of transcription, DNA-dependent	nutrient reservoir activity	oxalate decarboxylase oxdc		2	1	2
					Cupin_1	2.6e-16				oxalate decarboxylase activity
										transcription factor activity
PTRG_03637	candidapepsin-4 precursor	481	0.83		Asp	1e-76	yes	yes	proteolysis	aspartic-type endopeptidase activity	aspartic-type endopeptidase			2
PTRG_03640	carboxypeptidase S1	589	1.19		Peptidase_S10	4.7e-96	yes	yes	proteolysis	serine-type carboxypeptidase activity	carboxypeptidase s1
PTRG_03654	endoglucanase B	230	2.62		Glyco_hydro_61	5.2e-58	yes	yes
PTRG_03665	chitin binding protein	421	3.33		Chitin_bind_1	7.4e-07			carbohydrate metabolic process	chitin binding	chitin binding protein
					Polysacc_deac_1	3.3e-27			macromolecule metabolic process	hydrolase activity, acting on carbon-nitrogen (but not peptide) bonds
									catabolic process
PTRG_03675	endoglucanase IV precursor	343	1.17		Glyco_hydro_61	4.6e-75	yes	yes
PTRG_03682	choline dehydrogenase	614	0.49		GMC_oxred_C	2.1e-38	yes	yes	alcohol metabolic process	FAD binding	glucose-methanol-choline oxidoreductase:gmc oxidoreductase	2
					GMC_oxred_N	4.5e-57				oxidoreductase activity, acting on CH-OH group of donors
PTRG_03687	peroxidase 40 precursor	334	2.4		DUF3415	0.023	yes	yes	oxidation reduction	heme binding	ligninase lg6 precursor				2
					peroxidase	3.1e-33			response to oxidative stress	peroxidase activity
PTRG_03714	beta-1,3-exoglucanase	858	1.05		End_N_terminal	0.016	yes	yes	carbohydrate metabolic process	hydrolase activity	exo-beta- -
					Pectate_lyase_3	2.4e-16			carbohydrate metabolic process
					Pectate_lyase_3	1.8e-70			developmental maturation
					End_N_terminal	0.021			carbohydrate metabolic process
									response to cAMP
PTRG_03737	conserved hypothetical protein	362	0.28		NAD_binding_1	2.4e-05	yes	yes	oxidation reduction	oxidoreductase activity	cytochrome c mitochondrial import factor
					FAD_binding_6	1.5e-08			cellular process
PTRG_03747	cell surface protein Mas1	315	1.59		CytB6-F_Fe-S	0.063	yes	yes	pathogenesis
					DUF3129	9.9e-71			response to cAMP
PTRG_03757	conserved hypothetical protein	423	1.9				yes	yes
PTRG_03782	conserved hypothetical protein	291	2.07		CAP	7.3e-19	yes	yes
PTRG_03786	glutamate carboxypeptidase 2	734	0.41		PA	2.6e-05	yes	yes	proteolysis	carboxypeptidase activity	glutamate carboxypeptidase
					TFR_dimer	3e-12
					Peptidase_M28	4.2e-18
PTRG_03798	predicted protein	220	5.48				yes	yes
PTRG_03816	hypothetical protein	276	1.09				yes	yes					1		3
PTRG_03820	exoglucanase 3 precursor	393	1.02		Glyco_hydro_6	3.8e-83	yes	yes	cellulose catabolic process	hydrolase activity, hydrolyzing O-glycosyl compounds	exoglucanase 3 precursor
PTRG_03847	conserved hypothetical protein	438	0.69		Peroxidase_2	4e-10	yes	yes		peroxidase activity	oxidase		1
PTRG_03864	hypothetical protein	325	2.47		DUF1996	1.7e-52	yes	yes					2
PTRG_03885	conserved hypothetical protein	443	0.45				yes	yes		peroxidase activity	af448056_2 oxidase		1	2
PTRG_03887	tripeptidyl-peptidase 1 precursor	597	1.17		Peptidase_S8	4.9e-10	yes	yes	proteolysis	serine-type endopeptidase activity	tripeptidyl-peptidase
					Pro-kuma_activ	9.3e-38
PTRG_03891	cytochrome P450 71B25	548	1.1	yes	p450	2.7e-58	yes	yes	oxidation reduction	electron carrier activity	sterigmatocystin biosynthesis p450 monooxygenase stcs
										heme binding
										monooxygenase activity
PTRG_03894	conserved hypothetical protein	360	0.84				yes	yes
PTRG_03919	pectin lyase A precursor	379	1.59		Pec_lyase_C	1.3e-19	yes	yes		pectin lyase activity	pectin lyase
PTRG_03943	endo-1,4-beta-xylanase precursor	359	1.4		Glyco_hydro_10	3e-95	yes	yes	xylan catabolic process	hydrolase activity, hydrolyzing O-glycosyl compounds	endo- -beta-xylanase precursor
										cation binding
PTRG_03946	isoamyl alcohol oxidase	566	1.59		BBE	1.6e-10	yes	yes		oxidoreductase activity	fad-dependent isoamyl alcohol
					FAD_binding_4	9.3e-19				FAD binding
PTRG_03960	conserved hypothetical protein	310	0.32		LicD	4.2e-35	yes	yes
PTRG_03963	conserved hypothetical protein	521	1.92	yes	Abhydrolase_1	7.7e-08	yes	yes
					Abhydrolase_4	7.4e-16
PTRG_03974	conserved hypothetical protein	344	3.5		DUF1996	3.1e-86	yes	yes
PTRG_04008	glucosidase I	814	0.49		Glyco_hydro_63	2.7e-243	yes	yes	oligosaccharide metabolic process	mannosyl-oligosaccharide glucosidase activity	mannosyl-oligosaccharide glucosidase
PTRG_04024	metalloprotease MEP1	252	2.39		Peptidase_M43	8.1e-07	yes	yes		metallopeptidase activity	metalloprotease mep1
PTRG_04025	GPI-anchored cell wall beta-1,3-endoglucanase EglC	319	0.94		Glyco_hydro_17	2.6e-07	yes	yes	carbohydrate metabolic process	hydrolase activity, hydrolyzing O-glycosyl compounds	gpi-anchored cell wall beta- -endoglucanase		7	10	6
PTRG_04040	peptidase S41 family protein	760	0.79		Peptidase_S41	1.9e-08	yes	yes	proteolysis	serine-type peptidase activity	peptidase s41 family protein
PTRG_04050	conserved hypothetical protein	414	0.48				yes	yes
PTRG_04053	predicted protein	243	2.07				yes	yes
PTRG_04064	hypothetical protein	248	4.86				yes	yes					2
PTRG_04120	conserved hypothetical protein	794	1.13		Glyco_hydro_92	4e-163	yes	yes		hydrolase activity	alpha- -
PTRG_04143	hypothetical protein	843	0.48				yes	yes					2	12	4
PTRG_04147	cytochrome P-450	496	2.02	yes	p450	2.1e-58	yes	yes	oxidation reduction	heme binding	cytochrome p-450
										monooxygenase activity
										electron carrier activity
PTRG_04184	conserved hypothetical protein	749	1.07		Peptidase_S41	1.6e-06	yes	yes	proteolysis	serine-type peptidase activity	peptidase s41 family protein
PTRG_04188	pisatin demethylase	497	2.02	yes	p450	6.2e-53	yes	yes	oxidation reduction	heme binding	cytochrome p450
										monooxygenase activity
										electron carrier activity
										methyltransferase activity
PTRG_04207	conserved hypothetical protein	218	2.76				yes	yes
PTRG_04245	6-hydroxy-D-nicotine oxidase	559	1.61		BBE	2.1e-12	yes	yes		oxidoreductase activity	fad binding domain protein		3		4
					FAD_binding_4	3.7e-18				FAD binding
PTRG_04246	cytochrome P450 monooxigenase GliC2	492	0.41		p450	1.8e-32	yes	yes	oxidation reduction	heme binding	cytochrome p450 monooxigenase 2		8		2
										monooxygenase activity
										electron carrier activity
PTRG_04261	copper radical oxidase	924	3.25		WSC	7.1e-15	yes	yes						4	4
					Glyoxal_oxid_N	1.1e-24
					DUF1929	1.6e-18
					WSC	3.4e-17
					WSC	2.6e-18
PTRG_04272	FAD binding domain containing protein	501	1.2		BBE	0.036	yes	yes		FAD binding	fad binding domain containing protein
					FAD_binding_4	1.4e-24				oxidoreductase activity
PTRG_04285	endoglucanase precursor	334	0.6		Cellulase	3.1e-53	yes	yes	carbohydrate metabolic process	hydrolase activity, hydrolyzing O-glycosyl compounds	endoglucanase precursor	*1
										cation binding
PTRG_04290	cytochrome P450 4A5 precursor	454	1.55	yes	p450	6.4e-53	yes	yes	oxidation reduction	heme binding	benzoate 4-monooxygenase cytochrome p450		4	2	1
										monooxygenase activity
										electron carrier activity
PTRG_04293	alpha-mannosidase IC	597	1.17	yes	Glyco_hydro_47	2e-166	yes	yes		mannosyl-oligosaccharide 1,2-alpha-mannosidase activity	alpha-mannosidase ic		2	2
										calcium ion binding
PTRG_04301	alpha-1,2-mannosyltransferase ALG11	545	0.55	yes	Glycos_transf_1	5.8e-20	yes	yes	biosynthetic process	transferase activity, transferring glycosyl groups	alpha- -mannosyltransferase alg11
									mycelium development	transferase activity, transferring glycosyl groups
PTRG_04325	conserved hypothetical protein	433	1.16		Peroxidase_2	2.3e-21	yes	yes		peroxidase activity	secreted chloroperoxidase
PTRG_04328	conserved hypothetical protein	324	1.24		DPBB_1	1.8e-05	yes	yes					7	14	10
PTRG_04347	predicted protein	254	4.35		Connexin	0.02	yes	yes
PTRG_04379	hypothetical protein	540	0.56		PP2C	6.5e-39	yes	yes		[pyruvate dehydrogenase (lipoamide)] phosphatase activity	protein phophatase 2c family protein		4		2
PTRG_04381	conserved hypothetical protein	448	2.01				yes	yes	lipid metabolic process	phosphoric diester hydrolase activity	conserved hypothetical protein [Pyrenophora tritici-repentis Pt-1C-BFP]		2	2
PTRG_04396	GPI-anchored cell wall organization protein Ecm33	393	1.28		Recep_L_domain	0.0018	yes	yes				4		2	2
					Ecm33	8.3e-12
PTRG_04423	COPII vesicle coat component Erp5/Erp6	223	1.35		DUF1940	0.081	yes	yes	transport	receptor activity	endosomal cargo receptor
					Shugoshin_N	0.016
					EMP24_GP25L	4.7e-51
PTRG_04427	PAF acetylhydrolase family protein	382	0.79		Abhydrolase_5	4.4e-19	yes	yes		hydrolase activity	paf acetylhydrolase family protein
PTRG_04430	endoglucanase B	335	1.5	yes	Glyco_hydro_61	1.1e-46	yes	yes
PTRG_04432	conserved hypothetical protein	263	2.67				yes	yes
PTRG_04443	hypothetical protein	253	6.35				yes	yes					4		5
PTRG_04491	NIMA-interacting protein TinC	982	0.92		Het-C	3.7e-263	yes	yes					3	5
PTRG_04515	conserved hypothetical protein	548	0.91		Beta-lactamase	6.7e-35	yes	yes				2	1		2
PTRG_04539	polysaccharide synthase Cps1p	465	1.94	yes	Glycos_transf_2	1.3e-08	yes	yes		transferase activity, transferring glycosyl groups	polysaccharide synthase cps1		2		2
PTRG_04556	predicted protein	279	2.88				yes	yes
PTRG_04558	FAD binding domain containing protein	510	0.79		FAD_binding_4	2.1e-19	yes	yes		oxidoreductase activity	fad dependent		4		2
										FAD binding
PTRG_04560	glucan 1,3-beta-glucosidase precursor	422	0.95		Cellulase	9.6e-14	yes	yes	carbohydrate metabolic process	hydrolase activity, hydrolyzing O-glycosyl compounds	glucan -beta-glucosidase
										cation binding
PTRG_04565	hypothetical protein	493	1.02				yes	yes					6	17	2
PTRG_04590	hypothetical protein	404	1.99		Metallophos	4.3e-10	yes	yes		hydrolase activity	calcineurin-like phosphoesterase
PTRG_04596	conserved hypothetical protein	540	0.74				yes	yes						2
PTRG_04628	nuclease PA3	313	2.56		S1-P1_nuclease	2e-61	yes	yes	DNA catabolic process	endonuclease activity	nuclease pa3		2
										nucleic acid binding
PTRG_04656	endo-1,4-beta-xylanase	423	2.61	yes	CBM_1	4.9e-11	yes	yes	xylan catabolic process	cellulose binding	endo- -beta-xylanase
					Glyco_hydro_10	1.5e-100				endo-1,4-beta-xylanase activity
										cation binding
PTRG_04657	feruloyl esterase B precursor	552	2.54		Tannase	5.6e-114	yes	yes
PTRG_04672	conserved hypothetical protein	587	1.71		p450	8.2e-53	yes	yes	oxidation reduction	heme binding	cytochrome p450		2		3
										monooxygenase activity
										electron carrier activity
PTRG_04680	predicted protein	570	4.57		LysM	0.004	yes	yes	cell wall macromolecule catabolic process
PTRG_04696	galactan 1,3-beta-galactosidase	487	0.21		Glyco_hydro_43	1.4e-12	yes	yes	carbohydrate metabolic process	hydrolase activity, hydrolyzing O-glycosyl compounds	galactan -beta-galactosidase
PTRG_04697	pectate lyase D	270	4.46		Pectate_lyase	1.1e-56	yes	yes		pectate lyase activity	pectate lyase
PTRG_04728	galactose oxidase precursor	512	0.78		Glyoxal_oxid_N	0.0084	yes	yes	mycelium development
					Kelch_1	0.0013
					Glyoxal_oxid_N	0.00041
					DUF1929	5.5e-23
PTRG_04739	conserved hypothetical protein	688	1.02		Polysacc_deac_1	0.035	yes	yes					4	10	12
PTRG_04771	cutinase precursor	251	2		Cutinase	1.2e-44	yes	yes	metabolic process	cutinase activity	cutinase precursor
PTRG_04829	endoglucanase-5	228	6.17		Glyco_hydro_45	8.7e-92	yes	yes	polysaccharide catabolic process	cellulase activity	beta- -endoglucanase	*2
PTRG_04830	conserved hypothetical protein	455	2.64	yes	PAN_3	0.069	yes	yes		transferase activity, transferring glycosyl groups
					Fringe	0.027				transferase activity, transferring glycosyl groups
PTRG_04849	conserved hypothetical protein	632	0.79		DUF1565	0.051	yes	yes
PTRG_04865	conserved hypothetical protein	668	1.05		Peptidase_M6	0.1	yes	yes
					Peptidase_M6	0.0024
PTRG_04903	endochitinase 1 precursor	423	0.47		Glyco_hydro_18	1.3e-88	no	no	chitin catabolic process	chitinase activity	endochitinase 1
										cation binding
PTRG_04915	conserved hypothetical protein	346	1.74		PAT1	0.1	yes	yes
					SET	3.4e-12
PTRG_04926	major royal jelly protein	402	0.25		MRJP	1.8e-19	yes	yes
PTRG_04929	predicted protein	600	1.84				yes	yes
PTRG_04959	acetylxylan esterase precursor	452	2		Cutinase	1.2e-26	yes	yes	metabolic process	cutinase activity	acetylxylan esterase precursor	*2	2	2
PTRG_04977	peptidase M28	484	0.62		Peptidase_M28	1e-25	yes	yes	proteolysis	peptidase activity	peptidase m28
PTRG_05007	conserved hypothetical protein	469	2.14		His_Phos_2	7.5e-21	yes	yes		calcium ion binding	histidine acid phosphatase				2
										acid phosphatase activity
PTRG_05027	predicted protein	209	0		RepB	0.092	yes	yes							2
					DUF3549	0.018
PTRG_05042	alpha-amylase A type-3 precursor	588	1.53		CBM_20	1.7e-27	yes	yes	carbohydrate catabolic process	carbohydrate binding	alpha-amylase a type-3 precursor
					Alpha-amylase	1.5e-63				alpha-amylase activity
					DUF1966	2.5e-05				calcium ion binding
PTRG_05044	endoglucanase II	223	1.8		Glyco_hydro_61	6.3e-63	yes	yes
PTRG_05053	endonuclease/exonuclease/phosphatase family protein	608	0.33		Exo_endo_phos	1.2e-13	yes	yes		endonuclease activity	endonuclease exonuclease phosphatase family protein
										exonuclease activity
PTRG_05077	palmitoyl-protein thioesterase 1 precursor	328	1.22		Palm_thioest	1.2e-45	yes	yes	protein modification process	palmitoyl-(protein) hydrolase activity	palmitoyl-protein thioesterase precursor				2
PTRG_05086	predicted protein	399	0				yes	yes
PTRG_05138	predicted protein	242	1.66				yes	yes
PTRG_05148	choline dehydrogenase	607	0.5		GMC_oxred_C	1.9e-39	yes	yes	alcohol metabolic process	FAD binding	gmc		4
					GMC_oxred_N	7.7e-51				oxidoreductase activity, acting on CH-OH group of donors
PTRG_05170	conserved hypothetical protein	348	0.58				yes	yes
PTRG_05210	extracellular invertase	630	0.32		Glyco_hydro_32N	7.6e-16	yes	yes	carbohydrate metabolic process	transferase activity	extracellular invertase		2
					Glyco_hydro_32C	1e-13				hydrolase activity, hydrolyzing O-glycosyl compounds
PTRG_05213	conserved hypothetical protein	431	0.7		Peroxidase_2	1.5e-14	yes	yes		peroxidase activity	conserved hypothetical protein [Pyrenophora tritici-repentis Pt-1C-BFP]
PTRG_05218	conserved hypothetical protein	322	1.25		Epimerase	5e-22	yes	yes	cellular metabolic process	catalytic activity	nucleoside-diphosphate-sugar
										coenzyme binding
PTRG_05235	endoglucanase-5	352	6.27		CBM_1	1.4e-06	yes	yes	polysaccharide catabolic process	cellulase activity	glycoside hydrolase 45
					CBM_1	1.3e-08				cellulose binding
					Glyco_hydro_45	1.6e-73
PTRG_05246	ABC-type Fe3+ transport system	357	0.28		SBP_bac_1	0.0078	yes	yes
PTRG_05267	liver carboxylesterase 1 precursor	545	1.29		COesterase	1.4e-94	yes	yes		cholinesterase activity	para-nitrobenzyl esterase
PTRG_05268	hypothetical protein	224	1.79				yes	yes					2		2
PTRG_05270	conserved hypothetical protein	443	1.58				yes	yes					2	1
PTRG_05288	conserved hypothetical protein	227	1.77				yes	yes
PTRG_05301	acetylxylan esterase 1 precursor	298	1.35		DUF2235	0.067	yes	yes	polysaccharide catabolic process	carboxylesterase activity	acetyl xylan
					Esterase_phd	1.1e-21
PTRG_05309	para-nitrobenzyl esterase	584	1.54		COesterase	3.5e-78	yes	yes		hydrolase activity	triacylglycerol lipase		4
PTRG_05327	3-phytase B precursor	530	1.89	yes	His_Phos_2	4.3e-34	yes	yes		acid phosphatase activity	3-phytase b precursor
PTRG_05338	predicted protein	609	3.13				yes	yes
PTRG_05366	conserved hypothetical protein	524	0.76		FAD_binding_4	1.4e-20	yes	yes		FAD binding	fad binding domain containing protein	4	2	4
										oxidoreductase activity
PTRG_05379	expression library immunization antigen 1	219	1.83				yes	yes					8	5	10
PTRG_05383	WSC domain containing protein	487	3.09		DUF1996	1.9e-58	yes	yes					2	2
PTRG_05397	predicted protein	364	0.83		Med15	0.065	yes	yes
PTRG_05420	rhamnogalacturonan lyase	672	0.6				yes	yes	carbohydrate metabolic process	carbohydrate binding	polysaccharide lyase family 4
										lyase activity
PTRG_05425	carboxypeptidase B precursor	403	1		Peptidase_M14	9e-65	yes	yes	proteolysis	metallocarboxypeptidase activity	zinc carboxypeptidase a
PTRG_05425	carboxypeptidase B precursor	403	1		Peptidase_M14	9e-65	yes	yes	proteolysis	zinc ion binding	zinc carboxypeptidase a
PTRG_05435	cutinase precursor	254	1.58		DUF2493	0.045	yes	yes	metabolic process	cutinase activity	cutinase precursor		4
					Cutinase	6.6e-48
PTRG_05456	predicted protein	567	0.18	yes			yes	yes
PTRG_05489	mitochondrial prohibitin complex protein 1	283	0		GatB_Yqey	0.015	yes	yes							5
					Band_7	9.4e-26
PTRG_05499	predicted protein	472	0				yes	yes							2
PTRG_05510	endoglucanase IV	249	1.61		CSD	0.01	yes	yes
					Glyco_hydro_61	5.7e-66
PTRG_05570	phosphatidylinositol glycan class L	280	0.72	yes	PIG-L	7.7e-21	yes	yes
PTRG_05585	conserved hypothetical protein	257	0.78				yes	yes					2		4
PTRG_05593	predicted protein	259	7.75				yes	yes
PTRG_05596	conserved hypothetical protein	556	0.36		AA_permease	0.089	yes	yes		binding	pyrrolo-quinoline quinone
PTRG_05627	pyrroline-5-carboxylate reductase	665	1.36		F420_oxidored	0.001	yes	yes	glutamate biosynthetic process	binding	proline oxidase
					Pro_dh	5.5e-31			proline catabolic process	proline dehydrogenase activity	proline oxidase
									oxidation reduction
PTRG_05659	conserved hypothetical protein	250	2.41		CBM_1	1.8e-11	yes	yes	carbohydrate metabolic process	cellulose binding	carbohydrate-binding module family 1 protein
										hydrolase activity, hydrolyzing O-glycosyl compounds
PTRG_05672	conserved hypothetical protein	202	1.99				yes	yes					2
PTRG_05679	beta-galactosidase	1010	0.5		BetaGal_dom2	2.9e-56	yes	yes	carbohydrate metabolic process	hydrolase activity, hydrolyzing O-glycosyl compounds	beta-galactosidase b
					Glyco_hydro_35	1.5e-78				cation binding
PTRG_05683	DJ-1/PfpI family protein	262	0.77		DJ-1_PfpI	3.3e-09	yes	yes
PTRG_05688	endoglucanase 1 precursor	278	5.05		Glyco_hydro_45	1.1e-63	yes	yes	carbohydrate metabolic process	cellulase activity	beta- -endoglucanase
PTRG_05708	beta-mannanase	329	2.44		Cellulase	2.3e-16	yes	yes	carbohydrate metabolic process	hydrolase activity, hydrolyzing O-glycosyl compounds	endo- -beta-			2	4
										cation binding
PTRG_05716	glutamate carboxypeptidase 2	708	0.28		PA	3.1e-05	yes	yes	proteolysis	carboxypeptidase activity	glutamate carboxypeptidase
					TFR_dimer	5.9e-14
					Peptidase_M28	1.8e-16
PTRG_05745	conserved hypothetical protein	367	0.27				yes	yes					3	4	2
PTRG_05758	conserved hypothetical protein	204	2.96				yes	yes
PTRG_05761	alpha-glucosidase precursor	914	0.77		Glyco_hydro_31	3.8e-158	yes	yes	carbohydrate metabolic process	hydrolase activity, hydrolyzing O-glycosyl compounds	alpha-glucosidase
PTRG_05768	conserved hypothetical protein	268	1.12		GCM	0.059	yes	yes		peroxidase activity
					Peroxidase_2	2.7e-31
PTRG_05787	periplasmic beta-glucosidase precursor	759	0.92		Glyco_hydro_3_C	6.8e-57	yes	yes	carbohydrate metabolic process	hydrolase activity, hydrolyzing O-glycosyl compounds	beta-
					Glyco_hydro_3	1.4e-50
PTRG_05788	hypothetical protein	395	0.51				yes	yes							2
PTRG_05806	glycosyl hydrolase	352	0.57		Glyco_hydro_76	3.2e-43	yes	yes		hydrolase activity	glycosyl hydrolase
PTRG_05819	endoglucanase E precursor	350	0.57		Lipase_GDSL	1.9e-07	yes	yes	carbohydrate metabolic process	hydrolase activity, acting on ester bonds	lipolytic protein g-d-s-l family
									lipid metabolic process	hydrolase activity, hydrolyzing O-glycosyl compounds
										binding
PTRG_05826	conserved hypothetical protein	288	1.74		DUF3455	2.3e-35	yes	yes
PTRG_05828	conserved hypothetical protein	442	1.59		Exo_endo_phos	2.4e-08	yes	yes		nuclease activity	endonuclease exonuclease phosphatase family protein				1
					Jacalin	2.4e-08
PTRG_05854	conserved hypothetical protein	279	3.96				yes	yes
PTRG_05867	predicted protein	527	1.33		WWbp	0.027	yes	yes
PTRG_05888	conserved hypothetical protein	249	0		Lipase_GDSL	1.1e-15	yes	yes	lipid metabolic process	hydrolase activity, acting on ester bonds	fg-gap repeat domain-containing protein				2
PTRG_05897	glucose-methanol-choline oxidoreductase	404	0.5		GMC_oxred_N	5.4e-47	yes	yes	spore germination	FAD binding	glucose-methanol-choline oxidoreductase
									alcohol metabolic process	oxidoreductase activity, acting on CH-OH group of donors
PTRG_05911	hydroxyacylglutathione hydrolase	298	1.68		BcrAD_BadFG	0.029	yes	yes		zinc ion binding	hydroxyacylglutathione hydrolase		6	2	3
					Lactamase_B	1.5e-27	yes	yes		hydroxyacylglutathione hydrolase activity
PTRG_05930	cytosolic Cu/Zn superoxide dismutase	287	1.4		Sod_Cu	5.7e-14	yes	yes	oxidation reduction	metal ion binding	cytosolic cu zn superoxide dismutase
									superoxide metabolic process	superoxide dismutase activity
PTRG_05934	predicted protein	237	2.97				yes	yes
PTRG_05940	cel1 protein precursor	239	2.1		Glyco_hydro_61	4.7e-59	yes	yes
PTRG_05949	predicted protein	212	2.84				yes	yes
PTRG_05955	bacterial alpha-L-rhamnosidase domain containing protein	676	0.59		Bac_rhamnosid	0.046	yes	yes		hydrolase activity	bacterial alpha-l-rhamnosidase domain protein	2
					Bac_rhamnosid	6.7e-22
PTRG_05963	fungal cellulose binding domain containing protein	320	1.88		Glyco_hydro_61	4.9e-47	yes	yes	metabolic process	hydrolase activity, acting on glycosyl bonds	fungal cellulose binding domain-containing protein		4
PTRG_05968	protein disulfide-isomerase A4 precursor	364	1.1		ERp29	4.8e-20	yes	yes	cell redox homeostasis	isomerase activity	disulfide isomerase		4		3
					Thioredoxin	6.6e-28
					Thioredoxin	1.1e-31
PTRG_05975	conserved hypothetical protein	268	1.87				yes	yes					2		2
PTRG_05983	predicted protein	263	3.44				yes	yes
PTRG_06028	predicted protein	239	3.36		Baculo_PEP_C	0.097	yes	yes
					CFEM	3.7e-10
PTRG_06033	endoglucanase II	361	1.67		CBM_1	1e-05	yes	yes	carbohydrate metabolic process	hydrolase activity, hydrolyzing O-glycosyl compounds	endoglucanase ii
					Glyco_hydro_61	1.6e-44				cellulose binding
PTRG_06047	conserved hypothetical protein	677	0.59				yes	yes
PTRG_06049	conserved hypothetical protein	269	1.49				yes	yes					4	4	1
PTRG_06067	conserved hypothetical protein	351	2.86		DUF1996	1.4e-88	yes	yes
PTRG_06071	conserved hypothetical protein	633	1.74		REJ	0.0044	yes	yes						2	2
PTRG_06141	acetylxylan esterase precursor	229	4.39		Cutinase	1.1e-46	yes	yes	metabolic process	hydrolase activity	acetyl xylan esterase
PTRG_06147	conserved hypothetical protein	487	0.62		Fasciclin	1.8e-18	yes	yes					3	6	3
					Fasciclin	5.2e-22
PTRG_06174	conserved hypothetical protein	690	0				yes	yes		DNA binding	bnr asp-box repeat domain protein				4
PTRG_06175	fungal cellulose binding domain containing protein	271	2.22		Abhydrolase_2	1.2e-07	yes	yes		carbohydrate binding	cellulose-binding family ii	4
										hydrolase activity
PTRG_06178	conserved hypothetical protein	212	11.37		Chitin_bind_1	0.00027	yes	yes	chitin catabolic process	chitinase activity	chitin binding protein 6		2	2	2
					Chitin_bind_1	1.3e-11	yes	yes	cell wall macromolecule catabolic process	chitin binding
PTRG_06197	predicted protein	220	0.91				yes	yes
PTRG_06230	HIT domain containing protein	342	2.93		HIT	1.3e-21	yes	yes	nucleotide metabolic process	kinase activity	hit family protein 1	2	4	7	6
										hydrolase activity
										nucleotide binding
PTRG_06266	beta-hexosaminidase precursor	615	1.3		Glyco_hydro_20b	2.3e-12	yes	yes	carbohydrate metabolic process	cation binding	beta-n-acetylhexosaminidase		2	4	4
					Glyco_hydro_20	5.3e-94				beta-N-acetylhexosaminidase activity
PTRG_06273	endoglucanase II	359	1.96		CBM_1	1.4e-10	yes	yes	carbohydrate metabolic process	hydrolase activity, hydrolyzing O-glycosyl compounds	endoglucanase b				2
					Glyco_hydro_61	1.4e-46				cellulose binding
PTRG_06274	endoglucanase A precursor	239	1.26		Glyco_hydro_12	7.5e-42	yes	yes	polysaccharide catabolic process	cellulase activity	endoglucanase a precursor	*4
PTRG_06275	peptidase S41 family protein	829	1.09		Peptidase_S41	0.00024	yes	yes
PTRG_06319	endoglucanase II	245	1.64		Glyco_hydro_61	5.2e-64	yes	yes	mycelium development
PTRG_06324	acetylcholinesterase precursor	579	1.38		COesterase	3.2e-68	yes	yes	metabolic process
PTRG_06326	class I alpha-mannosidase 1A	943	0.64	yes	Glyco_hydro_47	9.7e-180	yes	yes		mannosyl-oligosaccharide 1,2-alpha-mannosidase activity	class i alpha-mannosidase 1a
										calcium ion binding
PTRG_06344	cytochrome P450 52A12	541	1.67	yes	p450	4e-49	yes	yes	oxidation reduction	heme binding	cytochrome p450 family
										oxidoreductase activity, acting on paired donors, with incorporation or reduction of molecular oxygen, reduced flavin or flavoprotein as one donor, and incorporation of one atom of oxygen
										electron carrier activity
PTRG_06364	sucrose-6-phosphate hydrolase	639	0.16		Glyco_hydro_32C	4.7e-10	yes	yes	carbohydrate metabolic process	hydrolase activity, hydrolyzing O-glycosyl compounds	glycosyl hydrolases family 32 superfamily		4		2
					Glyco_hydro_32N	1.2e-45	yes	yes
PTRG_06366	protein disulfide-isomerase	525	1.34		Thioredoxin	1.1e-27	yes	yes	cell redox homeostasis	protein disulfide isomerase activity	protein disulfide isomerase		4	6	5
					Thioredoxin	2.6e-32
PTRG_06401	feruloyl esterase B precursor	555	1.81		Tannase	2.7e-96	yes	yes	cell wall macromolecule metabolic process	carboxylesterase activity	feruloyl esterase b precursor
									polysaccharide catabolic process
PTRG_06408	ribonuclease M	408	3.44		Ribonuclease_T2	5.4e-47	yes	yes		RNA binding	ribonuclease t2		2
										ribonuclease T2 activity
PTRG_06431	predicted protein	931	0				yes	yes
PTRG_06433	acetylcholinesterase precursor	551	0.73		COesterase	2e-80	yes	yes		hydrolase activity	carboxylesterase family protein
PTRG_06434	mannoprotein MP65	438	0.92		Glyco_hydro_17	4.4e-05	yes	yes	carbohydrate metabolic process	hydrolase activity, hydrolyzing O-glycosyl compounds	cell wall glucanase
PTRG_06458	DNAJ domain containing protein	519	1.35		TPR_1	7.9e-06	yes	yes		heat shock protein binding	and tpr domain protein		2
					DnaJ	8.3e-24
					TPR_1	0.0078
PTRG_06467	predicted protein	256	1.96				yes	yes
PTRG_06484	predicted protein	284	0				yes	yes
PTRG_06505	predicted protein	295	0				yes	yes
PTRG_06523	5'-nucleotidase precursor	597	0.67		Metallophos	5.5e-10	yes	yes	nucleotide catabolic process	nucleotide binding	5 -nucleotidase precursor
					5_nucleotid_C	5e-33				hydrolase activity, acting on ester bonds
PTRG_06526	beta-galactosidase	883	0.34		Glyco_hydro_2_N	4.9e-31	yes	yes	carbohydrate metabolic process	hydrolase activity, hydrolyzing O-glycosyl compounds	beta-galactosidase	*1
					Glyco_hydro_2	1.1e-14				cation binding
					Glyco_hydro_2_C	2.8e-30
PTRG_06558	choline dehydrogenase	567	0.35		GMC_oxred_C	1.8e-27	yes	yes	alcohol metabolic process	FAD binding	choline dehydrogenase
					GMC_oxred_N	2e-48				oxidoreductase activity, acting on CH-OH group of donors
PTRG_06559	conserved hypothetical protein	268	0.75		CHRD	0.0004	yes	yes
PTRG_06574	cytochrome P450 78A3	533	1.13		Phosphoprotein	0.021	yes	yes	oxidation reduction	heme binding	cytochrome p450 78a3
					p450	3.4e-80				monooxygenase activity
										electron carrier activity
PTRG_06587	FAD binding domain containing protein	502	1		BBE	0.073	yes	yes		oxidoreductase activity	fad binding domain containing protein
					FAD_binding_4	2.3e-22				FAD binding
PTRG_06589	predicted protein	205	1.47		SnoaL_2	0.0017	yes	yes
PTRG_06593	conserved hypothetical protein	262	2.3	yes			yes	yes
PTRG_06603	hypothetical protein	364	2.48				yes	yes						2	4
PTRG_06607	conserved hypothetical protein	311	1.61				yes	yes	response to cAMP
									mycelium development
PTRG_06611	aspartic proteinase precursor	311	0.65		Asp	6.9e-22	yes	yes	proteolysis	aspartic-type endopeptidase activity	aspartic-type
PTRG_06615	conserved hypothetical protein	315	0		Abhydrolase_6	4.3e-23	yes	yes
PTRG_06616	conserved hypothetical protein	1498	0.47		KH_1	0.0013	yes	yes		RNA binding	rna binding effector protein			6	2
					KH_1	4.5e-07
					KH_1	2.8e-09
					KH_1	1.9e-10
					KH_1	1.6e-10
					KH_1	1.7e-11
					KH_1	1.1e-11
PTRG_06658	predicted protein	416	1.2				yes	yes
PTRG_06665	glutamyl-tRNA (Gln) amidotransferase subunit A	548	0.18		Amidase	1.3e-69	yes	yes		carbon-nitrogen ligase activity, with glutamine as amido-N-donor	glutamyl-trna amidotransferase subunit a
										transferase activity
PTRG_06731	L-amino-acid oxidase precursor	680	0.88		Amino_oxidase	1.1e-06	yes	yes	cellular nitrogen compound biosynthetic process	oxidoreductase activity	l-amino acid oxidase
					Amino_oxidase	3.3e-25
PTRG_06749	choline dehydrogenase, mitochondrial precursor	604	0.17		GMC_oxred_N	2.6e-55	yes	yes	alcohol metabolic process	oxidoreductase activity, acting on CH-OH group of donors	choline dehydrogenase		2
					GMC_oxred_C	2.8e-38				FAD binding
PTRG_06776	predicted protein	293	4.11		WSC	4.1e-11	yes	yes
PTRG_06778	conserved hypothetical protein	602	1.66	yes	PAN_1	0.013	yes	yes
PTRG_06780	conserved hypothetical protein	345	2.91		Cutinase	5.3e-28	yes	yes	metabolic process	hydrolase activity	acetylxylan esterase precursor
					UPF0565	0.0023
PTRG_06785	leucine rich repeat protein	305	0.66		LRR_4	0.024	yes	yes		protein binding	protein
					LRR_4	0.0017
PTRG_06788	beta-xylosidase	757	1.32		Glyco_hydro_3_C	5.8e-35	yes	yes	carbohydrate metabolic process	hydrolase activity, hydrolyzing O-glycosyl compounds	beta-xylosidase
					Glyco_hydro_3	7.9e-50
PTRG_06789	alpha-galactosidase precursor	545	1.29		Melibiase	0.073	yes	yes	carbohydrate metabolic process	hydrolase activity, hydrolyzing O-glycosyl compounds	alpha-galactosidase precursor
					Melibiase	4.3e-11
PTRG_06825	laccase-2 precursor	563	1.42		Cu-oxidase	3.6e-24	yes	yes	oxidation reduction	oxidoreductase activity	multicopper oxidase
					Cu-oxidase_2	2.9e-35				copper ion binding
					Cu-oxidase_3	1.6e-40
PTRG_06831	choline dehydrogenase	939	0.96		GMC_oxred_N	1e-33	yes	yes	carbohydrate catabolic process	cellulose binding	cellobiose dehydrogenase
					CBM_1	5.8e-11				oxidoreductase activity, acting on CH-OH group of donors
					GMC_oxred_C	1.4e-18				hydrolase activity, hydrolyzing O-glycosyl compounds
										FAD binding
PTRG_06836	amidase family protein	679	1.03		Amidase	5e-31	yes	no		carbon-nitrogen ligase activity, with glutamine as amido-N-donor	amidase family protein		2		2
PTRG_06872	metalloproteinase 6	367	2.46		Peptidase_M35	3.6e-38	yes	yes	proteolysis	metalloendopeptidase activity	neutral protease 2
PTRG_06877	beta-1,6-galactanase	469	1.71				yes	yes	carbohydrate metabolic process	hydrolase activity, hydrolyzing O-glycosyl compounds	cellulase family protein
										cation binding
PTRG_06880	predicted protein	749	0.4				yes	yes
PTRG_06883	endoglucanase II	252	1.59		Glyco_hydro_61	5.7e-69	yes	yes	interaction with host via protein secreted by type II secretion system
PTRG_06885	phosphoglycerate mutase family protein	350	2.58		His_Phos_1	1.3e-14	yes	yes
PTRG_06890	hypothetical protein	215	2.34				yes	yes				2	4	4	4
PTRG_06893	glutaminyl-peptide cyclotransferase precursor	386	0.26		Peptidase_M28	1.9e-41	yes	yes	proteolysis	transferase activity	glutaminyl cyclase
										peptidase activity
PTRG_06898	superoxide dismutase, mitochondrial precursor	250	0		Sod_Fe_C	2.9e-34	yes	yes	oxidation reduction	metal ion binding	superoxide dismutase	*2	6	5	7
					Sod_Fe_N	1.5e-34			superoxide metabolic process	superoxide dismutase activity
PTRG_06905	lipolytic enzyme	426	0.24		Lipase_GDSL	1.9e-11	yes	yes	lipid metabolic process	hydrolase activity, acting on ester bonds	extracellular gdsl-like lipase		2
PTRG_06913	conserved hypothetical protein	246	11.43				yes	yes						4	9
PTRG_06934	predicted protein	283	2.84				yes	yes
PTRG_06935	conserved hypothetical protein	452	2.66	yes	PAN_2	0.036	yes	yes		transferase activity, transferring glycosyl groups	glycosyltransferase family 31
					Fringe	4.4e-07
PTRG_06937	predicted protein	1434	1.81				yes	yes
PTRG_06938	arabinogalactan endo-1,4-beta-galactosidase	624	0.64	yes	F5_F8_type_C	1.4e-21	yes	yes	cell adhesion
					DUF1929	1.1e-24
					Kelch_1	0.0006
					Glyoxal_oxid_N	0.0012
					Kelch_1	0.0048
					Kelch_1	0.0074
PTRG_06939	choline dehydrogenase	608	0.49		GMC_oxred_N	3.2e-50	yes	yes	alcohol metabolic process	oxidoreductase activity, acting on CH-OH group of donors	choline dehydrogenase
					GMC_oxred_C	1.7e-41			spore germination	FAD binding
PTRG_06944	arabinofuranosidase/B-xylosidase precursor	502	1.6		AbfB	8.5e-58	yes	yes	xylan catabolic process	alpha-N-arabinofuranosidase activity	fungal alpha-l-
					ArabFuran-catal	2e-165	yes	yes	xylan catabolic process	xylan 1,4-beta-xylosidase activity
									arabinan metabolic process
									L-arabinose metabolic process
PTRG_06962	endochitinase 1 precursor	428	0.23		Glyco_hydro_18	1.5e-90	yes	yes	chitin catabolic process	cation binding	class v chitinase 1			3
										chitinase activity
										chitin binding
PTRG_07020	hypothetical protein	273	1.84				yes	yes					6
PTRG_07027	hypothetical protein	250	0.8		Isochorismatase	1.8e-17	yes	yes	metabolic process	catalytic activity	protein ycac				2
PTRG_07033	lipase precursor	284	2.12		Lipase3_N	0.00041	yes	yes	lipid catabolic process	triglyceride lipase activity	lipase precursor
					Lipase_3	1.6e-34
PTRG_07043	beta-glucosidase 2 precursor	870	0.81		Glyco_hydro_3_C	5.6e-56	yes	yes	carbohydrate metabolic process	hydrolase activity, hydrolyzing O-glycosyl compounds	beta-glucosidase 2 precursor
					Glyco_hydro_3	2.8e-77
PTRG_07053	hypothetical protein	645	0.31		bZIP_2	0.021	yes	yes	regulation of transcription, DNA-dependent	transcription factor activity			2
										sequence-specific DNA binding
PTRG_07068	tripeptidyl-peptidase 1 precursor	610	1.15		Peptidase_S8	5e-10	yes	yes	proteolysis	serine-type endopeptidase activity	tripeptidyl peptidase				4
					Pro-kuma_activ	7.8e-43
PTRG_07078	mixed-linked glucanase precursor	341	2.65		Glyco_hydro_16	7.6e-08	yes	yes	carbohydrate metabolic process	hydrolase activity, hydrolyzing O-glycosyl compounds	endo- -beta-
PTRG_07086	predicted protein	342	3.23		PAN_3	0.077	yes	yes
PTRG_07117	N-acetylated-alpha-linked acidic dipeptidase 2	709	0.42		PA	0.0002	yes	yes	proteolysis	peptidase activity	glutamate carboxypeptidase
					Peptidase_M28	3.9e-17
					TFR_dimer	3.9e-19
PTRG_07122	alpha-1,2-mannosidase family protein	758	0.92	yes	Glyco_hydro_92	2.8e-143	yes	yes	pathogenesis					1
PTRG_07124	conserved hypothetical protein	352	0.57		DUF946	2.4e-16	yes	yes
PTRG_07137	predicted protein	394	0				yes	yes
PTRG_07175	glyoxal oxidase	826	3.88		Chitin_bind_1	4.8e-06	yes	yes	cell wall macromolecule catabolic process	chitinase activity	glyoxal oxidase		8	12	2
					DUF1929	4.2e-24			chitin catabolic process	chitin binding
					Glyoxal_oxid_N	5e-38
					Chitin_bind_1	6.2e-06
					Chitin_bind_1	0.0013
PTRG_07181	FAD binding domain containing protein	654	1.38	yes	BBE	7e-10	yes	yes		oxidoreductase activity	fad binding domain containing protein
					FAD_binding_4	2.6e-17				FAD binding
PTRG_07220	conserved hypothetical protein	516	1.75		Peptidase_S28	1.7e-09	yes	yes	proteolysis	serine-type peptidase activity	extracelular serine carboxypeptidase				2
					Peptidase_S28	2.8e-25
PTRG_07223	endoglucanase D precursor	576	0.35		DUF291	8.6e-21	yes	yes	carbohydrate metabolic process	hydrolase activity, hydrolyzing O-glycosyl compounds	endoglucanase b
					Cellulase	2.1e-40				cation binding
PTRG_07243	acetylcholinesterase precursor	528	1.33		COesterase	8.2e-71	yes	yes		hydrolase activity	carboxylesterase
PTRG_07247	conserved hypothetical protein	412	1.46		CAP59_mtransfer	1.7e-85	yes	yes					2	2
PTRG_07250	endochitinase 2 precursor	1218	0.82		Glyco_hydro_18	1.3e-06	yes	yes	carbohydrate metabolic process	hydrolase activity, hydrolyzing O-glycosyl compounds	class iii chitinase 1			2	2
										cation binding
PTRG_07260	predicted protein	292	3.78				yes	yes
PTRG_07261	alkaline phosphatase precursor	658	1.07		Alk_phosphatase	5.2e-69	yes	yes	metabolic process	phosphatase activity	alkaline phosphatase
PTRG_07269	conserved hypothetical protein	418	1.92	yes	DUF3431	9e-87	yes	yes
PTRG_07272	conserved hypothetical protein	312	3.22		DUF1996	9.8e-75	yes	yes
PTRG_07274	conserved hypothetical protein	710	0.99				yes	yes
PTRG_07291	conserved hypothetical protein	349	3.45		DUF1996	2.2e-77	yes	yes
PTRG_07292	conserved hypothetical protein	275	0.73		Abhydrolase_5	5.2e-08	yes	yes				10
PTRG_07312	arabinogalactan endo-1,4-beta-galactosidase	532	1.13		RhgB_N	6.6e-103	yes	yes	carbohydrate metabolic process	carbohydrate binding	rhamnogalacturonase b			1
										carbon-oxygen lyase activity, acting on polysaccharides
PTRG_07335	anaphase-promoting complex protein	747	1.07		Apc5	4.4e-30	yes	yes
PTRG_07350	3-carboxymuconate cyclase	384	1.31		Lactonase	4.3e-66	yes	yes
PTRG_07362	repressible acid phosphatase	442	1.81		His_Phos_2	6.6e-26	yes	yes		acid phosphatase activity	histidine acid		2		3
PTRG_07411	cytochrome P450 2E1	600	1		p450	2.6e-45	yes	yes	oxidation reduction	heme binding	cytochrome p450 2e1			6
										monooxygenase activity
										electron carrier activity
PTRG_07415	cutinase precursor	261	1.15		Cutinase	4.6e-12	yes	yes	metabolic process	cutinase activity	cutinase
PTRG_07416	FAD binding domain containing protein	430	1.63		FAD_binding_3	2.4e-24	yes	yes	oxidation reduction	monooxygenase activity	fad binding domain protein
PTRG_07421	cytochrome P450 4F3 omega-hydroxylase	488	0.62	yes	p450	4.6e-66	yes	yes	oxidation reduction	heme binding	benzoate 4-monooxygenase cytochrome p450
										monooxygenase activity
										electron carrier activity
PTRG_07425	FAD binding domain containing protein	487	0.62		BBE	1.4e-06	yes	yes		FAD binding	fad binding domain protein
					FAD_binding_4	1.9e-22				oxidoreductase activity
PTRG_07433	Cip1	226	1.78				yes	yes		hydrolase activity	secreted hydrolase
										polysaccharide binding
PTRG_07436	hypothetical protein	351	0.29		Cyt-b5	3.1e-16	yes	yes		oxidoreductase activity	heme steroid binding
										heme binding
PTRG_07457	carbonic anhydrase	310	0.97		Carb_anhydrase	7.1e-25	yes	yes	one-carbon metabolic process	zinc ion binding	carbonic anhydrase
										carbonate dehydratase activity
PTRG_07467	predicted protein	407	0.49				yes	yes
PTRG_07485	fungal cellulose binding domain containing protein	231	0.87		Glyco_hydro_61	4e-66	yes	yes
PTRG_07520	conserved hypothetical protein	209	0.96				yes	yes
PTRG_07562	FAS1 domain-containing protein	207	0.49		Fasciclin	0.026	yes	yes
PTRG_07618	predicted protein	913	0.44				yes	yes
PTRG_07637	mitochondrial deoxynucleotide carrier	323	0		Mito_carr	5.7e-20	yes	yes	transmembrane transport	binding	mitochondrial deoxynucleotide carrier
					Mito_carr	2.7e-22				transporter activity
PTRG_07653	fumarate reductase	637	0.63	yes	IF2_N	0.011	yes	yes	oxidation reduction	heme binding	fumarate reductase		2
					Cyt-b5	3.7e-17				succinate dehydrogenase activity
					FAD_binding_2	3.4e-82				electron carrier activity
										fumarate reductase (NADH) activity
PTRG_07662	endoplasmic oxidoreductin-1 precursor	602	2.66		ERO1	2e-136	yes	yes	oxidation reduction	protein binding	endoplasmic oxidoreductin-1		4	2
									protein thiol-disulfide exchange	FAD binding
										oxidoreductase activity, acting on sulfur group of donors, disulfide as acceptor
PTRG_07663	peptidase S41 family protein	758	0.92		Peptidase_S41	1.3e-06	yes	yes	proteolysis	serine-type peptidase activity	peptidase s41 family protein			4
PTRG_07669	predicted protein	290	0		Peptidase_S51	2.2e-13	yes	yes	proteolysis	serine-type peptidase activity	cyanophycinase
PTRG_07675	cytochrome P450 3A30	531	1.51	yes	p450	5.1e-58	yes	yes	oxidation reduction	heme binding	cytochrome p450	2	2
										monooxygenase activity
										electron carrier activity
PTRG_07701	conserved hypothetical protein	531	1.13		DAO	9.8e-30	yes	yes		oxidoreductase activity	fad dependent		1		1
PTRG_07721	conserved hypothetical protein	256	0.78		Spherulin4	4.6e-55	yes	yes
PTRG_07722	HET domain containing protein	638	1.26		HET	9.5e-07	yes	yes
PTRG_07728	conserved hypothetical protein	531	1.51		PRKCSH	1.3e-18	yes	yes		protein binding	misfolded glycoproteins degradation protein
PTRG_07756	blue copper oxidase cueO precursor	585	0.17		Cu-oxidase	0.00032	yes	yes	developmental maturation	copper ion binding	bilirubin oxidase
					Cu-oxidase_3	6.2e-21			response to cAMP	oxidoreductase activity
					Cu-oxidase_2	1.9e-21			oxidation reduction
PTRG_07762	beta-glucosidase 5	638	2.04				yes	yes					4	5
PTRG_07783	conserved hypothetical protein	652	1.54		SGL	0.049	yes	yes	carbohydrate catabolic process	carbohydrate binding	cellobiose dehydrogenase
										catalytic activity
PTRG_07822	alpha-L-arabinofuranosidase precursor	356	1.41		Glyco_hydro_62	1.9e-68	yes	yes	L-arabinose metabolic process	cellulose binding	glycosyl hydrolase family 62 protein
										alpha-N-arabinofuranosidase activity
PTRG_07828	peptidase	907	0.99		DUF1034	3.8e-13	yes	yes	proteolysis	serine-type endopeptidase activity	subtilisin-like serine protease pr1c
					Peptidase_S8	6.9e-51
					PA	0.04
PTRG_07848	conserved hypothetical protein	282	0.71	yes	Glyco_transf_34	3.1e-24	yes	yes		transferase activity, transferring hexosyl groups	alpha- -galactosyltransferase
PTRG_07849	conserved hypothetical protein	501	1.4				yes	yes				2
PTRG_07851	protein disulfide-isomerase MPD1 precursor	500	1.4		Thioredoxin	0.00065	yes	yes	cell redox homeostasis	protein disulfide isomerase activity	disulfide isomerase		2		2
					Thioredoxin	5.5e-25
PTRG_07863	conserved hypothetical protein	271	1.11		Glyco_hydro_cc	4.5e-63	yes	yes						2	2
PTRG_07903	conserved hypothetical protein	309	0.97		RE_NgoFVII	0.093	yes	yes					2
PTRG_07907	cytochrome P450 4A10	389	0.77		p450	2.6e-40	yes	yes	oxidation reduction	heme binding	cytochrome p450 4a10
										monooxygenase activity
										electron carrier activity
PTRG_07914	conserved hypothetical protein	452	0.22		DHH	4.2e-10	yes	yes		manganese ion binding	exopolyphosphatase
										mannosyl-oligosaccharide 1,2-alpha-mannosidase activity
										calcium ion binding
PTRG_07966	predicted protein	586	0				yes	yes
PTRG_07989	conserved hypothetical protein	220	2.74				yes	yes					4
PTRG_08021	predicted protein	245	8.61	yes			yes	yes
PTRG_08089	conserved hypothetical protein	214	0		GPI-anchored	1.1e-09	yes	yes
PTRG_08099	lipid binding protein	246	1.22		PBP	2.1e-31	yes	yes
PTRG_08103	conserved hypothetical protein	482	0.42		Amino_oxidase	0.014	yes	yes
					HI0933_like	0.0008
PTRG_08105	oryzin precursor	474	1.06		Peptidase_S8	2.8e-37	yes	yes	proteolysis	serine-type endopeptidase activity	serine protease
PTRG_08122	ribonuclease T2 precursor	327	3.07		Ribonuclease_T2	6.3e-32	yes	yes	pathogenesis	ribonuclease T2 activity	ribonuclease t2			2
									ascospore formation	RNA binding
PTRG_08129	pisatin demethylase	497	1.21	yes	p450	7.5e-71	yes	yes	oxidation reduction	monooxygenase activity	pisatin demethylase				4
										electron carrier activity
										methyltransferase activity
										heme binding
PTRG_08134	glycosyl hydrolase	767	1.04		GSPII_F	0.074	yes	yes		hydrolase activity	glycosyl hydrolase
					Glyco_hydro_92	4.2e-124
PTRG_08165	glutaminyl-peptide cyclotransferase precursor	373	0.27		Peptidase_M28	3.7e-40	yes	yes	proteolysis	transferase activity	glutaminyl-peptide cyclotransferase
										peptidase activity
PTRG_08170	leupeptin-inactivating enzyme 1 precursor	499	0.8		PA	8.2e-15	yes	yes	proteolysis	peptidase activity	leucine aminopeptidase 1
					Peptidase_M28	5.7e-31
PTRG_08174	ser/Thr protein phosphatase family	622	0.81		Metallophos	6.3e-10	yes	yes	nucleotide catabolic process	hydrolase activity	ser thr protein phosphatase family			1
PTRG_08196	rhamnogalacturonan acetylesterase precursor	269	1.49		Lipase_GDSL	5.5e-09	yes	yes	lipid metabolic process	hydrolase activity, acting on ester bonds	rhamnogalacturonan acetylesterase		1		2
PTRG_08200	conserved hypothetical protein	369	4.35		Chitin_bind_1	5.7e-05	yes	yes		chitin binding	chitin binding protein
PTRG_08208	predicted protein	279	2.16		CFEM	0.0018	yes	yes
PTRG_08228	peptidase	802	1.25		Peptidase_S8	5.7e-16	yes	yes	response to cAMP	serine-type endopeptidase activity	subtilisin-like serine protease pr1c
					PA	6.1e-12	yes	yes	proteolysis
					DUF1034	2.4e-14	yes	yes
					Peptidase_S8	1.8e-13	yes	yes
PTRG_08229	conserved hypothetical protein	534	0.94		Pkinase	5.3e-05	yes	yes	protein amino acid phosphorylation	ATP binding
										protein kinase activity
PTRG_08253	predicted protein	319	2.83		Astacin	0.0051	yes	yes
PTRG_08257	cytochrome P450 52A12	507	1.78	yes	p450	2.5e-64	yes	yes	oxidation reduction	electron carrier activity	cytochrome p450 alkane			2
										heme binding
										oxidoreductase activity, acting on paired donors, with incorporation or reduction of molecular oxygen, reduced flavin or flavoprotein as one donor, and incorporation of one atom of oxygen
PTRG_08260	conserved hypothetical protein	526	0.57				yes	yes
PTRG_08262	glucosidase 2 subunit beta precursor	564	2.84		PRKCSH	6.8e-09	yes	yes		protein binding	protein kinase c substrate				2
					PRKCSH-like	3.4e-16
					PRKCSH-like	3.5e-24
PTRG_08300	predicted protein	341	2.65				yes	yes
PTRG_08331	6-phosphogluconolactonase	390	0.51		Lactonase	1.4e-85	yes	yes				3
PTRG_08332	glucooligosaccharide oxidase	493	0.81		BBE	4.7e-15	yes	yes		oxidoreductase activity	glucooligosaccharide oxidase	4
					FAD_binding_4	1.9e-23				FAD binding
PTRG_08346	acetyl-lysine deacetylase	413	0.24		Peptidase_M20	6e-17	yes	yes	proteolysis	protein binding	acetylornithine deacetylase
					M20_dimer	5.5e-18				metallopeptidase activity
PTRG_08356	acid trehalase	1014	0.69		F5_F8_type_C	0.00012	yes	yes	carbohydrate metabolic process	carbohydrate binding	acid trehalase
					Glyco_hydro_65N	3.7e-30				catalytic activity
					Glyco_hydro_65m	9.8e-74
					Glyco_hydro_65C	0.013
PTRG_08362	cytochrome P450 67	504	1.59		p450	2.1e-51	yes	yes	oxidation reduction	heme binding	cytochrome p450 67
										monooxygenase activity
										electron carrier activity
PTRG_08369	conserved hypothetical protein	419	0		Ish1	0.00062	yes	yes						2
					Ish1	2.6e-09
					Ish1	2.6e-14
					Ish1	4.3e-15
PTRG_08382	aldose 1-epimerase	382	1.05		Aldose_epim	1.1e-47	yes	yes	hexose metabolic process	carbohydrate binding	aldose 1-epimerase
										isomerase activity
PTRG_08404	predicted protein	280	1.43				yes	yes
PTRG_08421	exo-beta 1,3 glucanase	788	1.14		Pectate_lyase_3	1.4e-66	yes	yes	metabolic process	glucan 1,3-beta-glucosidase activity	exo-beta- -
					End_N_terminal	0.055			cellular cell wall organization
					Pectate_lyase_3	6.9e-23
					End_N_terminal	0.00069
PTRG_08443	beta-1,3-mannanase	378	2.12		Cellulase	0.033	yes	yes	carbohydrate metabolic process	hydrolase activity, hydrolyzing O-glycosyl compounds	glycoside hydrolase family 5 protein	*2	2
					Cellulase	0.0027
PTRG_08465	extracellular serine-threonine rich protein	672	2.98		CFEM	1.6e-08	yes	yes							2
PTRG_08468	acetylcholinesterase precursor	537	1.49		COesterase	4.8e-39	yes	yes		hydrolase activity	carboxylesterase family protein	1
PTRG_08468	acetylcholinesterase precursor	537	1.49		COesterase	1.8e-41	yes	yes		hydrolase activity	carboxylesterase family protein	1
PTRG_08475	conserved hypothetical protein	694	1.3		C1_1	0.00054	yes	yes	cellular response to heat	protein binding	phd finger containing protein phf1
					EamA	1.7e-07			histone H3-K9 demethylation	zinc ion binding
					PHD	2.3e-09				catalytic activity
										nucleosome binding
PTRG_08485	major royal jelly protein	419	0		MRJP	7.3e-30	yes	yes							2
PTRG_08489	chitin binding protein	511	5.49		Chitin_bind_1	0.00051			chitin catabolic process	chitinase activity	chitin binding protein		1		2
					Chitin_bind_1	0.00014			cell wall macromolecule catabolic process	hydrolase activity, acting on carbon-nitrogen (but not peptide) bonds
					Chitin_bind_1	2.5e-06				chitin binding
					Polysacc_deac_1	1.9e-27
PTRG_08511	conserved hypothetical protein	359	3.35		DUF1996	2.5e-92	yes	yes					2
PTRG_08512	choline dehydrogenase	647	0.77		GMC_oxred_N	6.6e-28	yes	yes	alcohol metabolic process	FAD binding	choline dehydrogenase
					GMC_oxred_C	2.2e-29				oxidoreductase activity, acting on CH-OH group of donors
					Pyr_redox_2	0.0072
PTRG_08551	stress response protein Rds1	507	0.79				yes	yes
PTRG_08602	conserved hypothetical protein	240	0.42	yes			yes	yes						6
PTRG_08635	short chain dehydrogenase/reductase	282	0.36		adh_short	5e-17	yes	yes	oxidation reduction	binding	short chain dehydrogenase reductase		4		2
										oxidoreductase activity
PTRG_08685	oryzin precursor	409	0.25		Inhibitor_I9	2.9e-13	yes	yes	negative regulation of catalytic activity	identical protein binding	alkaline serine protease alp1
					Peptidase_S8	3.1e-41			proteolysis	serine-type endopeptidase activity
PTRG_08689	conserved hypothetical protein	1666	1.08		rve	1.1e-07	yes	yes	DNA integration	DNA binding					2
					RVT_2	3.9e-11
					Ank_2	1.9e-13
PTRG_08700	conserved hypothetical protein	510	0.98				yes	yes
PTRG_08728	conserved hypothetical protein	667	1.2	yes			yes	yes						4
PTRG_08734	cholinesterase precursor	544	0.92		COesterase	1.4e-07	yes	yes		hydrolase activity	carboxylesterase
					COesterase	6.8e-74
PTRG_08765	CaaX farnesyltransferase alpha subunit	353	0		PPTA	6.3e-09	yes	yes	protein amino acid prenylation	protein prenyltransferase activity	farnesyltransferase alpha subunit ram2			1
					PPTA	4.4e-10
					PPTA	0.00049
					PPTA	1.3e-06
					PPTA	9e-06
PTRG_08785	endo-1,4-beta-xylanase precursor	354	1.42		Glyco_hydro_10	4.7e-97	yes	yes	xylan catabolic process	hydrolase activity, hydrolyzing O-glycosyl compounds	endo- -beta-xylanase precursor			2
										cation binding
PTRG_08798	conserved hypothetical protein	208	0.48		efhand	0.00038	yes	yes					2
PTRG_08823	endoglucanase B	481	2.71		Glyco_hydro_61	3.4e-42	yes	yes	spore germination
PTRG_08833	conserved hypothetical protein	239	1.26		Cu_bind_like	0.00081	yes	yes	mycelium development
PTRG_08837	glycolipid-anchored surface protein 5 precursor	484	1.86		Glyco_hydro_72	3.6e-114	yes	yes
PTRG_08860	FAD binding domain containing protein	496	0.61		FAD_binding_4	2e-23	yes	yes		oxidoreductase activity	fad binding domain containing protein		1	6	6
										FAD binding
PTRG_08866	glucoamylase I precursor	526	0.38		Glyco_hydro_15	1.2e-66	yes	yes	polysaccharide metabolic process	glucan 1,4-alpha-glucosidase activity	glucoamylase		2
PTRG_08870	conserved hypothetical protein	246	2.45				yes	yes
PTRG_08873	endo-1,4-beta-xylanase I precursor	228	0.88		Glyco_hydro_11	1.6e-82	yes	yes	xylan catabolic process	endo-1,4-beta-xylanase activity	glycosyl hydrolase family 11	*2
PTRG_08897	conserved hypothetical protein	418	2.4		Tyrosinase	1.5e-45	yes	yes	metabolic process	metal ion binding	tyrosinase central domain protein				2
										oxidoreductase activity
PTRG_08899	conserved hypothetical protein	232	5.19	yes	GILT	3.7e-12	yes	yes					2		2
PTRG_08926	arginase family protein	370	0.81		Arginase	2.5e-75	yes	yes		metal ion binding	arginase family protein
										agmatinase activity
PTRG_08931	hypothetical protein	548	1.1		DUF1237	3.9e-180	yes	yes		catalytic activity	duf1237 domain protein
PTRG_08964	glycolipid 2-alpha-mannosyltransferase	405	1.73	yes	Glyco_transf_15	2e-143	yes	yes	protein amino acid glycosylation	glycolipid 2-alpha-mannosyltransferase activity	glycolipid 2-alpha-mannosyltransferase
PTRG_08986	FAD binding domain containing protein	658	1.22		BBE	4.3e-11	yes	yes		FAD binding	fad binding domain containing protein
					FAD_binding_4	1.1e-15				oxidoreductase activity
PTRG_09019	conserved hypothetical protein	466	1.51				yes	yes				2		2
PTRG_09020	leupeptin-inactivating enzyme 1 precursor	515	0.97		PA	2.4e-13	yes	yes	proteolysis	peptidase activity	aminopeptidase y
					Peptidase_M28	1.3e-28				mannosyl-oligosaccharide 1,2-alpha-mannosidase activity
										calcium ion binding
PTRG_09021	seprase	780	0		Peptidase_S9	1.5e-36	yes	yes	proteolysis	serine-type endopeptidase activity	extracellular dipeptidyl-peptidase dpp4
					KOG2701	0.052
					DPPIV_N	1.5e-100
PTRG_09037	exoglucanase 1 precursor	459	3.93		Glyco_hydro_7	4.9e-201	yes	yes	cellulose catabolic process	cellulose 1,4-beta-cellobiosidase activity	exoglucanase 1 precursor	*10
PTRG_09074	conserved hypothetical protein	295	2.04		Chitin_bind_3	9.6e-15	yes	yes
PTRG_09081	choline dehydrogenase	603	1		Peptidase_S15	0.069	yes	yes	alcohol metabolic process	oxidoreductase activity, acting on CH-OH group of donors	choline dehydrogenase				2
					GMC_oxred_C	4.5e-43				FAD binding
					GMC_oxred_N	6.4e-58
PTRG_09084	conserved hypothetical protein	483	2.28		Alpha-L-AF_C	0.0028	yes	yes	sphingolipid metabolic process	cation binding	endo- -beta-d-glucanase
					Glyco_hydro_30	1.3e-15			lysosome organization	glucosylceramidase activity
									carbohydrate metabolic process
PTRG_09085	FAD binding domain containing protein	620	0.97		BBE	1.5e-10	yes	yes		oxidoreductase activity	fad binding domain containing protein
					FAD_binding_4	1.4e-19				FAD binding
PTRG_09090	acid phosphatase precursor	354	0.28		SurE	2.6e-37	yes	yes		hydrolase activity	acid phosphatase
PTRG_09093	alpha-1,3-mannosyltransferase CMT1	438	1.83	yes	CAP59_mtransfer	2.7e-66	yes	yes		transferase activity, transferring glycosyl groups	alpha- -mannosyltransferase cmt1
PTRG_09100	cytochrome P450 3A31	538	1.49	yes	p450	5.7e-63	yes	yes	oxidation reduction	monooxygenase activity	benzoate 4-monooxygenase cytochrome p450
										electron carrier activity
										DNA binding
										zinc ion binding
										heme binding
PTRG_09106	conserved hypothetical protein	278	0.72		Abhydrolase_6	1.2e-24	yes	yes					2	2	13
PTRG_09143	hypothetical protein	219	0	yes			yes	yes	cellular biosynthetic process	nucleotide binding	dna polymerase iii subunit gamma tau				2
										catalytic activity
PTRG_09147	predicted protein	243	3.31				yes	yes
PTRG_09150	aspergillopepsin A precursor	419	0.96		Asp	7.2e-35	yes	yes	proteolysis	aspartic-type endopeptidase activity	aspergillopepsin a precursor		2
PTRG_09191	NADPH-cytochrome P450 reductase	697	0.57	yes	DUF685	0.021	yes	yes	oxidation reduction	electron carrier activity	nadph cytochrome p450 reductase		1	3
					NAD_binding_1	3e-19				NADPH-hemoprotein reductase activity
					Flavodoxin_1	7.3e-32				iron ion binding
					FAD_binding_1	2.3e-57				FMN binding
PTRG_09225	conserved hypothetical protein	419	1.2				yes	yes
PTRG_09240	cellulose-binding protein	246	0.82		Lipase_GDSL	1.5e-06	yes	yes	lipid metabolic process	hydrolase activity, acting on ester bonds	cellulose-binding family ii				2
PTRG_09257	predicted protein	293	1.71				yes	yes
PTRG_09291	conserved hypothetical protein	296	2.37		Tyrosinase	1e-41	yes	yes	metabolic process	oxidoreductase activity	tyrosinase central domain protein
PTRG_09330	ankyrin repeat domain containing protein	1004	1.3		Ank_2	1.3e-18	yes	yes							4
					Ank	7.9e-05
					Ank_2	1.4e-08
					Ank	0.00029
					AAA	0.0015
					DUF3336	0.069
					Ank_2	3e-17
					Ank	0.00011
PTRG_09347	conserved hypothetical protein	356	3.38		Cutinase	1.4e-23	yes	yes	metabolic process	hydrolase activity	acetylxylan esterase precursor		2		2
PTRG_09348	alpha-mannosidase IC	584	1.72	yes	Glyco_hydro_47	1.1e-148	yes	yes		calcium ion binding	alpha-mannosidase ic
										mannosyl-oligosaccharide 1,2-alpha-mannosidase activity
PTRG_09360	predicted protein	239	2.52				yes	yes
PTRG_09363	carboxypeptidase B precursor	546	0.73		Peptidase_M14	1.9e-62	yes	yes	proteolysis	metallocarboxypeptidase activity	zinc carboxypeptidase			4	1
										zinc ion binding
PTRG_09394	class I alpha-mannosidase 1A	555	0.9	yes	Glyco_hydro_47	2.5e-174	yes	yes		calcium ion binding	class i alpha-mannosidase
										mannosyl-oligosaccharide 1,2-alpha-mannosidase activity
PTRG_09399	ubiquitin carboxyl-terminal hydrolase 7	1541	2.21		DUF3517	9.4e-21	yes	yes	ubiquitin-dependent protein catabolic process	ubiquitin thiolesterase activity	ubiquitin carboxyl-terminal hydrolase
PTRG_09399	ubiquitin carboxyl-terminal hydrolase 7	1541	2.21		UCH	4.2e-41	yes	yes	ubiquitin-dependent protein catabolic process	ubiquitin thiolesterase activity	ubiquitin carboxyl-terminal hydrolase
PTRG_09401	predicted protein	516	0.78				yes	yes
PTRG_09404	GPI-anchored cell wall beta-1,3-endoglucanase EglC	458	0.88		Glyco_hydro_53	0.011	yes	yes		glucosidase activity	gpi-anchored cell wall beta- -endoglucanase
PTRG_09414	beta-glucosidase 1 precursor	740	0.95		Glyco_hydro_3_C	9.9e-62	yes	yes	carbohydrate metabolic process	hydrolase activity, hydrolyzing O-glycosyl compounds	beta-d-glucoside glucohydrolase
					Glyco_hydro_3	5.3e-67
					DUF1234	0.082
PTRG_09430	cytochrome P450 51	504	1.39	yes	p450	6.6e-63	no	yes		electron carrier activity	14-alpha sterol demethylase
										heme binding
										monooxygenase activity
PTRG_09446	cellobiose dehydrogenase	864	1.27		CBM_1	1.3e-12	yes	yes	carbohydrate catabolic process	hydrolase activity, hydrolyzing O-glycosyl compounds	cellobiose dehydrogenase	*2
					GMC_oxred_C	3.9e-18				cellulose binding
					GMC_oxred_N	2.7e-29				oxidoreductase activity, acting on CH-OH group of donors
										FAD binding
PTRG_09471	conserved hypothetical protein	342	2.35		DUF1996	1.1e-87	yes	yes
PTRG_09479	conserved hypothetical protein	278	2.17		adh_short	3.2e-05	yes	yes	metabolic process	oxidoreductase activity	retinol dehydrogenase 8
										binding
PTRG_09499	conserved hypothetical protein	527	1.14		PSI_PSAK	0.042	yes	yes	oxidation reduction	heme binding	l-ascorbate oxidase
					peroxidase	1.9e-20			response to oxidative stress	peroxidase activity
PTRG_09503	alpha-N-arabinofuranosidase A precursor	680	0.59		Alpha-L-AF_C	3.9e-27	yes	yes	L-arabinose metabolic process	alpha-N-arabinofuranosidase activity	alpha-l-arabinofuranosidase a
PTRG_09505	alpha-galactosidase precursor	448	1.12		Melibiase	0.09	yes	yes	carbohydrate metabolic process	cation binding	alpha-galactosidase
					Melibiase	1e-15				alpha-galactosidase activity
PTRG_09506	hypothetical protein	743	0.27		Rap1_C	0.072	yes	yes		catalytic activity	alpha-l-fucosidase
PTRG_09513	conserved hypothetical protein	342	0.88				yes	yes
PTRG_09525	conserved hypothetical protein	354	1.98	yes	zf-C3HC4	0.025	yes	yes		metal ion binding	conserved hypothetical protein [Pyrenophora tritici-repentis Pt-1C-BFP]
PTRG_09527	conserved hypothetical protein	398	1.26				yes	yes
PTRG_09530	endo-1,4-beta-xylanase precursor	330	1.22		Glyco_hydro_10	1.8e-100	yes	yes	xylan catabolic process	cation binding	glycosyl hydrolase family 10 protein	*3
										endo-1,4-beta-xylanase activity
PTRG_09534	arabinosidase	343	0		Glyco_hydro_43	3.4e-05	yes	yes	carbohydrate metabolic process	hydrolase activity, hydrolyzing O-glycosyl compounds	glycoside hydrolase family 43
PTRG_09537	hypothetical protein	206	1.46		C1-set	0.094	yes	yes						2	6
PTRG_09544	fungal cellulose binding domain containing protein	212	1.9		Glyco_hydro_61	4.4e-32	yes	yes		hydrolase activity	fungal cellulose binding domain protein	2	2
PTRG_09551	WD repeat containing protein 26	1335	1.35		WD40	0.031	yes	yes	carbohydrate metabolic process	hydrolase activity, hydrolyzing O-glycosyl compounds	wd domain-containing protein
					WD40	0.0078				cation binding
					WD40	0.0003
					WD40	7.1e-07
					Glyco_hydro_1	6.4e-96
PTRG_09569	conserved hypothetical protein	226	0.89				yes	yes
PTRG_09580	predicted protein	459	1.97				yes	yes
PTRG_09617	acid phosphatase PHO12 precursor	493	1.83		His_Phos_2	1.5e-24	yes	yes		acid phosphatase activity	histidine acid				2
PTRG_09645	endo-alpha-1,5-arabinanase precursor	320	2.19		Glyco_hydro_43	2e-29	yes	yes	carbohydrate metabolic process	hydrolase activity, hydrolyzing O-glycosyl compounds	extracellular endo- -alpha-l-
PTRG_09648	conserved hypothetical protein	369	1.63		Abhydrolase_6	2.4e-18	yes	yes
PTRG_09649	FAD binding domain containing protein	499	1.2		BBE	0.0003	yes	yes		FAD binding	fad binding domain-containing protein
					FAD_binding_4	1.5e-22	yes	yes		oxidoreductase activity
PTRG_09652	O-methyltransferase A	470	1.49		Methyltransf_2	9.1e-30	yes	yes		O-methyltransferase activity	o-		2
PTRG_09700	para-nitrobenzyl esterase	576	1.22		COesterase	1.4e-88	yes	yes		hydrolase activity	carboxylesterase family protein				2
PTRG_09701	monoxygenase	427	0.94		FAD_binding_3	0.00063	yes	yes	oxidation reduction	monooxygenase activity	fad binding domain protein
					FAD_binding_3	4.8e-08			pathogenesis
PTRG_09742	conserved hypothetical protein	210	2.87		CAP	6e-20	yes	yes
PTRG_09750	choline dehydrogenase	633	0.32		GMC_oxred_C	8.7e-33	yes	yes	alcohol metabolic process	FAD binding	choline dehydrogenase
					GMC_oxred_N	3.6e-51			spore germination	oxidoreductase activity, acting on CH-OH group of donors
PTRG_09751	conserved hypothetical protein	304	0.33		ADC	0.00097	yes	yes				2
PTRG_09754	lipase 3 precursor	537	0.93		COesterase	9.2e-95	yes	yes		hydrolase activity	carboxylesterase family protein
PTRG_09755	pisatin demethylase	518	0.58	yes	p450	6e-49	yes	yes	oxidation reduction	heme binding	pisatin demethylase		2		2
										monooxygenase activity
										electron carrier activity
										methyltransferase activity
PTRG_09758	conserved hypothetical protein	287	0.7				yes	yes	interaction with host via protein secreted by type II secretion system				2
PTRG_09764	glycosyl hydrolase	768	1.56		Polysacc_deac_1	2.4e-14	yes	yes	carbohydrate metabolic process	hydrolase activity, acting on carbon-nitrogen (but not peptide) bonds	polysaccharide deacetylase			2
PTRG_09784	50S ribosomal subunit protein L15	328	0.31		Ribosomal_L18e	3.9e-12	yes	yes	translation	structural constituent of ribosome	50s ribosomal subunit protein l15				2
PTRG_09787	glycerophosphoryl diester phosphodiesterase family protein	414	2.66		GDPD	1.4e-20	yes	yes	glycerol metabolic process	glycerophosphodiester phosphodiesterase activity	glycerophosphoryl diester phosphodiesterase family protein
						1.4e-20			lipid metabolic process
PTRG_09790	conserved hypothetical protein	423	0.24		Fasciclin	1.4e-10	yes	yes						1
					Fasciclin	5.3e-18	yes	yes						1
PTRG_09825	conserved hypothetical protein	529	1.33				yes	yes	spore germination
									mycelium development
PTRG_09863	cell surface protein (Mas1)	337	0.89		DUF3129	2.1e-66	yes	yes	response to cAMP					4	2
									entry into host					4	2
									pathogenesis					4	2
PTRG_09872	glutamyl-tRNA (Gln) amidotransferase subunit A	521	0.96		Amidase	2e-86	yes	yes		carbon-nitrogen ligase activity, with glutamine as amido-N-donor	glutamyl-trna amidotransferase subunit a
										transferase activity
PTRG_09873	hypothetical protein	435	1.38		DUF3129	3.4e-60	yes	yes	entry into host
									spore germination
									pathogenesis
PTRG_09883	conserved hypothetical protein	210	1.44		DUF11	0.029	yes	yes
					Copper-bind	0.024
PTRG_09905	bilirubin oxidase	563	0.71		Cu-oxidase_3	3.5e-20	yes	yes	developmental maturation	copper ion binding	bilirubin oxidase
					Cu-oxidase_2	3.4e-21			response to cAMP	oxidoreductase activity
					Cu-oxidase	3.9e-06			oxidation reduction
PTRG_09944	FAD binding domain containing protein	514	0.97		FAD_binding_4	2.8e-25	yes	yes		oxidoreductase activity	fad binding domain containing protein
					BBE	0.083				FAD binding
PTRG_09956	beta-N-acetylhexosaminidase	776	0.26		DCP2	0.084	yes	yes	carbohydrate metabolic process	beta-N-acetylhexosaminidase activity	glycoside hydrolase
					DDHD	0.042				cation binding
					Glyco_hydro_20	1.4e-33
PTRG_09961	predicted protein	356	3.94				yes	yes
PTRG_09963	conserved hypothetical protein	607	0.66				yes	yes
PTRG_09989	conserved hypothetical protein	322	2.18		NmrA	6.6e-08	yes	yes	metabolic process	catalytic activity
PTRG_10004	lipase 3 precursor	562	0.89		COesterase	9.9e-95	yes	yes		triglyceride lipase activity	extracellular
PTRG_10026	cell wall synthesis protein	483	3.94		SUN	9e-73	yes	yes
PTRG_10043	conserved hypothetical protein	548	1.1		p450	1.2e-10	yes	yes		electron carrier activity	cytochrome p450 family protein		2
										heme binding
										monooxygenase activity
PTRG_10055	glycosyl hydrolase	417	1.2		Glyco_hydro_76	7.7e-41	yes	yes		hydrolase activity	glycosyl hydrolase
PTRG_10075	conserved hypothetical protein	371	0.54		Abhydrolase_6	6.2e-32	yes	yes
PTRG_10078	laccase-1 precursor	568	1.23		Cu-oxidase	6.5e-33	yes	yes	oxidation reduction	oxidoreductase activity	laccase-1 precursor
					Cu-oxidase_3	2.4e-38				copper ion binding
					Cu-oxidase_2	1.1e-39
PTRG_10099	conserved hypothetical protein	356	3.1				yes	yes
PTRG_10113	conserved hypothetical protein	365	1.1				yes	yes	mycelium development
PTRG_10130	predicted protein	212	1.9				yes	yes						1
PTRG_10136	cytochrome P450	547	1.1		p450	0.0022	yes	yes	oxidation reduction	heme binding	cytochrome p450
					p450	1.7e-28				electron carrier activity
										monooxygenase activity
PTRG_10145	alpha-fucosidase	815	0.98				yes	yes
PTRG_10157	conserved hypothetical protein	400	1.75		Abhydrolase_5	3.8e-05	yes	yes
PTRG_10162	cellobiose dehydrogenase	480	1.25		GMC_oxred_C	1e-05	yes	yes	metabolic process	FAD binding	cellobiose dehydrogenase
					Pyr_redox_2	7.6e-06				oxidoreductase activity, acting on CH-OH group of donors
					GMC_oxred_N	1.5e-16
PTRG_10163	conserved hypothetical protein	294	0				yes	yes
PTRG_10176	spherulin 1a precursor	296	1.36		Cupin_1	9.7e-15	yes	yes		nutrient reservoir activity	spherulin-1b precursor
PTRG_10193	conserved hypothetical protein	301	1		Copper-bind	0.0049	yes	yes				1
PTRG_10196	endoglucanase IV precursor	252	1.59		Glyco_hydro_61	6e-78	yes	yes	cellulose catabolic process	cellulase activity	endoglucanase iv precursor	*2		1
PTRG_10200	conserved hypothetical protein	514	0.78		DUF1237	1.4e-169	yes	yes		catalytic activity	duf1237 domain-containing protein	2
PTRG_10207	endo-1,4-beta-xylanase B precursor	222	0.9		Glyco_hydro_11	1.5e-53	yes	yes	xylan catabolic process	endo-1,4-beta-xylanase activity	endo- -beta-xylanase 1	*2	4
PTRG_10216	laccase-1 precursor	529	1.33		Cu-oxidase_3	9e-42	yes	yes	oxidation reduction	copper ion binding	laccase-1 precursor
					Cu-oxidase_2	1.9e-36	yes	yes		oxidoreductase activity
PTRG_10242	endoglucanase A precursor	246	0.82		Phage_holin_5	0.052	yes	yes	polysaccharide catabolic process	cellulase activity	endoglucanase a precursor		4
					Glyco_hydro_12	3.8e-34
PTRG_10243	phosphodiesterase/alkaline phosphatase D precursor	627	0.8		PhoD	1.1e-159	yes	yes		hydrolase activity	alkaline phosphatase
PTRG_10246	conserved hypothetical protein	371	0.27		AstE_AspA	1.1e-28	yes	yes	metabolic process	hydrolase activity, acting on ester bonds	succinate dehydrogenase subunit sdh
PTRG_10265	hypothetical protein	211	1.9				yes	yes					4
PTRG_10272	choline dehydrogenase	616	1.14		GMC_oxred_C	3.3e-33	yes	yes	alcohol metabolic process	FAD binding	choline dehydrogenase
					GMC_oxred_N	1.6e-58				oxidoreductase activity, acting on CH-OH group of donors
PTRG_10273	hypothetical protein	262	1.15				yes	yes					2
PTRG_10275	amidohydrolase 3	576	1.39	yes	Amidohydro_3	8.7e-61	yes	yes	mycelium development	hydrolase activity, acting on carbon-nitrogen (but not peptide) bonds	amidohydrolase 3
PTRG_10291	protocatechuate dioxygenase	359	1.4		Dioxygenase_C	2.7e-07	yes	yes	oxidation reduction	ferric iron binding	extracellular dioxygenase
									cellular aromatic compound metabolic process	oxidoreductase activity, acting on single donors with incorporation of molecular oxygen, incorporation of two atoms of oxygen
PTRG_10302	periplasmic beta-glucosidase precursor	635	0.32		Glyco_hydro_3_C	4.6e-07	yes	yes	carbohydrate metabolic process	hydrolase activity, hydrolyzing O-glycosyl compounds	periplasmic beta-glucosidase beta-xylosidase
					Glyco_hydro_3	5.5e-35
PTRG_10304	polygalacturonase precursor	449	2.46		Glyco_hydro_28	4.6e-52	yes	yes	pectin catabolic process	galacturan 1,4-alpha-galacturonidase activity	extracellular exo-
									cellular cell wall organization	polygalacturonase activity
PTRG_10309	predicted protein	315	0.64				yes	yes
PTRG_10383	six-hairpin glycosidase	672	0.3		GDE_C	2.4e-05	yes	yes	glycogen biosynthetic process	amylo-alpha-1,6-glucosidase activity	six-hairpin glycosidase
					F5_F8_type_C	9.7e-09			cell adhesion
PTRG_10429	predicted protein	355	1.69		DUF1136	0.098	yes	no
PTRG_10445	conserved hypothetical protein	337	0.89		Glyco_hydro_cc	1.8e-68	yes	yes				4
PTRG_10453	late sexual development protein	360	0.84				yes	yes
PTRG_10464	conserved hypothetical protein	387	3.63				yes	yes
PTRG_10487	conserved hypothetical protein	247	1.63		DUF3455	3.8e-41	yes	yes							1
PTRG_10501	conserved hypothetical protein	434	0				yes	yes
PTRG_10515	glutamyl-tRNA (Gln) amidotransferase subunit A	592	0.85		Amidase	0.0069	yes	yes		amidase activity	amidase family protein
					Amidase	1.3e-69				transferase activity
										carbon-nitrogen ligase activity, with glutamine as amido-N-donor
PTRG_10545	glucan 1,3-beta-glucosidase	782	1.15		Pectate_lyase_3	7.9e-14	yes	yes
					Pectate_lyase_3	5.8e-73
PTRG_10552	arylsulfatase precursor	572	1.4		Sulfatase	1e-57	yes	yes	phenol metabolic process	arylsulfatase activity	arylsulfatase precursor
PTRG_10573	conserved hypothetical protein	493	0.61		F-box	0.0037	yes	yes						2
					Rtt106	0.0019
PTRG_10579	conserved hypothetical protein	269	1.87				yes	yes
PTRG_10583	hypothetical protein	240	1.67				yes	yes					4		6
PTRG_10585	predicted protein	345	0.58				yes	yes
PTRG_10591	hypothetical protein	239	0.84		NPP1	2.5e-58	yes	yes
PTRG_10602	mitochondrial protein cyt-4	582	1.72		RNB	5e-59	yes	yes		ribonuclease activity	mitochondrial exoribonuclease cyt-
										RNA binding
PTRG_10607	dipeptidyl-peptidase V precursor	672	0.45		Peptidase_S9	1.4e-46	yes	yes		hydrolase activity	secreted dipeptidyl peptidase
PTRG_10609	lipase B precursor	464	0.86				yes	yes
PTRG_10626	polyamine oxidase	540	0.93	yes	Amino_oxidase	6.3e-10	yes	yes	oxidation reduction	oxidoreductase activity	flavin containing polyamine
					Amino_oxidase	2e-53
PTRG_10639	extracellular elastinolytic metalloproteinase precursor	654	0.77		FTP	1.4e-09	yes	yes	proteolysis	metalloendopeptidase activity	extracellular elastinolytic metalloproteinase
					Peptidase_M36	5e-155				zinc ion binding
PTRG_10660	conserved hypothetical protein	394	1.02	yes			yes	yes
PTRG_10662	bacteriodes thetaiotaomicron symbiotic chitinase	1242	3.06		Glyco_hydro_18	2.9e-42	yes	yes	chitin catabolic process	cation binding	class v chitinase
										chitinase activity
PTRG_10678	glucan 1,3-beta-glucosidase precursor	407	0.99		Cellulase	4.6e-16	yes	yes	carbohydrate metabolic process	hydrolase activity, hydrolyzing O-glycosyl compounds	exo-beta- -glucanase		2
										cation binding
PTRG_10679	GPI anchored serine-threonine rich protein	241	1.25		GPI-anchored	1.2e-10	yes	yes		hydrolase activity	gpi anchored serine-threonine rich protein	2	5	2
PTRG_10681	pectin methylesterase	383	1.83		Pectinesterase	2.8e-25	yes	yes	cell wall modification	aspartyl esterase activity	pectin
										pectinesterase activity
PTRG_10682	cell wall glucanase (Utr2)	450	2.9		DUF3832	0.014	yes	yes	carbohydrate metabolic process	hydrolase activity, hydrolyzing O-glycosyl compounds	cell wall glucanase			4
					Glyco_hydro_16	6.1e-35			cellular cell wall organization
PTRG_10683	conserved hypothetical protein	563	1.6		Peptidase_S28	1.1e-44	yes	yes	proteolysis	serine-type peptidase activity	serine family				1
PTRG_10696	lactonohydrolase	363	0.83		SGL	5.7e-25	yes	yes		hydrolase activity	smp-30 gluconolaconase lre-like region
PTRG_10700	predicted protein	376	1.87				yes	yes
PTRG_10708	conserved hypothetical protein	464	0.86				yes	yes
PTRG_10713	pectate lyase precursor	256	3.92		Rib_5-P_isom_A	0.0073	yes	yes		pectate lyase activity	pectate lyase
					Pectate_lyase	5.1e-66
PTRG_10721	BNR/Asp-box repeatdomain containing protein	382	0.26				yes	yes		hydrolase activity	bnr asp-box repeat domain protein
PTRG_10723	Cel61b	531	0.38	yes	Glyco_hydro_61	4.4e-79	yes	yes	cellulose catabolic process	cellulase activity	glycosyl hydrolase family 61
PTRG_10743	conserved hypothetical protein	1017	0.1		Glyco_hydro_67N	0.037	yes	yes
PTRG_10752	conserved hypothetical protein	400	0.25		LicD	1.8e-31	yes	yes
PTRG_10760	conserved hypothetical protein	631	1.43	yes	Glyco_hydro_76	0.00025	yes	yes		catalytic activity	glycosyl
					Glyco_hydro_76	1.3e-15
PTRG_10761	conserved hypothetical protein	544	0.74		Peptidase_S28	7.1e-46	yes	yes	proteolysis	serine-type peptidase activity	extracelular serine carboxypeptidase		2
PTRG_10787	conserved hypothetical protein	214	1.41		Copper-bind	0.00092	yes	yes
PTRG_10806	hypothetical protein	333	1.2	yes	Endonuclease_NS	2.3e-58	yes	yes		hydrolase activity	mitochondrial nuclease
										metal ion binding
										nucleic acid binding
PTRG_10810	conserved hypothetical protein	370	2.98	yes	Tyrosinase	4.7e-36	yes	yes	metabolic process	oxidoreductase activity	conserved hypothetical protein [Pyrenophora tritici-repentis Pt-1C-BFP]
PTRG_10823	conserved hypothetical protein	237	1.69				yes	yes
PTRG_10827	endo-1,4-beta-xylanase A	232	0		Glyco_hydro_11	1.8e-78	yes	yes	xylan catabolic process	endo-1,4-beta-xylanase activity	endo- -beta-xylanase
PTRG_10868	predicted protein	413	0.49				yes	yes
PTRG_10880	60S ribosomal protein L2, mitochondrial precursor	273	0.74		RRN9	0.022	yes	yes	translation	structural constituent of ribosome	50s ribosomal protein
					Ribosomal_L27	4.9e-28
PTRG_10884	conserved hypothetical protein	246	0.41		PBP	3.6e-16	yes	yes
PTRG_10897	rhamnogalacturonase	442	2.27		Glyco_hydro_28	2.4e-32	yes	yes	carbohydrate metabolic process	polygalacturonase activity	rhamnogalacturonase b
PTRG_10908	beta-xylosidase Exo-beta (1,4)-xylanase	719	0.42		Glyco_hydro_32N	0.00034	yes	yes	xylan catabolic process	hydrolase activity, hydrolyzing O-glycosyl compounds	endo- -beta-xylanase
					Glyco_hydro_43	1.2e-56
PTRG_10918	alpha-1,2 mannosyltransferase KTR1	407	1.97		Glyco_transf_15	7.2e-133	yes	yes	protein amino acid glycosylation	glycolipid 2-alpha-mannosyltransferase activity	alpha- mannosyltransferase ktr1			1
PTRG_10923	galactose oxidase precursor	704	2.42		DUF1929	7.4e-27	yes	yes	mycelium development
					Kelch_1	3.7e-07
					PAN_1	9.5e-07
					PAN_1	4.5e-06
					Glyoxal_oxid_N	0.081
PTRG_10924	endo-beta-1,6-galactanase	481	0.42				yes	yes	carbohydrate metabolic process	cation binding	secreted endo-beta- -galactanase
										catalytic activity
PTRG_10925	invertase precursor	582	0.34		Glyco_hydro_32N	4.2e-78	yes	yes	carbohydrate metabolic process	hydrolase activity, hydrolyzing O-glycosyl compounds	invertase precursor	*2			2
					Glyco_hydro_32C	1.7e-05
PTRG_10927	conserved hypothetical protein	409	0.49				yes	yes
PTRG_10937	conserved hypothetical protein	817	1.1		Glyco_hydro_92	1e-170	yes	yes		hydrolase activity	alpha- - subfamily
PTRG_10953	peptidase S41 family protein	782	0.51		Peptidase_S41	3.4e-10	yes	yes	proteolysis	serine-type peptidase activity	peptidase s41 family protein
PTRG_10976	conserved hypothetical protein	313	0				yes	yes					2		2
PTRG_10983	1,3-beta-glucanosyltransferase gel1 precursor	453	0.88		Glyco_hydro_72	1.2e-119	yes	yes	carbohydrate metabolic process	transferase activity
PTRG_10984	conserved hypothetical protein	288	0.7				yes	yes						3	2
PTRG_10995	conserved hypothetical protein	340	1.77		Lipase_GDSL	2.9e-08	yes	yes	lipid metabolic process	hydrolase activity, acting on ester bonds	lysophospholipase a
PTRG_11006	conserved hypothetical protein	369	3.8	yes			yes	yes
PTRG_11016	conserved hypothetical protein	237	1.69				yes	yes
PTRG_11019	ABC-type amino acid transporter	289	1.39		SBP_bac_3	6.2e-33	yes	yes	response to stimulus	catalytic activity	cyclohexadienyl dehydratase precursor
									transport	transporter activity
									cellular amino acid metabolic process
PTRG_11023	3-phytase precursor	616	3.09		Phytase	1.1e-63	yes	yes		3-phytase activity	3-phytase
					EGF_2	0.027
					EGF_2	5.2e-06
PTRG_11032	conserved hypothetical protein	457	2.63		Glyco_hydro_61	0.098	yes	yes						2
					Chitin_bind_3	0.00036								2
PTRG_11039	conserved hypothetical protein	829	0.72	yes	DUF3405	1.6e-153	yes	yes
PTRG_11052	feruloyl esterase B precursor	542	2.03		Tannase	7.3e-106	yes	yes		hydrolase activity	feruloyl esterase b precursor
PTRG_11054	choline dehydrogenase	549	0.55		GMC_oxred_C	2e-09	yes	yes	alcohol metabolic process	oxidoreductase activity, acting on CH-OH group of donors	glucose oxidase
					GMC_oxred_N	6.3e-57				FAD binding
PTRG_11055	hypothetical protein	379	2.12		DUF3129	3.7e-54	yes	yes	mycelium development
PTRG_11064	conserved hypothetical protein	265	0.76				yes	yes
PTRG_11066	hypothetical protein	245	0.82				yes	yes					2
PTRG_11067	predicted protein	216	2.33				yes	yes
PTRG_11086	predicted protein	405	1.98				yes	yes
PTRG_11094	aspergillopepsin A precursor	428	0.7		Asp	1.2e-31	yes	yes	proteolysis	aspartic-type endopeptidase activity	aspergillopepsin a precursor		2
PTRG_11109	conserved hypothetical protein	289	0				yes	yes						2	2
PTRG_11110	conserved hypothetical protein	310	0.32				yes	yes
PTRG_11123	trypsin precursor	265	2.27		Trypsin	2.3e-65	yes	yes	proteolysis	serine-type endopeptidase activity	a chain fusarium oxysporum trypsin at atomic resolution
PTRG_11132	cutinase precursor	252	1.59		Cutinase	6.2e-47	yes	yes	pathogenesis	cutinase activity	cutinase precursor
									metabolic process
PTRG_11133	trehalase precursor	672	1.04		Trehalase	5.2e-113	yes	yes	trehalose metabolic process	alpha,alpha-trehalase activity	trehalase precursor
PTRG_11169	FAD binding domain containing protein	620	1.13		BBE	2.5e-05	yes	yes		oxidoreductase activity	fad binding domain containing protein
					FAD_binding_4	8.4e-17				FAD binding
PTRG_11188	conserved hypothetical protein	385	3.13				yes	yes					2	2
PTRG_11212	pectinesterase precursor	376	1.07		Pectinesterase	6.3e-49	yes	yes	cell wall modification	pectinesterase activity	pectinesterase precursor
									interaction with host via protein secreted by type II secretion system	aspartyl esterase activity
PTRG_11213	pectate lyase	330	0.61		Pec_lyase_C	0.0053	yes	yes		lyase activity	pectate lyase
PTRG_11214	cutinase precursor	238	1.69		Cutinase	6.3e-55	yes	yes	metabolic process	cutinase activity	cutinase precursor
PTRG_11214	cutinase precursor	238	1.69		Cutinase	6.3e-55	yes	yes	pathogenesis	cutinase activity	cutinase precursor
PTRG_11218	polygalacturonase precursor	391	2.56		Glyco_hydro_28	3.1e-86	yes	yes	carbohydrate metabolic process	hydrolase activity, acting on ester bonds	endopolygalacturonase 3
									cellular cell wall organization	polygalacturonase activity
PTRG_11219	predicted protein	232	0				yes	yes
PTRG_11224	beta-glucosidase 2 precursor	818	0.86		Glyco_hydro_3_C	7.6e-50	yes	yes	carbohydrate metabolic process	beta-glucosidase activity	beta-glucosidase g	*2
					Glyco_hydro_3	1.3e-74
PTRG_11231	predicted protein	300	3.34	yes			yes	yes
PTRG_11263	conserved hypothetical protein	269	0		GPI-anchored	1.4e-14	yes	yes	cell wall biogenesis			*2
					KRE9	1.7e-15						2
PTRG_11275	leucine aminopeptidase 2	390	0.77		Rep_3	0.0079	yes	yes	proteolysis	aminopeptidase activity	leucine aminopeptidase 2
					Peptidase_M28	3.5e-27
PTRG_11301	GDSL lipase/acylhydrolase family protein	357	1.4		Lipase_GDSL	2.2e-17	yes	yes	lipid metabolic process	hydrolase activity, acting on ester bonds	gdsl lipase acylhydrolase family protein
PTRG_11304	predicted protein	219	1.38				yes	yes
PTRG_11367	FAD binding domain containing protein	533	0.94		BBE	0.048	yes	yes		FAD binding	fad binding domain containing protein
					DHHA1	0.048	yes	yes		oxidoreductase activity
					FAD_binding_4	3.5e-21	yes	yes
PTRG_11404	FAD binding domain containing protein	508	0.79	yes	FAD_binding_4	1.1e-18	yes	yes		FAD binding	fad binding domain-containing protein
										oxidoreductase activity
PTRG_11415	chitin binding protein	545	4.41		Chitin_bind_1	8.7e-05	yes	yes	cell wall macromolecule catabolic process	hydrolase activity, acting on carbon-nitrogen (but not peptide) bonds	chitin binding protein
					Chitin_bind_1	1.2e-05			chitin catabolic process	chitinase activity
					Polysacc_deac_1	5.7e-28				chitin binding
										hydrolase activity, acting on carbon-nitrogen (but not peptide) bonds
PTRG_11432	predicted protein	235	3.42				yes	yes
PTRG_11442	extracellular cell wall glucanase Crf1/allergen Asp F9	438	0.69		Glyco_hydro_16	4.3e-42	yes	yes	cellular cell wall organization	hydrolase activity, hydrolyzing O-glycosyl compounds	cell wall				2
									carbohydrate metabolic process
PTRG_11447	hypothetical protein	216	8.84				yes	yes					2
PTRG_11454	lactonase	400	0.25		SGL	5.8e-22	yes	yes		hydrolase activity	evolved d-pantonohydrolase		2		2
PTRG_11472	conserved hypothetical protein	688	0.58		DUF946	3.1e-10	yes	yes
PTRG_11480	cytochrome P450 52A11	506	0.59		p450	5.2e-62	yes	yes	oxidation reduction	oxidoreductase activity, acting on paired donors, with incorporation or reduction of molecular oxygen, reduced flavin or flavoprotein as one donor, and incorporation of one atom of oxygen	cytochrome p450 52a11		6
										heme binding
										electron carrier activity
PTRG_11481	beta-hexosaminidase beta chain precursor	536	0.75		Glyco_hydro_20b	5e-10	yes	yes	carbohydrate metabolic process	cation binding	beta-hexosaminidase beta chain precursor
					Glyco_hydro_20	4.7e-91			mycelium development	beta-N-acetylhexosaminidase activity
PTRG_11495	conserved hypothetical protein	298	1.01				yes	yes	oxidation reduction	transition metal ion binding
										oxidoreductase activity
PTRG_11512	conserved hypothetical protein	771	0.91		Peptidase_S41	6e-11	yes	yes	proteolysis	serine-type peptidase activity	peptidase s41 family protein
PTRG_11560	alpha-arabinofuranosidase II	369	1.36		Glyco_hydro_43	5.7e-41	yes	yes	carbohydrate metabolic process	hydrolase activity, hydrolyzing O-glycosyl compounds	alpha-n-arabinofuranosidase
PTRG_11564	vacuolar protease A precursor	400	1		Asp	5.1e-109	yes	yes	pathogenesis	aspartic-type endopeptidase activity	aspartic endopeptidase pep2		4	4	3
PTRG_11564	vacuolar protease A precursor	400	1		Asp	5.1e-109	yes	yes	proteolysis	aspartic-type endopeptidase activity	aspartic endopeptidase pep2		4	4	3
PTRG_11595	predicted protein	283	4.61				yes	yes
PTRG_11605	hypothetical protein	226	0.44				yes	yes				2	6	14	7
PTRG_11634	conserved hypothetical protein	204	2.46				yes	yes				2	2	6	2
PTRG_11652	FAD binding domain containing protein	420	1.67	yes	FAD_binding_3	2.6e-19	yes	yes	oxidation reduction	monooxygenase activity	zeaxanthin epoxidase
PTRG_11669	chaperone protein dnaJ	421	2.14	yes	DnaJ_C	4.9e-11	yes	yes	protein folding	unfolded protein binding	domain-containing protein				2
					DnaJ_CXXCXGXG	4.9e-16				heat shock protein binding
					DnaJ	4e-26				metal ion binding
PTRG_11693	predicted protein	252	1.99	yes			yes	yes							2
PTRG_11699	conserved hypothetical protein	473	1.06		Glyco_hydro_cc	8e-55	yes	yes					4	4	4
PTRG_11718	conserved hypothetical protein	274	2.2				yes	yes					6	2	8
PTRG_11814	retinol dehydrogenase 13	326	0		adh_short	3.9e-13	yes	yes	oxidation reduction	oxidoreductase activity	retinol dehydrogenase 13		2		2
										binding
PTRG_11817	cytochrome P450	443	0.45		p450	1.6e-23	yes	no		heme binding	cytochrome p450
										monooxygenase activity
										electron carrier activity
PTRG_11837	cytochrome P450	443	0.45		p450	7.3e-24	yes	no		monooxygenase activity	cytochrome p450
										electron carrier activity
										heme binding
PTRG_11850	beta-Ig-H3/Fasciclin	389	0		Fasciclin	4.4e-21	yes	yes
					Fasciclin	6.1e-28	yes	yes
PTRG_11858	predicted protein	577	0				yes	yes
PTRG_11865	predicted protein	570	1.23				yes	yes
PTRG_11911	endo alpha-1,4 polygalactosaminidase precusor	330	2.13		DUF297	5.3e-44	yes	yes
PTRG_11924	cytochrome P450 3A17	503	0.8	yes	p450	6.4e-80	yes	yes	oxidation reduction	electron carrier activity	cytochrome p450 3a17
										monooxygenase activity
										heme binding
PTRG_11962	conserved hypothetical protein	292	1.72				no	yes
PTRG_11996	predicted protein	732	0.82				yes	yes
PTRG_11997	hypothetical protein	322	1.25		DUF3382	0.056	yes	yes	propionate catabolic process	2-methylcitrate dehydratase activity	family protein
					MmgE_PrpD	0.0059
					MmgE_PrpD	3.1e-40
PTRG_12011	isoamyl alcohol oxidase	598	2.01		BBE	2.6e-08	yes	yes	oxidation reduction	oxidoreductase activity	isoamyl alcohol oxidase		2
					FAD_binding_4	1.8e-13	yes	yes		FAD binding
PTRG_12039	cytochrome P450 3A17	477	0.63	yes	p450	1.1e-70	no	yes	oxidation reduction	electron carrier activity	cytochrome p450 3a17
										monooxygenase activity
										heme binding
PTRG_12056	pisatin demethylase	497	1.21	yes	p450	7.5e-71	yes	yes	oxidation reduction	electron carrier activity	pisatin demethylase				4
										methyltransferase activity
										monooxygenase activity
										heme binding
PTRG_12146	pisatin demethylase	521	1.15	yes	p450	6.6e-56	no	yes	oxidation reduction	heme binding	pisatin demethylase	2
										monooxygenase activity
										electron carrier activity
										methyltransferase activity
a Transmembrane prediction performed in TMHMM
b A PFAM database search was performed to detect matches with Hidden Markov Models (HMM). E-values from the search have been included.
c Presence/absence of a locus in the resequenced isolates was determined by RPKM values for each locus and the absence confirmed with a Blastn search of the de novo assembled genomes of the resequenced isolates.
d GO annotation was performed in Blast2GO.
e A GO enrichment analysis (ESTs in planta vs. entire genome) was performed in Blast2GO and an asterisk indicates those genes that are in GO categories that are over-represented.
