# Supplementary material for: Comparative Genomics of a Plant-Pathogenic Fungus, Pyrenophora tritici-repentis, Reveals Transduplication and the Impact of Repeat Elements on Pathogenicity and Population Divergence
Source: G3 (Bethesda). 2013 Jan 1;3(1):41–63. doi: 10.1534/g3.112.004044 (PMC3538342; doi:10.1534/g3.112.004044)
Supplement: Supporting Information [file supp_3.1.41_TableS16.xlsx]

## Sheet: TableS16
Table S16 Putative polyketide synthetase gene of P. tritici-repentis
P. tritici-repentis locus		Best Hita				Similar to Cochliobolus	EST support	PTRG loci in putative cluster	Present
	Organism	Accession		(%iden/sim)b	Reciprocal?				DW7-ToxB	SD20-NP	Notes
Non-reducing
Clade I/II
PTRG_02708	C. heterostrophus	AAR90273.1		(74/86)	yes	PKS19	yes	02706-02730	yes (0)	yes (6)	emodin-like biosynthetic cluster similar to A. nidulans
PTRG_03323	B. oryzae	BAD22832.1		(87/92)	yes	PKS18	yes		yes (0)	yes (6))	melanin biosynthesis
PTRG_04385	H. subiculosus	ACD39753.1		(51/67)				04382-04389*	yes (1)	yes (14)
PTRG_09655	P. anserina	XP_001903585.1		(36/49)	yes			09648-09655*	yes (0)	yes (14)	resorcyclic acid lactone-like cluster i.e. zealerone
Clade III											cluster shared with P. anserina
PTRG_07420	C. heterostrophus	AAR90276.1		(82/89)1	yes	PKS22		07418-07425	yes (0)	yes (6)
PTRG_11422	C. heterostrophus	AAR90275.1		(20/25)		PKS21 (PTR is truncated 5', missing ~1450aa and has additional 3' seq (60/76 without 5' and 3')			yes (3)	yes (20)
Reducing
Clade I
PTRG_00044	C. heterostrophus	AAR90260.1		(43/47)		PKS5 (PTR is missing about 950 aa in the 5'. Comparison when 5' left off (65/72)			yes (0)	yes (8)
PTRG_00110	A. solani	BAE80697.1		(64/72)	yes	PKS9 (65/77)	yes	00110-00119	yes (0)	yes (15)
PTRG_03683	A. niger	XP_001396949.1		(41/60)	yes				yes (0)	yes (16)
PTRG_04144	A. solani	BAD83684.1		(87/94)	yes	PKS6 (78/88)	yes	04144-04148	yes (0)	yes (12)	alternapyrone-like cluster
PTRG_04387	G. zeae	ABB90283.1		(59/75)	yes			04382-04389*	yes (0)	yes (16)	resorcyclic acid lactone-like cluster i.e. zealerone
PTRG_06299	G. zeae	XP_385970.1		(64/78)	yes				yes (1)	yes (6)	similar to G. zeae PKS5; cluster of four genes surrounded by transposon remnants.
PTRG_06803	A. clavatus	XP_001270321.1		(39/56)	yes		yes		yes (2)	yes (11)
PTRG_09108	A. flavus	XP_002382732.1			yes				yes (1)	yes (16)
PTRG_11829	T. stipitatus	XP_002486489.1		(31/46)			yes		yes (1)	no
PTRG_12149	P. chrysogenum	XP_002567442.1		(48/65)	yes		yes	12142-12149	no	yes (30)	cluster flanked by transposons
Clade II
PTRG_03951	S. nodorum	XP_001798193.1		(76/83)	yes	PKS16 (59/65)	yes	03946-03951	yes (0)	yes (10)
PTRG_12024	M. pilosus	ABA02239.1		(42/55)	no			12024-12035	no	no	Some cluster members 98-99% similar to S. nodorum proteins SNOG_07867, 07868, 07871 & 07872
Clade IV
PTRG_11830	P. anserina	XP_001904308.1		(35/51)	no		yes			no
PTRG_11838	P. tritici-repentis 11830			1	***				no	no
PTRG_11926	A. fumigatus	XP_001275051		(16/19)		PKS12?		11926-11930	yes (0)	yes (7)	PKS truncated; cluster of five genes surrounded by transposons
a Best hit BlastP NCBI
b Comparison by Needle (Rice et al. 2002, Needleman and Wunsch, 1970)
* Other members in cluster have EST support
